# Supplementary material
Source: publisher figshare collection journal article supplement (https://acs.figshare.com/ndownloader/files/4708933)
Supplement: Supplementary file 1 [file 4708933]

data_C12A7-ST_RT_publ

_pd_block_id
  2006-06-05T13:03|C12A7-ST_RT|Luis|Overall

_audit_creation_method  "from EXP file using GSAS2CIF"
_audit_creation_date                   2006-06-05T13:03
_audit_author_name                     Luis
_audit_update_record
; 2006-06-05T13:03  Initial CIF as created by GSAS2CIF
;

#=============================================================================
# this information describes the project, paper etc. for the CIF             #
# Acta Cryst. Section C papers and editorial correspondence is generated     #
# from the information in this section                                       #
#                                                                            #
#   (from)   CIF submission form for Rietveld refinements (Acta Cryst. C)    #
#                                                 Version 14 December 1998   #
#=============================================================================
# 1. SUBMISSION DETAILS

_publ_contact_author_name            ?   # Name of author for correspondence
_publ_contact_author_address             # Address of author for correspondence
; ?
;
_publ_contact_author_email           ?
_publ_contact_author_fax             ?
_publ_contact_author_phone           ?

_publ_contact_letter
; ?
;

_publ_requested_journal              ?
_publ_requested_coeditor_name        ?
_publ_requested_category             ?   # Acta C: one of CI/CM/CO/FI/FM/FO

#==============================================================================

# 2. PROCESSING SUMMARY (IUCr Office Use Only)

_journal_data_validation_number      ?

_journal_date_recd_electronic        ?
_journal_date_to_coeditor            ?
_journal_date_from_coeditor          ?
_journal_date_accepted               ?
_journal_date_printers_first         ?
_journal_date_printers_final         ?
_journal_date_proofs_out             ?
_journal_date_proofs_in              ?
_journal_coeditor_name               ?
_journal_coeditor_code               ?
_journal_coeditor_notes
; ?
;
_journal_techeditor_code             ?
_journal_techeditor_notes
; ?
;
_journal_coden_ASTM                  ?
_journal_name_full                   ?
_journal_year                        ?
_journal_volume                      ?
_journal_issue                       ?
_journal_page_first                  ?
_journal_page_last                   ?
_journal_paper_category              ?
_journal_suppl_publ_number           ?
_journal_suppl_publ_pages            ?

#==============================================================================

# 3. TITLE AND AUTHOR LIST

_publ_section_title
; ?
;
_publ_section_title_footnote
; ?
;

# The loop structure below should contain the names and addresses of all
# authors, in the required order of publication. Repeat as necessary.

loop_
	_publ_author_name
        _publ_author_footnote
	_publ_author_address
 ?                                   #<--'Last name, first name'
; ?
;
; ?
;

#==============================================================================

# 4. TEXT

_publ_section_synopsis
;  ?
;
_publ_section_abstract
; ?
;
_publ_section_comment
; ?
;
_publ_section_exptl_prep      # Details of the preparation of the sample(s)
                              # should be given here.
; ?
;
_publ_section_exptl_refinement
; ?
;
_publ_section_references
; ?
;
_publ_section_figure_captions
; ?
;
_publ_section_acknowledgements
; ?
;

#=============================================================================
# 5. OVERALL REFINEMENT & COMPUTING DETAILS

_refine_special_details
; ?
;
_pd_proc_ls_special_details
; ?
;

# The following items are used to identify the programs used.
_computing_molecular_graphics     ?
_computing_publication_material   ?

_refine_ls_weighting_scheme       ?
_refine_ls_weighting_details      ?
_refine_ls_hydrogen_treatment     ?
_refine_ls_extinction_method      ?
_refine_ls_extinction_coef        ?
_refine_ls_number_constraints     ?

_refine_ls_restrained_S_all       ?
_refine_ls_restrained_S_obs       ?

#==============================================================================
# 6. SAMPLE PREPARATION DATA

# (In the unusual case where multiple samples are used in a single
#  Rietveld study, this information should be moved into the phase
#  blocks)

# The following three fields describe the preparation of the material.
# The cooling rate is in K/min.  The pressure at which the sample was
# prepared is in kPa.  The temperature of preparation is in K.

_pd_prep_cool_rate                ?
_pd_prep_pressure                 ?
_pd_prep_temperature              ?

_pd_char_colour                   ?       # use ICDD colour descriptions
data_C12A7-ST_RT_overall

_refine_ls_shift/su_max                0.12
_refine_ls_shift/su_mean               0.00
_computing_structure_refinement        GSAS
_refine_ls_number_parameters           93
_refine_ls_goodness_of_fit_all         0.58
_refine_ls_number_restraints           0

# Overall powder R-factors

_pd_proc_ls_prof_R_factor              0.0489
_pd_proc_ls_prof_wR_factor             0.0356
_refine_ls_matrix_type                 full

# pointers to the phase blocks
loop_   _pd_phase_block_id
      2006-06-05T13:03|C12A7-ST_RT_phase1|Luis||
      2006-06-05T13:03|C12A7-ST_RT_phase2|Luis||
# pointers to the diffraction patterns
loop_   _pd_block_diffractogram_id
      2006-06-05T13:03|C12A7-ST_RT_H_01|Luis|HRPT
      2006-06-05T13:03|C12A7-ST_RT_H_02|Luis|ID31

# Information for phase 1
data_C12A7-ST_RT_phase_1

_pd_block_id
  2006-06-05T13:03|C12A7-ST_RT_phase1|Luis||

# Histograms for phase 1
loop_   _pd_block_diffractogram_id
  2006-06-05T13:03|C12A7-ST_RT_H_01|Luis|HRPT
  2006-06-05T13:03|C12A7-ST_RT_H_02|Luis|ID31

#==============================================================================
# 7. CHEMICAL, STRUCTURAL AND CRYSTAL DATA

_pd_char_particle_morphology      ?

_chemical_name_systematic
; ?
;
_chemical_name_common             ?
_chemical_formula_moiety          ?
_chemical_formula_structural      ?
_chemical_formula_analytical      ?
_chemical_melting_point           ?
_chemical_compound_source         ?       # for minerals and
                                          # natural products
_symmetry_space_group_name_Hall   ?

_exptl_crystal_F_000               ?
_exptl_crystal_density_diffrn      ?
_exptl_crystal_density_meas        ?
_exptl_crystal_density_method      ?

_cell_measurement_temperature     ?

_cell_special_details
; ?
;

_geom_special_details             ?

# The following item identifies the program(s) used (if appropriate).
_computing_structure_solution     ?

#==============================================================================

# 8. Phase information from GSAS

_pd_phase_name                         C12A7-st
_cell_length_a                         11.986813(5)
_cell_length_b                         11.986813
_cell_length_c                         11.986813
_cell_angle_alpha                      90.0
_cell_angle_beta                       90.0
_cell_angle_gamma                      90.0
_cell_volume                           1722.3090(8)
_symmetry_cell_setting                 cubic
_symmetry_space_group_name_H-M         "I -4 3 d"
loop_ _symmetry_equiv_pos_site_id _symmetry_equiv_pos_as_xyz
       1 +x,+y,+z 
       2 +z,+x,+y 
       3 +y,+z,+x 
       4 +y+3/4,-x+1/4,-z+3/4 
       5 -z+3/4,+y+3/4,-x+1/4 
       6 -x+1/4,-z+3/4,+y+3/4 
       7 -x,-y+1/2,+z 
       8 -z+1/2,+x,-y 
       9 -y,-z+1/2,+x 
      10 +x,-y,-z+1/2 
      11 +z,-x,-y+1/2 
      12 -y+1/2,+z,-x 
      13 -y+1/4,+x+1/4,-z+3/4 
      14 -z+3/4,-y+1/4,+x+1/4 
      15 +x+1/4,-z+3/4,-y+1/4 
      16 +x+3/4,+z+3/4,+y+3/4 
      17 +y+3/4,+x+3/4,+z+3/4 
      18 +z+3/4,+y+3/4,+x+3/4 
      19 +y+1/2,-z+1/2,-x 
      20 -y+3/4,-x+1/4,+z+1/4 
      21 +z+1/4,-y+3/4,-x+1/4 
      22 -x+1/4,+z+1/4,-y+3/4 
      23 -x,+y+1/2,-z+1/2 
      24 -z+1/2,-x,+y+1/2 
     101 +x+1/2,+y+1/2,+z+1/2 
     102 +z+1/2,+x+1/2,+y+1/2 
     103 +y+1/2,+z+1/2,+x+1/2 
     104 +y+1/4,-x+3/4,-z+1/4 
     105 -z+1/4,+y+1/4,-x+3/4 
     106 -x+3/4,-z+1/4,+y+1/4 
     107 -x+1/2,-y,+z+1/2 
     108 -z,+x+1/2,-y+1/2 
     109 -y+1/2,-z,+x+1/2 
     110 +x+1/2,-y+1/2,-z 
     111 +z+1/2,-x+1/2,-y 
     112 -y,+z+1/2,-x+1/2 
     113 -y+3/4,+x+3/4,-z+1/4 
     114 -z+1/4,-y+3/4,+x+3/4 
     115 +x+3/4,-z+1/4,-y+3/4 
     116 +x+1/4,+z+1/4,+y+1/4 
     117 +y+1/4,+x+1/4,+z+1/4 
     118 +z+1/4,+y+1/4,+x+1/4 
     119 +y,-z,-x+1/2 
     120 -y+1/4,-x+3/4,+z+3/4 
     121 +z+3/4,-y+1/4,-x+3/4 
     122 -x+3/4,+z+3/4,-y+1/4 
     123 -x+1/2,+y,-z 
     124 -z,-x+1/2,+y 

# ATOMIC COORDINATES AND DISPLACEMENT PARAMETERS


loop_
      _atom_site_type_symbol
      _atom_site_label
      _atom_site_fract_x
      _atom_site_fract_y
      _atom_site_fract_z
      _atom_site_occupancy
      _atom_site_thermal_displace_type
      _atom_site_U_iso_or_equiv
      _atom_site_symmetry_multiplicity
Ca Ca1 0.89077(7)   0.0        0.75         0.8572(25) Uani   0.00804      24
Al Al1 1.01843(3)   0.01843(3) 1.01843(3)   1.0        Uani   0.00925      16
Al Al2 1.0         -0.25       0.625        1.0        Uani   0.00505      12
O  O2  0.93556(3)  -0.06443(3) 0.93556(3)   1.0        Uani   0.01105      16
O  O1  0.90020(3)  -0.19228(3) 0.71324(3)   1.0        Uani   0.01239      48
Ca Ca2 0.9403(5)    0.0        0.75         0.1428(25) Uiso   0.0164(8)    24
O  O3  0.7228(7)    0.120(2)  -0.0016(28)   0.0434(4)  Uiso   0.03         48

loop_ 
 _atom_site_aniso_label
 _atom_site_aniso_U_11
 _atom_site_aniso_U_12
 _atom_site_aniso_U_13
 _atom_site_aniso_U_22
 _atom_site_aniso_U_23
 _atom_site_aniso_U_33
Ca1 0.01352(34)  0.0          0.0          0.00467(18)  0.00146(15) 0.00593(18)
Al1 0.00925(13) -0.00092(13) -0.00092(13)  0.00925(13) -0.00092(13) 0.00925(13)
Al2 0.00691(19)  0.0          0.0          0.00691(19)  0.0         0.00134(29)
O2  0.01105(9)  -0.00271(10) -0.00271(10)  0.01105(9)  -0.00271(10) 0.01105(9)
O1  0.01321(16) -0.00104(10)  0.00805(11)  0.01046(15) -0.00370(10) 0.01349(17)

loop_ 
 _atom_type_symbol
 _atom_type_number_in_cell
                   Ca 24.0        
                   Al 28.0        
                   O  66.084      
 
# If you change Z, be sure to change all 3 of the following
_chemical_formula_sum                  "Al7 Ca6.00 O16.52"
_chemical_formula_weight               693.67
_cell_formula_units_Z                  4

# MOLECULAR GEOMETRY

loop_
      _geom_bond_atom_site_label_1
      _geom_bond_atom_site_label_2
      _geom_bond_distance
      _geom_bond_site_symmetry_1
      _geom_bond_site_symmetry_2
      _geom_bond_publ_flag
  Ca1       Ca1             3.67992(8)  .      2_546  N
  Ca1       Ca1             3.67992(8)  .      3_645  N
  Ca1       Ca1              5.5108(4)  .      4_566  N
  Ca1       Ca1              5.7127(5)  .      5_646  N
  Ca1       Ca1             5.6153(16)  .      6_755  N
  Ca1       Ca1             3.67992(8)  .     11_565  N
  Ca1       Ca1              5.5108(4)  .     13_646  N
  Ca1       Ca1              5.7127(5)  .     14_655  N
  Ca1       Ca1              5.5108(4)  .     17_534  N
  Ca1       Ca1              5.7127(5)  .     18_444  N
  Ca1       Ca1              5.5108(4)  .    104_656  N
  Ca1       Ca1              5.7127(5)  .    105_656  N
  Ca1       Ca1             3.67992(8)  .    112_646  N
  Ca1       Al1              3.5699(6)  .      1_555  N
  Ca1       Al1              3.1470(6)  .      4_566  N
  Ca1       Al1              3.5699(6)  .     10_556  N
  Ca1       Al1              3.1471(6)  .     16_435  N
  Ca1       Al2            3.59716(29)  .      1_555  N
  Ca1       Al2              3.1858(8)  .      2_546  N
  Ca1       Al2            3.59716(29)  .     10_556  N
  Ca1       O2             2.41504(31)  .      1_555  N
  Ca1       O2             2.41504(31)  .     10_556  N
  Ca1       O1             2.34932(30)  .      1_555  N
  Ca1       O1               2.5374(8)  .      2_546  N
  Ca1       O1             4.00593(35)  .      3_645  N
  Ca1       O1             2.34932(30)  .     10_556  N
  Ca1       O1               2.5374(8)  .     11_565  N
  Ca1       O1               3.7121(5)  .    104_656  N
  Ca1       O1               3.7121(5)  .    117_645  N
  Ca1       O1             4.00593(35)  .    119_666  N
  Ca1       Ca2               0.593(5)  .      1_555  N
  Ca1       Ca2              3.5129(9)  .      2_546  N
  Ca1       Ca2             3.9870(29)  .      3_645  N
  Ca1       Ca2               5.061(4)  .      4_566  N
  Ca1       Ca2               5.022(6)  .      6_755  N
  Ca1       Ca2              3.5129(9)  .     11_565  N
  Ca1       Ca2             5.7204(18)  .     13_646  N
  Ca1       Ca2               5.061(4)  .     17_534  N
  Ca1       Ca2              5.6066(4)  .     18_444  N
  Ca1       Ca2             5.7204(18)  .    104_656  N
  Ca1       Ca2              5.6066(4)  .    105_656  N
  Ca1       Ca2             3.9870(29)  .    112_646  N
  Ca1       O3               3.873(29)  .      1_556  N
  Ca1       O3               2.770(18)  .      3_655  N
  Ca1       O3               3.512(17)  .      5_546  N
  Ca1       O3               3.873(29)  .     10_555  N
  Ca1       O3               2.883(18)  .     13_645  N
  Ca1       O3               3.512(17)  .     14_555  N
  Ca1       O3               4.046(15)  .     18_544  N
  Ca1       O3               3.609(29)  .    107_655  N
  Ca1       O3               2.770(18)  .    119_656  N
  Ca1       O3               2.883(18)  .    120_655  N
  Ca1       O3               4.046(15)  .    121_556  N
  Ca1       O3               3.609(29)  .    123_656  N
  Al1       Ca1              3.5699(6)  .      1_555  N
  Al1       Ca1              3.5699(6)  .      2_546  N
  Al1       Ca1              3.5699(6)  .      3_645  N
  Al1       Ca1              3.1470(6)  .     13_646  N
  Al1       Ca1              3.1470(6)  .     14_655  N
  Al1       Ca1              3.1471(6)  .     15_556  N
  Al1       O2               1.7205(8)  .      1_555  N
  Al1       O1               1.7759(4)  .    116_546  N
  Al1       O1               1.7759(4)  .    117_645  N
  Al1       O1               1.7759(4)  .    118_555  N
  Al1       Ca2             3.3586(16)  .      1_555  N
  Al1       Ca2             3.3586(16)  .      2_546  N
  Al1       Ca2             3.3586(16)  .      3_645  N
  Al1       Ca2             3.4635(33)  .     13_646  N
  Al1       Ca2             3.4635(33)  .     14_655  N
  Al1       Ca2             3.4636(33)  .     15_556  N
  Al2       Ca1            3.59716(29)  .      1_555  N
  Al2       Ca1              3.1858(8)  .      3_645  N
  Al2       Ca1              3.1858(8)  .      5_646  N
  Al2       Ca1            3.59716(29)  .      7_745  N
  Al2       Ca1            3.59716(29)  .     17_534  N
  Al2       Ca1            3.59716(29)  .    104_656  N
  Al2       O1             1.74032(30)  .      1_555  N
  Al2       O1             1.74032(30)  .      7_745  N
  Al2       O1             1.74032(30)  .    104_656  N
  Al2       O1             1.74032(30)  .    113_536  N
  Al2       Ca2             3.4261(12)  .      1_555  N
  Al2       Ca2               3.779(5)  .      3_645  N
  Al2       Ca2               3.779(5)  .      5_646  N
  Al2       Ca2             3.4261(12)  .      7_745  N
  Al2       Ca2             3.4261(12)  .     17_534  N
  Al2       Ca2             3.4261(12)  .    104_656  N
  O2        Ca1            2.41504(31)  .      1_555  N
  O2        Ca1            2.41506(31)  .      2_546  N
  O2        Ca1            2.41508(31)  .      3_645  N
  O2        Al1              1.7205(8)  .      1_555  N
  O2        Ca2            2.35527(22)  .      1_555  N
  O2        Ca2            2.35528(22)  .      2_546  N
  O2        Ca2            2.35532(22)  .      3_645  N
  O1        Ca1            2.34932(30)  .      1_555  N
  O1        Ca1            4.00593(35)  .      2_546  N
  O1        Ca1              2.5374(8)  .      3_645  N
  O1        Ca1              3.7121(5)  .     17_534  N
  O1        Al1              1.7759(4)  .     16_435  N
  O1        Al2            1.74032(30)  .      1_555  N
  O1        Ca2             2.3953(12)  .      1_555  N
  O1        Ca2               3.052(5)  .      3_645  N
  O1        Ca2             3.4288(23)  .     17_534  N
  Ca2       Ca1               0.593(5)  .      1_555  N
  Ca2       Ca1             3.9870(29)  .      2_546  N
  Ca2       Ca1              3.5129(9)  .      3_645  N
  Ca2       Ca1             5.7204(18)  .      4_566  N
  Ca2       Ca1              5.6066(4)  .      5_646  N
  Ca2       Ca1               5.022(6)  .      6_755  N
  Ca2       Ca1             3.9870(29)  .     11_565  N
  Ca2       Ca1               5.061(4)  .     13_646  N
  Ca2       Ca1              5.6066(4)  .     14_655  N
  Ca2       Ca1             5.7204(18)  .     17_534  N
  Ca2       Ca1               5.061(4)  .    104_656  N
  Ca2       Ca1              3.5129(9)  .    112_646  N
  Ca2       Al1             3.3586(16)  .      1_555  N
  Ca2       Al1             3.4635(33)  .      4_566  N
  Ca2       Al1             3.3586(16)  .     10_556  N
  Ca2       Al1             3.4636(33)  .     16_435  N
  Ca2       Al2             3.4261(12)  .      1_555  N
  Ca2       Al2               3.779(5)  .      2_546  N
  Ca2       Al2             3.4261(12)  .     10_556  N
  Ca2       O2             2.35527(22)  .      1_555  N
  Ca2       O2             2.35527(22)  .     10_556  N
  Ca2       O1              2.3953(12)  .      1_555  N
  Ca2       O1                3.052(5)  .      2_546  N
  Ca2       O1              2.3953(12)  .     10_556  N
  Ca2       O1                3.052(5)  .     11_565  N
  Ca2       O1              3.4288(23)  .    104_656  N
  Ca2       O1              3.4288(23)  .    117_645  N
  Ca2       Ca2             3.8333(22)  .      2_546  N
  Ca2       Ca2             3.8333(22)  .      3_645  N
  Ca2       Ca2             5.2883(15)  .      4_566  N
  Ca2       Ca2              4.429(11)  .      6_755  N
  Ca2       Ca2             3.8333(22)  .     11_565  N
  Ca2       Ca2             5.2883(15)  .     13_646  N
  Ca2       Ca2             5.2883(15)  .     17_534  N
  Ca2       Ca2             5.2883(15)  .    104_656  N
  Ca2       Ca2             3.8333(22)  .    112_646  N
  Ca2       O3               2.182(18)  .      3_655  N
  Ca2       O3               3.830(20)  .      5_546  N
  Ca2       O3               2.295(19)  .     13_645  N
  Ca2       O3               3.830(20)  .     14_555  N
  Ca2       O3               3.872(28)  .    107_655  N
  Ca2       O3               2.182(18)  .    119_656  N
  Ca2       O3               2.295(19)  .    120_655  N
  Ca2       O3               3.872(28)  .    123_656  N
  O3        Ca1              3.873(29)  .      1_554  N
  O3        Ca1              2.770(18)  .      2_545  N
  O3        Ca1              2.883(18)  .      4_565  N
  O3        Ca1              4.046(15)  .     14_654  N
  O3        Ca1              3.512(17)  .    105_655  N
  O3        Ca1              3.609(29)  .    107_654  N
  O3        Ca2              2.182(18)  .      2_545  N
  O3        Ca2              2.295(19)  .      4_565  N
  O3        Ca2              3.830(20)  .    105_655  N
  O3        Ca2              3.872(28)  .    107_654  N
  O3        O3               0.476(12)  .     14_554  N
  O3        O3               0.476(12)  .    121_555  N
  O3        O3               0.653(16)  .    123_655  N

loop_
      _geom_angle_atom_site_label_1
      _geom_angle_atom_site_label_2
      _geom_angle_atom_site_label_3
      _geom_angle
      _geom_angle_site_symmetry_1
      _geom_angle_site_symmetry_2
      _geom_angle_site_symmetry_3
      _geom_angle_publ_flag
  Ca1       Ca1       Ca1                   60.0      2_546  .      3_645  N
  Ca1       Ca1       Ca1            125.414(27)      2_546  .     11_565  N
  Ca1       Ca1       Ca1             145.720(6)      2_546  .    112_647  N
  Ca1       Ca1       Al1             99.052(26)      2_546  .      4_566  N
  Ca1       Ca1       Al1              54.220(7)      2_546  .     16_435  N
  Ca1       Ca1       Al2             62.707(14)      2_546  .      2_546  N
  Ca1       Ca1       O2              40.370(10)      2_546  .      1_555  N
  Ca1       Ca1       O2             164.963(28)      2_546  .     10_556  N
  Ca1       Ca1       O1               79.962(9)      2_546  .      1_555  N
  Ca1       Ca1       O1               39.254(7)      2_546  .      2_546  N
  Ca1       Ca1       O1             102.615(23)      2_546  .     10_556  N
  Ca1       Ca1       O1              90.299(25)      2_546  .     11_565  N
  Ca1       Ca1       Ca2            117.293(14)      2_546  .      1_555  N
  Ca1       Ca1       Ca2                9.08(8)      2_546  .      2_546  N
  Ca1       Ca1       Ca2              123.16(5)      2_546  .     11_565  N
  Ca1       Ca1       O3                123.3(4)      2_546  .      3_655  N
  Ca1       Ca1       O3              111.22(34)      2_546  .    119_547  N
  Ca1       Ca1       Ca1             145.720(6)      3_645  .     11_565  N
  Ca1       Ca1       Ca1            138.316(28)      3_645  .    112_647  N
  Ca1       Ca1       Al1            156.383(19)      3_645  .      4_566  N
  Ca1       Ca1       Al1              54.221(7)      3_645  .     16_435  N
  Ca1       Ca1       Al2            110.842(14)      3_645  .      2_546  N
  Ca1       Ca1       O2              40.371(10)      3_645  .      1_555  N
  Ca1       Ca1       O2             127.133(31)      3_645  .     10_556  N
  Ca1       Ca1       O1              43.110(17)      3_645  .      1_555  N
  Ca1       Ca1       O1               77.843(8)      3_645  .      2_546  N
  Ca1       Ca1       O1             134.093(10)      3_645  .     10_556  N
  Ca1       Ca1       O1             143.839(24)      3_645  .     11_565  N
  Ca1       Ca1       Ca2             69.158(14)      3_645  .      1_555  N
  Ca1       Ca1       Ca2               67.28(6)      3_645  .      2_546  N
  Ca1       Ca1       Ca2              136.72(8)      3_645  .     11_565  N
  Ca1       Ca1       O3                 72.2(6)      3_645  .      3_655  N
  Ca1       Ca1       O3                 66.3(6)      3_645  .    119_547  N
  Ca1       Ca1       Ca1                   60.0     11_565  .    112_647  N
  Ca1       Ca1       Al1              54.221(7)     11_565  .      4_566  N
  Ca1       Ca1       Al1             99.052(26)     11_565  .     16_435  N
  Ca1       Ca1       Al2             62.707(14)     11_565  .      2_546  N
  Ca1       Ca1       O2             164.963(28)     11_565  .      1_555  N
  Ca1       Ca1       O2              40.370(10)     11_565  .     10_556  N
  Ca1       Ca1       O1             102.615(23)     11_565  .      1_555  N
  Ca1       Ca1       O1              90.299(25)     11_565  .      2_546  N
  Ca1       Ca1       O1               79.962(9)     11_565  .     10_556  N
  Ca1       Ca1       O1               39.254(7)     11_565  .     11_565  N
  Ca1       Ca1       Ca2            117.293(14)     11_565  .      1_555  N
  Ca1       Ca1       Ca2              123.16(5)     11_565  .      2_546  N
  Ca1       Ca1       Ca2                9.08(8)     11_565  .     11_565  N
  Ca1       Ca1       O3              111.22(34)     11_565  .      3_655  N
  Ca1       Ca1       O3                123.3(4)     11_565  .    119_547  N
  Ca1       Ca1       Al1              54.220(7)    112_656  .      4_566  N
  Ca1       Ca1       Al1            156.383(19)    112_656  .     16_435  N
  Ca1       Ca1       Al2            110.842(14)    112_557  .      2_546  N
  Ca1       Ca1       O2             127.133(31)    112_556  .      1_555  N
  Ca1       Ca1       O2              40.371(10)    112_556  .     10_556  N
  Ca1       Ca1       O1             134.093(10)    112_646  .      1_555  N
  Ca1       Ca1       O1             143.839(24)    112_646  .      2_546  N
  Ca1       Ca1       O1              43.110(17)    112_646  .     10_556  N
  Ca1       Ca1       O1               77.843(8)    112_646  .     11_565  N
  Ca1       Ca1       Ca2             69.158(14)    112_556  .      1_555  N
  Ca1       Ca1       Ca2              136.72(8)    112_556  .      2_546  N
  Ca1       Ca1       Ca2               67.28(6)    112_556  .     11_565  N
  Ca1       Ca1       O3                 66.3(6)    112_547  .      3_655  N
  Ca1       Ca1       O3                 72.2(6)    112_547  .    119_547  N
  Al1       Ca1       Al1            124.455(27)      4_566  .     16_435  N
  Al1       Ca1       Al2             62.228(13)      4_566  .      2_546  N
  Al1       Ca1       O2             116.765(11)      4_566  .      1_555  N
  Al1       Ca1       O2              75.927(14)      4_566  .     10_556  N
  Al1       Ca1       O1             150.994(30)      4_566  .      1_555  N
  Al1       Ca1       O1              92.535(23)      4_566  .      2_546  N
  Al1       Ca1       O1              33.926(10)      4_566  .     10_556  N
  Al1       Ca1       O1               34.332(9)      4_566  .     11_565  N
  Al1       Ca1       Ca2            117.772(13)      4_566  .      1_555  N
  Al1       Ca1       Ca2               90.91(9)      4_566  .      2_546  N
  Al1       Ca1       Ca2               62.39(7)      4_566  .     11_565  N
  Al1       Ca1       O3                117.4(7)      4_566  .      3_655  N
  Al1       Ca1       O3                117.7(7)      4_566  .    119_547  N
  Al1       Ca1       Al2             62.227(13)     16_435  .      2_546  N
  Al1       Ca1       O2              75.927(14)     16_435  .      1_555  N
  Al1       Ca1       O2             116.766(11)     16_435  .     10_556  N
  Al1       Ca1       O1              33.928(10)     16_435  .      1_555  N
  Al1       Ca1       O1               34.331(9)     16_435  .      2_546  N
  Al1       Ca1       O1             150.992(30)     16_435  .     10_556  N
  Al1       Ca1       O1              92.534(23)     16_435  .     11_565  N
  Al1       Ca1       Ca2            117.773(13)     16_435  .      1_555  N
  Al1       Ca1       Ca2               62.39(7)     16_435  .      2_546  N
  Al1       Ca1       Ca2               90.91(9)     16_435  .     11_565  N
  Al1       Ca1       O3                117.7(7)     16_435  .      3_655  N
  Al1       Ca1       O3                117.4(7)     16_435  .    119_547  N
  Al2       Ca1       O2             102.845(20)      2_546  .      1_555  N
  Al2       Ca1       O2             102.845(20)      2_546  .     10_556  N
  Al2       Ca1       O1              92.756(22)      2_546  .      1_555  N
  Al2       Ca1       O1              33.001(12)      2_546  .      2_546  N
  Al2       Ca1       O1              92.756(22)      2_546  .     10_556  N
  Al2       Ca1       O1              33.001(12)      2_546  .     11_565  N
  Al2       Ca1       Ca2                179.972      2_546  .      1_555  N
  Al2       Ca1       Ca2             61.292(20)      2_546  .      2_546  N
  Al2       Ca1       Ca2             61.292(20)      2_546  .     11_565  N
  Al2       Ca1       O3              173.23(16)      2_546  .      3_655  N
  Al2       Ca1       O3              173.23(16)      2_546  .    119_547  N
  O2        Ca1       O2               154.31(4)      1_555  .     10_556  N
  O2        Ca1       O1              81.273(13)      1_555  .      1_555  N
  O2        Ca1       O1              77.558(15)      1_555  .      2_546  N
  O2        Ca1       O1              97.489(14)      1_555  .     10_556  N
  O2        Ca1       O1             126.041(24)      1_555  .     11_565  N
  O2        Ca1       Ca2             77.155(20)      1_555  .      1_555  N
  O2        Ca1       Ca2             41.919(18)      1_555  .      2_546  N
  O2        Ca1       Ca2              163.27(6)      1_555  .     11_565  N
  O2        Ca1       O3               83.42(31)      1_555  .      3_655  N
  O2        Ca1       O3               70.91(32)      1_555  .    119_547  N
  O2        Ca1       O1              97.489(14)     10_556  .      1_555  N
  O2        Ca1       O1             126.041(24)     10_556  .      2_546  N
  O2        Ca1       O1              81.273(13)     10_556  .     10_556  N
  O2        Ca1       O1              77.558(15)     10_556  .     11_565  N
  O2        Ca1       Ca2             77.155(20)     10_556  .      1_555  N
  O2        Ca1       Ca2              163.27(6)     10_556  .      2_546  N
  O2        Ca1       Ca2             41.919(18)     10_556  .     11_565  N
  O2        Ca1       O3               70.91(32)     10_556  .      3_655  N
  O2        Ca1       O3               83.42(31)     10_556  .    119_547  N
  O1        Ca1       O1              68.216(19)      1_555  .      2_546  N
  O1        Ca1       O1               174.49(4)      1_555  .     10_556  N
  O1        Ca1       O1             116.857(26)      1_555  .     11_565  N
  O1        Ca1       Ca2             87.244(22)      1_555  .      1_555  N
  O1        Ca1       Ca2               89.03(8)      1_555  .      2_546  N
  O1        Ca1       Ca2              93.62(10)      1_555  .     11_565  N
  O1        Ca1       O3                 85.6(7)      1_555  .      3_655  N
  O1        Ca1       O3                 88.9(7)      1_555  .    119_547  N
  O1        Ca1       O1             116.857(26)      2_546  .     10_556  N
  O1        Ca1       O1              66.001(23)      2_546  .     11_565  N
  O1        Ca1       Ca2            146.999(12)      2_546  .      1_555  N
  O1        Ca1       Ca2               42.98(4)      2_546  .      2_546  N
  O1        Ca1       Ca2               85.75(6)      2_546  .     11_565  N
  O1        Ca1       O3                149.5(7)      2_546  .      3_655  N
  O1        Ca1       O3                143.5(6)      2_546  .    119_547  N
  O1        Ca1       O1              68.216(19)     10_556  .     11_565  N
  O1        Ca1       Ca2             87.244(22)     10_556  .      1_555  N
  O1        Ca1       Ca2              93.62(10)     10_556  .      2_546  N
  O1        Ca1       Ca2               89.03(8)     10_556  .     11_565  N
  O1        Ca1       O3                 88.9(7)     10_556  .      3_655  N
  O1        Ca1       O3                 85.6(7)     10_556  .    119_547  N
  O1        Ca1       Ca2            146.999(12)     11_565  .      1_555  N
  O1        Ca1       Ca2               85.75(6)     11_565  .      2_546  N
  O1        Ca1       Ca2               42.98(4)     11_565  .     11_565  N
  O1        Ca1       O3                143.5(6)     11_565  .      3_655  N
  O1        Ca1       O3                149.5(7)     11_565  .    119_547  N
  Ca2       Ca1       Ca2            118.708(20)      1_555  .      2_546  N
  Ca2       Ca1       Ca2            118.708(20)      1_555  .     11_565  N
  Ca2       Ca1       O3                6.77(16)      1_555  .      3_655  N
  Ca2       Ca1       O3                6.77(16)      1_555  .    119_547  N
  Ca2       Ca1       Ca2              122.58(4)      2_546  .     11_565  N
  Ca2       Ca1       O3              125.17(27)      2_546  .      3_655  N
  Ca2       Ca1       O3              112.21(26)      2_546  .    119_547  N
  Ca2       Ca1       O3              112.21(26)     11_565  .      3_655  N
  Ca2       Ca1       O3              125.17(27)     11_565  .    119_547  N
  O3        Ca1       O3               13.54(32)      3_655  .    119_547  N
  Ca1       Al1       Ca1             71.559(14)     13_646  .     14_655  N
  Ca1       Al1       Ca1             71.558(14)     13_646  .     15_556  N
  Ca1       Al1       O2              137.537(9)     13_646  .      1_555  N
  Ca1       Al1       O1              53.687(20)     13_646  .    116_535  N
  Ca1       Al1       O1              47.591(19)     13_646  .    117_634  N
  Ca1       Al1       O1             105.515(28)     13_646  .    118_544  N
  Ca1       Al1       Ca2              102.09(8)     13_646  .      1_555  N
  Ca1       Al1       Ca2              166.02(8)     13_646  .      2_546  N
  Ca1       Al1       Ca2            119.003(33)     13_646  .      3_645  N
  Ca1       Al1       Ca1             71.559(14)     14_655  .     15_556  N
  Ca1       Al1       O2              137.538(9)     14_655  .      1_555  N
  Ca1       Al1       O1             105.514(28)     14_655  .    116_535  N
  Ca1       Al1       O1              53.687(20)     14_655  .    117_634  N
  Ca1       Al1       O1              47.592(19)     14_655  .    118_544  N
  Ca1       Al1       Ca2            119.005(33)     14_655  .      1_555  N
  Ca1       Al1       Ca2              102.09(8)     14_655  .      2_546  N
  Ca1       Al1       Ca2              166.02(8)     14_655  .      3_645  N
  Ca1       Al1       O2              137.536(9)     15_556  .      1_555  N
  Ca1       Al1       O1              47.591(19)     15_556  .    116_535  N
  Ca1       Al1       O1             105.514(28)     15_556  .    117_634  N
  Ca1       Al1       O1              53.686(20)     15_556  .    118_544  N
  Ca1       Al1       Ca2              166.02(8)     15_556  .      1_555  N
  Ca1       Al1       Ca2            119.003(33)     15_556  .      2_546  N
  Ca1       Al1       Ca2              102.09(8)     15_556  .      3_645  N
  O2        Al1       O1             116.836(21)      1_555  .    116_535  N
  O2        Al1       O1             116.838(21)      1_555  .    117_634  N
  O2        Al1       O1             116.837(21)      1_555  .    118_544  N
  O2        Al1       Ca2               41.22(5)      1_555  .      1_555  N
  O2        Al1       Ca2               41.22(5)      1_555  .      2_546  N
  O2        Al1       Ca2               41.22(5)      1_555  .      3_645  N
  O1        Al1       O1             101.203(26)    116_535  .    117_634  N
  O1        Al1       O1             101.201(26)    116_535  .    118_544  N
  O1        Al1       Ca2              118.53(8)    116_445  .      1_555  N
  O1        Al1       Ca2              139.95(9)    116_445  .      2_546  N
  O1        Al1       Ca2               77.03(4)    116_445  .      3_645  N
  O1        Al1       O1             101.204(26)    117_634  .    118_544  N
  O1        Al1       Ca2               77.03(4)    117_544  .      1_555  N
  O1        Al1       Ca2              118.53(8)    117_544  .      2_546  N
  O1        Al1       Ca2              139.96(9)    117_544  .      3_645  N
  O1        Al1       Ca2              139.96(9)    118_454  .      1_555  N
  O1        Al1       Ca2               77.03(4)    118_454  .      2_546  N
  O1        Al1       Ca2              118.53(8)    118_454  .      3_645  N
  Ca2       Al1       Ca2               69.59(8)      1_555  .      2_546  N
  Ca2       Al1       Ca2               69.59(8)      1_555  .      3_645  N
  Ca2       Al1       Ca2               69.59(8)      2_546  .      3_645  N
  Ca1       Al2       Ca1                  180.0      3_645  .      5_646  N
  Ca1       Al2       O1              52.569(11)      3_645  .      1_555  N
  Ca1       Al2       O1              52.569(11)      3_645  .      7_745  N
  Ca1       Al2       O1             127.431(11)      3_645  .    104_655  N
  Ca1       Al2       O1             127.431(11)      3_645  .    113_635  N
  Ca1       Al2       O1             127.431(11)      5_646  .      1_555  N
  Ca1       Al2       O1             127.431(11)      5_646  .      7_745  N
  Ca1       Al2       O1              52.569(11)      5_646  .    104_655  N
  Ca1       Al2       O1              52.569(11)      5_646  .    113_635  N
  O1        Al2       O1             105.139(22)      1_555  .      7_745  N
  O1        Al2       O1             111.680(12)      1_555  .    104_655  N
  O1        Al2       O1             111.680(12)      1_555  .    113_635  N
  O1        Al2       O1             111.680(12)      7_745  .    104_655  N
  O1        Al2       O1             111.680(12)      7_745  .    113_635  N
  O1        Al2       O1             105.139(22)    104_655  .    113_635  N
  Ca1       O2        Ca1             99.259(19)      1_555  .      2_546  N
  Ca1       O2        Ca1             99.259(19)      1_555  .      3_645  N
  Ca1       O2        Al1            118.390(15)      1_555  .      1_555  N
  Ca1       O2        Ca2              14.22(12)      1_555  .      1_555  N
  Ca1       O2        Ca2             94.843(33)      1_555  .      2_546  N
  Ca1       O2        Ca2             113.39(13)      1_555  .      3_645  N
  Ca1       O2        Ca1             99.258(19)      2_546  .      3_645  N
  Ca1       O2        Al1            118.390(15)      2_546  .      1_555  N
  Ca1       O2        Ca2             113.39(13)      2_546  .      1_555  N
  Ca1       O2        Ca2              14.22(12)      2_546  .      2_546  N
  Ca1       O2        Ca2             94.842(33)      2_546  .      3_645  N
  Ca1       O2        Al1            118.390(15)      3_645  .      1_555  N
  Ca1       O2        Ca2             94.842(33)      3_645  .      1_555  N
  Ca1       O2        Ca2             113.39(13)      3_645  .      2_546  N
  Ca1       O2        Ca2              14.22(12)      3_645  .      3_645  N
  Al1       O2        Ca2              110.00(8)      1_555  .      1_555  N
  Al1       O2        Ca2              110.00(8)      1_555  .      2_546  N
  Al1       O2        Ca2              110.00(8)      1_555  .      3_645  N
  Ca2       O2        Ca2              108.93(9)      1_555  .      2_546  N
  Ca2       O2        Ca2              108.93(9)      1_555  .      3_645  N
  Ca2       O2        Ca2              108.93(9)      2_546  .      3_645  N
  Ca1       O1        Ca1             97.636(19)      1_555  .      3_645  N
  Ca1       O1        Al1             98.482(26)      1_555  .     16_435  N
  Ca1       O1        Al2            122.483(23)      1_555  .      1_555  N
  Ca1       O1        Ca2              14.32(11)      1_555  .      1_555  N
  Ca1       O1        Al1             91.982(19)      3_645  .     16_435  N
  Ca1       O1        Al2             94.430(17)      3_645  .      1_555  N
  Ca1       O1        Ca2               90.78(7)      3_645  .      1_555  N
  Al1       O1        Al2            137.086(25)     16_435  .      1_555  N
  Al1       O1        Ca2             111.40(12)     16_435  .      1_555  N
  Al2       O1        Ca2             110.88(11)      1_555  .      1_555  N
  Ca1       Ca2       Ca1              101.76(9)      1_555  .      3_645  N
  Ca1       Ca2       Ca1              101.76(9)      1_555  .    112_647  N
  Ca1       Ca2       Al1              106.20(9)      1_555  .      1_555  N
  Ca1       Ca2       Al1              106.20(9)      1_555  .     10_556  N
  Ca1       Ca2       O2               88.63(13)      1_555  .      1_555  N
  Ca1       Ca2       O2               88.63(13)      1_555  .     10_556  N
  Ca1       Ca2       O1               78.43(13)      1_555  .      1_555  N
  Ca1       Ca2       O1               78.43(13)      1_555  .     10_556  N
  Ca1       Ca2       Ca2               53.49(8)      1_555  .      2_546  N
  Ca1       Ca2       Ca2              100.76(9)      1_555  .      3_645  N
  Ca1       Ca2       Ca2               53.49(8)      1_555  .     11_565  N
  Ca1       Ca2       Ca2              100.76(9)      1_555  .    112_556  N
  Ca1       Ca2       O3              171.39(20)      1_555  .      3_655  N
  Ca1       Ca2       O3              171.82(23)      1_555  .     13_645  N
  Ca1       Ca2       O3              171.39(20)      1_555  .    119_547  N
  Ca1       Ca2       O3              171.82(23)      1_555  .    120_556  N
  Ca1       Ca2       Ca1             156.48(18)      3_645  .    112_647  N
  Ca1       Ca2       Al1             62.554(20)      3_645  .      1_555  N
  Ca1       Ca2       Al1              110.32(7)      3_645  .     10_556  N
  Ca1       Ca2       O2              43.239(15)      3_645  .      1_555  N
  Ca1       Ca2       O2               137.58(6)      3_645  .     10_556  N
  Ca1       Ca2       O1              46.240(30)      3_645  .      1_555  N
  Ca1       Ca2       O1             140.659(11)      3_645  .     10_556  N
  Ca1       Ca2       Ca2               65.57(4)      3_645  .      2_546  N
  Ca1       Ca2       Ca2                7.80(6)      3_645  .      3_645  N
  Ca1       Ca2       Ca2             131.00(15)      3_645  .     11_565  N
  Ca1       Ca2       Ca2             156.15(15)      3_645  .    112_556  N
  Ca1       Ca2       O3                 82.1(8)      3_645  .      3_655  N
  Ca1       Ca2       O3                 70.9(4)      3_645  .     13_645  N
  Ca1       Ca2       O3                 74.6(8)      3_645  .    119_547  N
  Ca1       Ca2       O3                 85.6(4)      3_645  .    120_556  N
  Ca1       Ca2       Al1              110.32(7)    112_656  .      1_555  N
  Ca1       Ca2       Al1             62.554(20)    112_656  .     10_556  N
  Ca1       Ca2       O2               137.58(6)    112_556  .      1_555  N
  Ca1       Ca2       O2              43.239(15)    112_556  .     10_556  N
  Ca1       Ca2       O1             140.659(11)    112_646  .      1_555  N
  Ca1       Ca2       O1              46.240(30)    112_646  .     10_556  N
  Ca1       Ca2       Ca2             131.00(15)    112_556  .      2_546  N
  Ca1       Ca2       Ca2             156.15(15)    112_556  .      3_645  N
  Ca1       Ca2       Ca2               65.57(4)    112_556  .     11_565  N
  Ca1       Ca2       Ca2                7.80(6)    112_556  .    112_556  N
  Ca1       Ca2       O3                 74.6(8)    112_547  .      3_655  N
  Ca1       Ca2       O3                 85.6(4)    112_547  .     13_645  N
  Ca1       Ca2       O3                 82.1(8)    112_547  .    119_547  N
  Ca1       Ca2       O3                 70.9(4)    112_547  .    120_556  N
  Al1       Ca2       Al1             147.60(18)      1_555  .     10_556  N
  Al1       Ca2       O2              28.775(34)      1_555  .      1_555  N
  Al1       Ca2       O2              152.86(12)      1_555  .     10_556  N
  Al1       Ca2       O1             107.187(22)      1_555  .      1_555  N
  Al1       Ca2       O1              79.420(20)      1_555  .     10_556  N
  Al1       Ca2       Ca2               55.20(4)      1_555  .      2_546  N
  Al1       Ca2       Ca2               55.20(4)      1_555  .      3_645  N
  Al1       Ca2       Ca2              154.51(8)      1_555  .     11_565  N
  Al1       Ca2       Ca2             117.80(13)      1_555  .    112_556  N
  Al1       Ca2       O3               82.41(22)      1_555  .      3_655  N
  Al1       Ca2       O3                 74.1(9)      1_555  .     13_645  N
  Al1       Ca2       O3               65.19(23)      1_555  .    119_547  N
  Al1       Ca2       O3                 73.9(8)      1_555  .    120_556  N
  Al1       Ca2       O2              152.86(12)     10_556  .      1_555  N
  Al1       Ca2       O2              28.775(34)     10_556  .     10_556  N
  Al1       Ca2       O1              79.420(20)     10_556  .      1_555  N
  Al1       Ca2       O1             107.187(22)     10_556  .     10_556  N
  Al1       Ca2       Ca2              154.51(8)     10_556  .      2_546  N
  Al1       Ca2       Ca2             117.80(13)     10_556  .      3_645  N
  Al1       Ca2       Ca2               55.20(4)     10_556  .     11_565  N
  Al1       Ca2       Ca2               55.20(4)     10_556  .    112_556  N
  Al1       Ca2       O3               65.19(23)     10_556  .      3_655  N
  Al1       Ca2       O3                 73.9(8)     10_556  .     13_645  N
  Al1       Ca2       O3               82.41(22)     10_556  .    119_547  N
  Al1       Ca2       O3                 74.1(9)     10_556  .    120_556  N
  O2        Ca2       O2              177.26(27)      1_555  .     10_556  N
  O2        Ca2       O1              81.568(29)      1_555  .      1_555  N
  O2        Ca2       O1                97.88(4)      1_555  .     10_556  N
  O2        Ca2       Ca2               35.53(4)      1_555  .      2_546  N
  O2        Ca2       Ca2               35.53(4)      1_555  .      3_645  N
  O2        Ca2       Ca2             141.75(22)      1_555  .     11_565  N
  O2        Ca2       Ca2             145.36(12)      1_555  .    112_556  N
  O2        Ca2       O3                 99.3(4)      1_555  .      3_655  N
  O2        Ca2       O3                 88.2(8)      1_555  .     13_645  N
  O2        Ca2       O3                 83.4(4)      1_555  .    119_547  N
  O2        Ca2       O3                 94.5(8)      1_555  .    120_556  N
  O2        Ca2       O1                97.88(4)     10_556  .      1_555  N
  O2        Ca2       O1              81.568(29)     10_556  .     10_556  N
  O2        Ca2       Ca2             141.75(22)     10_556  .      2_546  N
  O2        Ca2       Ca2             145.36(12)     10_556  .      3_645  N
  O2        Ca2       Ca2               35.53(4)     10_556  .     11_565  N
  O2        Ca2       Ca2               35.53(4)     10_556  .    112_556  N
  O2        Ca2       O3                 83.4(4)     10_556  .      3_655  N
  O2        Ca2       O3                 94.5(8)     10_556  .     13_645  N
  O2        Ca2       O3                 99.3(4)     10_556  .    119_547  N
  O2        Ca2       O3                 88.2(8)     10_556  .    120_556  N
  O1        Ca2       O1              156.86(26)      1_555  .     10_556  N
  O1        Ca2       Ca2             81.069(10)      1_555  .      2_546  N
  O1        Ca2       Ca2               52.75(8)      1_555  .      3_645  N
  O1        Ca2       Ca2              85.22(17)      1_555  .     11_565  N
  O1        Ca2       Ca2              132.86(7)      1_555  .    112_556  N
  O1        Ca2       O3                 99.4(9)      1_555  .      3_655  N
  O1        Ca2       O3               93.63(34)      1_555  .     13_645  N
  O1        Ca2       O3                103.5(9)      1_555  .    119_547  N
  O1        Ca2       O3                109.5(4)      1_555  .    120_556  N
  O1        Ca2       Ca2              85.22(17)     10_556  .      2_546  N
  O1        Ca2       Ca2              132.86(7)     10_556  .      3_645  N
  O1        Ca2       Ca2             81.069(10)     10_556  .     11_565  N
  O1        Ca2       Ca2               52.75(8)     10_556  .    112_556  N
  O1        Ca2       O3                103.5(9)     10_556  .      3_655  N
  O1        Ca2       O3                109.5(4)     10_556  .     13_645  N
  O1        Ca2       O3                 99.4(9)     10_556  .    119_547  N
  O1        Ca2       O3               93.63(34)     10_556  .    120_556  N
  Ca2       Ca2       Ca2                   60.0      2_546  .      3_645  N
  Ca2       Ca2       Ca2             106.98(15)      2_546  .     11_565  N
  Ca2       Ca2       Ca2             136.24(12)      2_546  .    112_556  N
  Ca2       Ca2       O3                134.7(4)      2_546  .      3_655  N
  Ca2       Ca2       O3                123.8(8)      2_546  .     13_645  N
  Ca2       Ca2       O3              118.23(32)      2_546  .    119_547  N
  Ca2       Ca2       O3                128.5(8)      2_546  .    120_556  N
  Ca2       Ca2       Ca2             136.24(12)      3_645  .     11_565  N
  Ca2       Ca2       Ca2             158.47(18)      3_645  .    112_556  N
  Ca2       Ca2       O3                 84.1(7)      3_645  .      3_655  N
  Ca2       Ca2       O3                 72.5(5)      3_645  .     13_645  N
  Ca2       Ca2       O3                 74.5(8)      3_645  .    119_547  N
  Ca2       Ca2       O3                 86.0(5)      3_645  .    120_556  N
  Ca2       Ca2       Ca2                   60.0     11_565  .    112_556  N
  Ca2       Ca2       O3              118.23(32)     11_565  .      3_655  N
  Ca2       Ca2       O3                128.5(8)     11_565  .     13_645  N
  Ca2       Ca2       O3                134.7(4)     11_565  .    119_547  N
  Ca2       Ca2       O3                123.8(8)     11_565  .    120_556  N
  Ca2       Ca2       O3                 74.5(8)    112_547  .      3_655  N
  Ca2       Ca2       O3                 86.0(5)    112_547  .     13_645  N
  Ca2       Ca2       O3                 84.1(7)    112_547  .    119_547  N
  Ca2       Ca2       O3                 72.5(5)    112_547  .    120_556  N
  O3        Ca2       O3               11.85(29)      3_655  .     13_645  N
  O3        Ca2       O3                 17.2(4)      3_655  .    119_547  N
  O3        Ca2       O3               11.85(29)      3_655  .    120_556  N
  O3        Ca2       O3               11.85(29)     13_645  .    119_547  N
  O3        Ca2       O3                 16.4(5)     13_645  .    120_556  N
  O3        Ca2       O3               11.85(29)    119_547  .    120_556  N
  Ca1       O3        Ca2                1.84(5)      2_545  .      2_545  N
  Ca1       O3        Ca2               165.0(4)      2_545  .      4_565  N
  Ca1       O3        O3                   99(4)      2_545  .     14_554  N
  Ca1       O3        O3                   99(4)      2_545  .    121_546  N
  Ca1       O3        O3               83.23(16)      2_545  .    123_645  N
  Ca2       O3        Ca2               163.2(4)      2_545  .      4_565  N
  Ca2       O3        O3                   98(4)      2_545  .     14_554  N
  Ca2       O3        O3                   98(4)      2_545  .    121_546  N
  Ca2       O3        O3               81.39(20)      2_545  .    123_645  N
  Ca2       O3        O3                   70(4)      4_565  .     14_554  N
  Ca2       O3        O3                   70(4)      4_565  .    121_546  N
  Ca2       O3        O3               81.82(23)      4_565  .    123_645  N
  O3        O3        O3                86.7(20)     14_554  .    121_546  N
  O3        O3        O3                46.7(10)     14_554  .    123_645  N
  O3        O3        O3                46.7(10)    121_546  .    123_645  N

# Information for phase 2
data_C12A7-ST_RT_phase_2

_pd_block_id
  2006-06-05T13:03|C12A7-ST_RT_phase2|Luis||

# Histograms for phase 2
loop_   _pd_block_diffractogram_id
  2006-06-05T13:03|C12A7-ST_RT_H_01|Luis|HRPT
  2006-06-05T13:03|C12A7-ST_RT_H_02|Luis|ID31

#==============================================================================
# 7. CHEMICAL, STRUCTURAL AND CRYSTAL DATA

_pd_char_particle_morphology      ?

_chemical_name_systematic
; ?
;
_chemical_name_common             ?
_chemical_formula_moiety          ?
_chemical_formula_structural      ?
_chemical_formula_analytical      ?
_chemical_melting_point           ?
_chemical_compound_source         ?       # for minerals and
                                          # natural products
_symmetry_space_group_name_Hall   ?

_exptl_crystal_F_000               ?
_exptl_crystal_density_diffrn      ?
_exptl_crystal_density_meas        ?
_exptl_crystal_density_method      ?

_cell_measurement_temperature     ?

_cell_special_details
; ?
;

_geom_special_details             ?

# The following item identifies the program(s) used (if appropriate).
_computing_structure_solution     ?

#==============================================================================

# 8. Phase information from GSAS

_pd_phase_name                         CA
_cell_length_a                         8.69417(20)
_cell_length_b                         8.09299(19)
_cell_length_c                         15.20965(32)
_cell_angle_alpha                      90.0
_cell_angle_beta                       90.1665(19)
_cell_angle_gamma                      90.0
_cell_volume                           1070.174(29)
_symmetry_cell_setting                 monoclinic
_symmetry_space_group_name_H-M         "P 1 21/n 1"
loop_ _symmetry_equiv_pos_site_id _symmetry_equiv_pos_as_xyz
       1 +x,+y,+z 
       2 -x+1/2,+y+1/2,-z+1/2 
      -1 -x,-y,-z 
      -2 +x+1/2,-y+1/2,+z+1/2 

# ATOMIC COORDINATES AND DISPLACEMENT PARAMETERS


loop_
      _atom_site_type_symbol
      _atom_site_label
      _atom_site_fract_x
      _atom_site_fract_y
      _atom_site_fract_z
      _atom_site_occupancy
      _atom_site_thermal_displace_type
      _atom_site_U_iso_or_equiv
      _atom_site_symmetry_multiplicity
Ca
Ca1     0.2388       0.0343       0.0893       1.0        Uiso   0.007         4
Ca
Ca2     0.2686       0.4702       0.0709       1.0        Uiso   0.007         4
Ca
Ca3     0.7396       0.5286       0.247        1.0        Uiso   0.01          4
Al
Al1     0.4241       0.3268       0.2385       1.0        Uiso   0.006         4
Al
Al2     0.4192       0.7244       0.2329       1.0        Uiso   0.006         4
Al
Al3     0.5987       0.8289       0.0781       1.0        Uiso   0.006         4
Al
Al4     0.6126       0.2193       0.0806       1.0        Uiso   0.007         4
Al
Al5     0.9352       0.7276       0.0917       1.0        Uiso   0.006         4
Al
Al6     0.94         0.3341       0.0921       1.0        Uiso   0.007         4
O 
O1      0.077        0.24         0.023        1.0        Uiso   0.006         4
O 
O2      0.016        0.532        0.111        1.0        Uiso   0.007         4
O 
O3      0.054        0.863        0.149        1.0        Uiso   0.007         4
O 
O4      0.246        0.246        0.204        1.0        Uiso   0.004         4
O 
O5      0.436        0.26         0.027        1.0        Uiso   0.006         4
O 
O6      0.43         0.853        0.141        1.0        Uiso   0.006         4
O 
O7      0.433        0.524        0.189        1.0        Uiso   0.007         4
O 
O8      0.583        0.227        0.195        1.0        Uiso   0.006         4
O 
O9      0.679        0.024        0.055        1.0        Uiso   0.006         4
O 
O10     0.756        0.355        0.047        1.0        Uiso   0.005         4
O 
O11     0.748        0.727        0.134        1.0        Uiso   0.007         4
O 
O12     0.922        0.245        0.197        1.0        Uiso   0.005         4

loop_ _atom_type_symbol
      _atom_type_number_in_cell
                   Ca 12.0        
                   Al 24.0        
                   O_ 48.0        
 
# If you change Z, be sure to change all 3 of the following
_chemical_formula_sum                  "Al2 Ca O4"
_chemical_formula_weight               158.04
_cell_formula_units_Z                  12

# MOLECULAR GEOMETRY

loop_
      _geom_bond_atom_site_label_1
      _geom_bond_atom_site_label_2
      _geom_bond_distance
      _geom_bond_site_symmetry_1
      _geom_bond_site_symmetry_2
      _geom_bond_publ_flag
  Ca1       Ca2             3.54835(8)  .      1_555  N
  Ca1       Al1             3.65068(6)  .      1_555  N
  Ca1       Al1             3.42157(6)  .      2_545  N
  Ca1       Al2             3.67431(6)  .      1_545  N
  Ca1       Al2             3.40420(6)  .      2_545  N
  Ca1       Al3             3.54770(7)  .      1_545  N
  Ca1       Al3             3.11853(6)  .     -1_665  N
  Ca1       Al4             3.58097(7)  .      1_555  N
  Ca1       Al4             3.54662(6)  .     -1_655  N
  Ca1       Al5             3.62354(6)  .      1_445  N
  Ca1       Al5             3.68186(6)  .     -1_665  N
  Ca1       Al6             3.55499(6)  .      1_455  N
  Ca1       O1              2.39975(4)  .      1_555  N
  Ca1       O3              2.31005(4)  .      1_545  N
  Ca1       O4              2.44583(4)  .      1_555  N
  Ca1       O5              2.68015(4)  .      1_555  N
  Ca1       O6              2.35094(4)  .      1_545  N
  Ca1       O9              2.35784(5)  .     -1_655  N
  Ca2       Ca1             3.54835(8)  .      1_555  N
  Ca2       Al1             3.10687(6)  .      1_555  N
  Ca2       Al2             3.46395(6)  .      1_555  N
  Ca2       Al3             3.51304(6)  .     -1_665  N
  Ca2       Al4             3.61761(6)  .      1_555  N
  Ca2       Al4             3.56438(6)  .     -1_665  N
  Ca2       Al5             3.58427(6)  .      1_455  N
  Ca2       Al5             3.43406(6)  .     -1_665  N
  Ca2       Al6             3.07968(6)  .      1_455  N
  Ca2       Al6             3.45221(6)  .     -1_665  N
  Ca2       O1              2.60181(4)  .      1_555  N
  Ca2       O2              2.33516(5)  .      1_555  N
  Ca2       O4              2.72605(4)  .      1_555  N
  Ca2       O5              2.33743(4)  .      1_555  N
  Ca2       O7              2.33327(5)  .      1_555  N
  Ca2       O10             2.29355(4)  .     -1_665  N
  Ca3       Ca3            4.05155(10)  .      2_645  N
  Ca3       Ca3            4.05155(10)  .      2_655  N
  Ca3       Al1             3.19468(6)  .      1_555  N
  Ca3       Al2             3.21141(6)  .      1_555  N
  Ca3       Al3             3.74007(6)  .      1_555  N
  Ca3       Al3             3.41221(6)  .      2_645  N
  Ca3       Al4             3.72480(6)  .      1_555  N
  Ca3       Al4             3.29987(6)  .      2_655  N
  Ca3       Al5             3.32992(6)  .      1_555  N
  Ca3       Al6             3.32985(6)  .      1_555  N
  Ca3       O2              3.17539(7)  .      1_655  N
  Ca3       O7              2.80562(7)  .      1_555  N
  Ca3       O8              2.90357(5)  .      1_555  N
  Ca3       O8              2.39316(4)  .      2_655  N
  Ca3       O9              3.09177(7)  .      2_655  N
  Ca3       O11             2.35331(4)  .      1_555  N
  Ca3       O11             3.04042(5)  .      2_645  N
  Ca3       O12             2.89274(5)  .      1_555  N
  Ca3       O12             2.40281(4)  .      2_655  N
  Al1       Ca1             3.65068(6)  .      1_555  N
  Al1       Ca1             3.42157(6)  .      2_555  N
  Al1       Ca2             3.10687(6)  .      1_555  N
  Al1       Ca3             3.19468(6)  .      1_555  N
  Al1       Al2             3.12922(7)  .      2_545  N
  Al1       Al4             3.03863(6)  .      1_555  N
  Al1       Al5             2.96519(6)  .      2_645  N
  Al1       O3              1.74585(4)  .      2_545  N
  Al1       O4              1.75951(4)  .      1_555  N
  Al1       O7            1.766400(30)  .      1_555  N
  Al1       O8            1.733190(30)  .      1_555  N
  Al2       Ca1             3.67431(6)  .      1_565  N
  Al2       Ca1             3.40420(6)  .      2_555  N
  Al2       Ca2             3.46395(6)  .      1_555  N
  Al2       Ca3             3.21141(6)  .      1_555  N
  Al2       Al1             3.12922(7)  .      2_555  N
  Al2       Al3             2.95221(6)  .      1_555  N
  Al2       Al6             3.05816(6)  .      2_655  N
  Al2       O4              1.73855(4)  .      2_555  N
  Al2       O6            1.745420(30)  .      1_555  N
  Al2       O7              1.75813(4)  .      1_555  N
  Al2       O12             1.74990(4)  .      2_655  N
  Al3       Ca1             3.54770(7)  .      1_565  N
  Al3       Ca1             3.11853(6)  .     -1_665  N
  Al3       Ca2             3.51304(6)  .     -1_665  N
  Al3       Ca3             3.74007(6)  .      1_555  N
  Al3       Ca3             3.41221(6)  .      2_655  N
  Al3       Al2             2.95221(6)  .      1_555  N
  Al3       Al4             3.16204(7)  .      1_565  N
  Al3       Al4             3.05410(7)  .     -1_665  N
  Al3       Al5             3.04474(7)  .      1_555  N
  Al3       O5            1.777960(30)  .     -1_665  N
  Al3       O6              1.76428(4)  .      1_555  N
  Al3       O9            1.762190(30)  .      1_565  N
  Al3       O11           1.755410(30)  .      1_555  N
  Al4       Ca1             3.58097(7)  .      1_555  N
  Al4       Ca1             3.54662(6)  .     -1_655  N
  Al4       Ca2             3.61761(6)  .      1_555  N
  Al4       Ca2             3.56438(6)  .     -1_665  N
  Al4       Ca3             3.72480(6)  .      1_555  N
  Al4       Ca3             3.29987(6)  .      2_645  N
  Al4       Al1             3.03863(6)  .      1_555  N
  Al4       Al3             3.16204(7)  .      1_545  N
  Al4       Al3             3.05410(7)  .     -1_665  N
  Al4       Al6             2.99888(6)  .      1_555  N
  Al4       O5              1.76727(4)  .      1_555  N
  Al4       O8              1.76075(4)  .      1_555  N
  Al4       O9            1.727530(30)  .      1_555  N
  Al4       O10           1.739350(30)  .      1_555  N
  Al5       Ca1             3.62354(6)  .      1_665  N
  Al5       Ca1             3.68186(6)  .     -1_665  N
  Al5       Ca2             3.58427(6)  .      1_655  N
  Al5       Ca2             3.43406(6)  .     -1_665  N
  Al5       Ca3             3.32992(6)  .      1_555  N
  Al5       Al1             2.96519(6)  .      2_655  N
  Al5       Al3             3.04474(7)  .      1_555  N
  Al5       Al6             3.18487(8)  .      1_555  N
  Al5       Al6             3.04290(6)  .     -1_765  N
  Al5       O1              1.76702(4)  .     -1_665  N
  Al5       O2            1.756220(30)  .      1_655  N
  Al5       O3            1.738350(30)  .      1_655  N
  Al5       O11             1.75184(4)  .      1_555  N
  Al6       Ca1             3.55499(6)  .      1_655  N
  Al6       Ca2             3.07968(6)  .      1_655  N
  Al6       Ca2             3.45221(6)  .     -1_665  N
  Al6       Ca3             3.32985(6)  .      1_555  N
  Al6       Al2             3.05816(6)  .      2_645  N
  Al6       Al4             2.99888(6)  .      1_555  N
  Al6       Al5             3.18487(8)  .      1_555  N
  Al6       Al5             3.04290(6)  .     -1_765  N
  Al6       O1            1.763670(30)  .      1_655  N
  Al6       O2              1.75592(4)  .      1_655  N
  Al6       O10             1.74697(4)  .      1_555  N
  Al6       O12           1.758270(30)  .      1_555  N
  O1        Ca1             2.39975(4)  .      1_555  N
  O1        Ca2             2.60181(4)  .      1_555  N
  O1        Al5             1.76702(4)  .     -1_665  N
  O1        Al6           1.763670(30)  .      1_455  N
  O2        Ca2             2.33516(5)  .      1_555  N
  O2        Ca3             3.17539(7)  .      1_455  N
  O2        Al5           1.756220(30)  .      1_455  N
  O2        Al6             1.75592(4)  .      1_455  N
  O3        Ca1             2.31005(4)  .      1_565  N
  O3        Al1             1.74585(4)  .      2_555  N
  O3        Al5           1.738350(30)  .      1_455  N
  O4        Ca1             2.44583(4)  .      1_555  N
  O4        Ca2             2.72605(4)  .      1_555  N
  O4        Al1             1.75951(4)  .      1_555  N
  O4        Al2             1.73855(4)  .      2_545  N
  O5        Ca1             2.68015(4)  .      1_555  N
  O5        Ca2             2.33743(4)  .      1_555  N
  O5        Al3           1.777960(30)  .     -1_665  N
  O5        Al4             1.76727(4)  .      1_555  N
  O6        Ca1             2.35094(4)  .      1_565  N
  O6        Al2           1.745420(30)  .      1_555  N
  O6        Al3             1.76428(4)  .      1_555  N
  O7        Ca2             2.33327(5)  .      1_555  N
  O7        Ca3             2.80562(7)  .      1_555  N
  O7        Al1           1.766400(30)  .      1_555  N
  O7        Al2             1.75813(4)  .      1_555  N
  O8        Ca3             2.90357(5)  .      1_555  N
  O8        Ca3             2.39317(4)  .      2_645  N
  O8        Al1           1.733190(30)  .      1_555  N
  O8        Al4             1.76075(4)  .      1_555  N
  O9        Ca1             2.35784(5)  .     -1_655  N
  O9        Ca3             3.09177(7)  .      2_645  N
  O9        Al3           1.762190(30)  .      1_545  N
  O9        Al4           1.727530(30)  .      1_555  N
  O10       Ca2             2.29355(4)  .     -1_665  N
  O10       Al4           1.739350(30)  .      1_555  N
  O10       Al6             1.74697(4)  .      1_555  N
  O11       Ca3             2.35331(4)  .      1_555  N
  O11       Ca3             3.04042(5)  .      2_655  N
  O11       Al3           1.755410(30)  .      1_555  N
  O11       Al5             1.75184(4)  .      1_555  N
  O12       Ca3             2.89274(5)  .      1_555  N
  O12       Ca3             2.40281(4)  .      2_645  N
  O12       Al2             1.74990(4)  .      2_645  N
  O12       Al6           1.758270(30)  .      1_555  N

loop_
      _geom_angle_atom_site_label_1
      _geom_angle_atom_site_label_2
      _geom_angle_atom_site_label_3
      _geom_angle
      _geom_angle_site_symmetry_1
      _geom_angle_site_symmetry_2
      _geom_angle_site_symmetry_3
      _geom_angle_publ_flag
  Ca2       Ca1       Al3             63.2114(4)      1_555  .     -1_665  N
  Ca2       Ca1       O1             47.1584(10)      1_555  .      1_555  N
  Ca2       Ca1       O3             132.7400(7)      1_555  .      1_545  N
  Ca2       Ca1       O4             50.0670(11)      1_555  .      1_555  N
  Ca2       Ca1       O5              41.2032(8)      1_555  .      1_555  N
  Ca2       Ca1       O6            126.5234(10)      1_555  .      1_545  N
  Ca2       Ca1       O9              95.9196(5)      1_555  .     -1_655  N
  Al3       Ca1       O1             71.1586(14)     -1_665  .      1_555  N
  Al3       Ca1       O3             148.3465(7)     -1_665  .      1_545  N
  Al3       Ca1       O4            108.8411(15)     -1_665  .      1_555  N
  Al3       Ca1       O5              34.6752(7)     -1_665  .      1_555  N
  Al3       Ca1       O6             99.9668(15)     -1_665  .      1_545  N
  Al3       Ca1       O9             34.0870(10)     -1_665  .     -1_655  N
  O1        Ca1       O3            100.0181(16)      1_555  .      1_545  N
  O1        Ca1       O4             80.0693(17)      1_555  .      1_555  N
  O1        Ca1       O5             75.7274(17)      1_555  .      1_555  N
  O1        Ca1       O6           170.59760(20)      1_555  .      1_545  N
  O1        Ca1       O9             85.7885(14)      1_555  .     -1_655  N
  O3        Ca1       O4             98.9984(16)      1_545  .      1_555  N
  O3        Ca1       O5                173.9022      1_545  .      1_555  N
  O3        Ca1       O6             89.1922(17)      1_545  .      1_545  N
  O3        Ca1       O9            117.3119(13)      1_545  .     -1_655  N
  O4        Ca1       O5             76.0958(16)      1_555  .      1_555  N
  O4        Ca1       O6            100.4867(16)      1_555  .      1_545  N
  O4        Ca1       O9             142.8364(6)      1_555  .     -1_655  N
  O5        Ca1       O6             95.2312(17)      1_555  .      1_545  N
  O5        Ca1       O9             67.1295(13)      1_555  .     -1_655  N
  O6        Ca1       O9             88.3104(15)      1_545  .     -1_655  N
  Ca1       Ca2       Al1             66.1477(6)      1_555  .      1_555  N
  Ca1       Ca2       Al6             64.4181(5)      1_555  .      1_455  N
  Ca1       Ca2       O1              42.5546(9)      1_555  .      1_555  N
  Ca1       Ca2       O2              97.0882(6)      1_555  .      1_555  N
  Ca1       Ca2       O4              43.4699(8)      1_555  .      1_555  N
  Ca1       Ca2       O5             49.0530(11)      1_555  .      1_555  N
  Ca1       Ca2       O7              99.7593(4)      1_555  .      1_555  N
  Ca1       Ca2       O10            131.9292(8)      1_555  .     -1_665  N
  Al1       Ca2       Al6           100.4914(16)      1_555  .      1_455  N
  Al1       Ca2       O1            103.8274(16)      1_555  .      1_555  N
  Al1       Ca2       O2            105.8451(16)      1_555  .      1_555  N
  Al1       Ca2       O4              34.3307(7)      1_555  .      1_555  N
  Al1       Ca2       O5             72.1034(13)      1_555  .      1_555  N
  Al1       Ca2       O7             34.3029(10)      1_555  .      1_555  N
  Al1       Ca2       O10            155.6799(5)      1_555  .     -1_665  N
  Al6       Ca2       O1              34.9001(6)      1_455  .      1_555  N
  Al6       Ca2       O2             34.4953(10)      1_455  .      1_555  N
  Al6       Ca2       O4             67.3754(14)      1_455  .      1_555  N
  Al6       Ca2       O5            110.3763(16)      1_455  .      1_555  N
  Al6       Ca2       O7            123.5399(14)      1_455  .      1_555  N
  Al6       Ca2       O10           102.5935(15)      1_455  .     -1_665  N
  O1        Ca2       O2             67.9536(13)      1_555  .      1_555  N
  O1        Ca2       O4             71.5714(16)      1_555  .      1_555  N
  O1        Ca2       O5             78.3205(17)      1_555  .      1_555  N
  O1        Ca2       O7             137.6853(7)      1_555  .      1_555  N
  O1        Ca2       O10            99.4711(17)      1_555  .     -1_665  N
  O2        Ca2       O4             83.0344(14)      1_555  .      1_555  N
  O2        Ca2       O5             144.8178(6)      1_555  .      1_555  N
  O2        Ca2       O7            109.4775(16)      1_555  .      1_555  N
  O2        Ca2       O10            89.2246(15)      1_555  .     -1_665  N
  O4        Ca2       O5             76.9386(17)      1_555  .      1_555  N
  O4        Ca2       O7             66.2855(13)      1_555  .      1_555  N
  O4        Ca2       O10          169.86349(30)      1_555  .     -1_665  N
  O5        Ca2       O7             88.5777(13)      1_555  .      1_555  N
  O5        Ca2       O10           106.3962(16)      1_555  .     -1_665  N
  O7        Ca2       O10           122.8424(12)      1_555  .     -1_665  N
  Al1       Ca3       Al2            60.3328(16)      1_555  .      1_555  N
  Al1       Ca3       Al4           127.1262(13)      1_555  .      2_655  N
  Al1       Ca3       Al5           131.2042(12)      1_555  .      1_555  N
  Al1       Ca3       Al6           100.4091(16)      1_555  .      1_555  N
  Al1       Ca3       O7              33.4479(8)      1_555  .      1_555  N
  Al1       Ca3       O8             155.5430(6)      1_555  .      2_655  N
  Al1       Ca3       O11           110.3471(15)      1_555  .      1_555  N
  Al1       Ca3       O12            83.3434(17)      1_555  .      2_655  N
  Al2       Ca3       Al4            99.0902(16)      1_555  .      2_655  N
  Al2       Ca3       Al5            99.1290(16)      1_555  .      1_555  N
  Al2       Ca3       Al6           129.9078(13)      1_555  .      1_555  N
  Al2       Ca3       O7              33.1120(8)      1_555  .      1_555  N
  Al2       Ca3       O8            104.5683(17)      1_555  .      2_655  N
  Al2       Ca3       O11            69.1034(15)      1_555  .      1_555  N
  Al2       Ca3       O12             32.4407(7)      1_555  .      2_655  N
  Al4       Ca3       Al5            97.9880(15)      2_655  .      1_555  N
  Al4       Ca3       Al6           125.4478(13)      2_655  .      1_555  N
  Al4       Ca3       O7            128.5710(12)      2_655  .      1_555  N
  Al4       Ca3       O8              31.1560(7)      2_655  .      2_655  N
  Al4       Ca3       O11           104.3822(16)      2_655  .      1_555  N
  Al4       Ca3       O12            66.6833(14)      2_655  .      2_655  N
  Al5       Ca3       Al6            57.1391(16)      1_555  .      1_555  N
  Al5       Ca3       O7            105.6695(15)      1_555  .      1_555  N
  Al5       Ca3       O8             66.8629(14)      1_555  .      2_655  N
  Al5       Ca3       O11             30.1127(7)      1_555  .      1_555  N
  Al5       Ca3       O12           101.4949(17)      1_555  .      2_655  N
  Al6       Ca3       O7            105.6565(15)      1_555  .      1_555  N
  Al6       Ca3       O8            103.8858(15)      1_555  .      2_655  N
  Al6       Ca3       O11            77.7833(16)      1_555  .      1_555  N
  Al6       Ca3       O12            154.5611(4)      1_555  .      2_655  N
  O7        Ca3       O8             137.3513(9)      1_555  .      2_655  N
  O7        Ca3       O11            79.0993(13)      1_555  .      1_555  N
  O7        Ca3       O12            64.2234(11)      1_555  .      2_655  N
  O8        Ca3       O11            77.8837(16)      2_655  .      1_555  N
  O8        Ca3       O12            75.9479(17)      2_655  .      2_655  N
  O11       Ca3       O12            77.3499(17)      1_555  .      2_655  N
  Ca2       Al1       Ca3           102.3435(16)      1_555  .      1_555  N
  Ca2       Al1       O3            141.9450(10)      1_555  .      2_545  N
  Ca2       Al1       O4             60.8999(14)      1_555  .      1_555  N
  Ca2       Al1       O7              48.1101(4)      1_555  .      1_555  N
  Ca2       Al1       O8            101.9054(16)      1_555  .      1_555  N
  Ca3       Al1       O3             77.4888(16)      1_555  .      2_545  N
  Ca3       Al1       O4             163.1027(4)      1_555  .      1_555  N
  Ca3       Al1       O7             61.0987(11)      1_555  .      1_555  N
  Ca3       Al1       O8             64.4325(16)      1_555  .      1_555  N
  O3        Al1       O4            116.6172(16)      2_545  .      1_555  N
  O3        Al1       O7            105.1492(10)      2_545  .      1_555  N
  O3        Al1       O8            111.5646(16)      2_545  .      1_555  N
  O4        Al1       O7            104.3753(11)      1_555  .      1_555  N
  O4        Al1       O8            114.5016(15)      1_555  .      1_555  N
  O7        Al1       O8            102.8489(13)      1_555  .      1_555  N
  Ca3       Al2       O4            136.9352(10)      1_555  .      2_555  N
  Ca3       Al2       O6            107.3993(16)      1_555  .      1_555  N
  Ca3       Al2       O7             60.6624(10)      1_555  .      1_555  N
  Ca3       Al2       O12            47.4403(11)      1_555  .      2_655  N
  O4        Al2       O6            115.3769(13)      2_555  .      1_555  N
  O4        Al2       O7             111.0880(6)      2_555  .      1_555  N
  O4        Al2       O12           107.7992(17)      2_555  .      2_655  N
  O6        Al2       O7            104.0063(15)      1_555  .      1_555  N
  O6        Al2       O12           112.7640(13)      1_555  .      2_655  N
  O7        Al2       O12            105.3485(6)      1_555  .      2_655  N
  Ca1       Al3       O5             59.0495(13)     -1_665  .     -1_665  N
  Ca1       Al3       O6            141.5160(10)     -1_665  .      1_555  N
  Ca1       Al3       O9              48.5810(4)     -1_665  .      1_565  N
  Ca1       Al3       O11           103.0679(16)     -1_665  .      1_555  N
  O5        Al3       O6            113.1480(16)     -1_665  .      1_555  N
  O5        Al3       O9            104.4543(12)     -1_665  .      1_565  N
  O5        Al3       O11           111.6330(15)     -1_665  .      1_555  N
  O6        Al3       O9            109.8478(10)      1_555  .      1_565  N
  O6        Al3       O11           113.8302(14)      1_555  .      1_555  N
  O9        Al3       O11           102.9840(13)      1_565  .      1_555  N
  Ca3       Al4       O5            142.1398(10)      2_645  .      1_555  N
  Ca3       Al4       O8             44.6838(10)      2_645  .      1_555  N
  Ca3       Al4       O9             67.7641(11)      2_645  .      1_555  N
  Ca3       Al4       O10           104.5350(15)      2_645  .      1_555  N
  O5        Al4       O8            108.6616(17)      1_555  .      1_555  N
  O5        Al4       O9             110.9161(6)      1_555  .      1_555  N
  O5        Al4       O10           111.6728(13)      1_555  .      1_555  N
  O8        Al4       O9             107.7587(7)      1_555  .      1_555  N
  O8        Al4       O10           112.0212(13)      1_555  .      1_555  N
  O9        Al4       O10           105.7341(16)      1_555  .      1_555  N
  Ca3       Al5       O1            137.9684(10)      1_555  .     -1_665  N
  Ca3       Al5       O2             69.5342(12)      1_555  .      1_655  N
  Ca3       Al5       O3            104.6649(15)      1_555  .      1_655  N
  Ca3       Al5       O11            42.3731(10)      1_555  .      1_555  N
  O1        Al5       O2             108.7603(7)     -1_665  .      1_655  N
  O1        Al5       O3            115.8043(13)     -1_665  .      1_655  N
  O1        Al5       O11           108.0487(18)     -1_665  .      1_555  N
  O2        Al5       O3            104.3349(17)      1_655  .      1_655  N
  O2        Al5       O11            107.9215(8)      1_655  .      1_555  N
  O3        Al5       O11           111.6488(13)      1_655  .      1_555  N
  Ca2       Al6       Ca3           113.1081(15)      1_655  .      1_555  N
  Ca2       Al6       O1             57.5698(14)      1_655  .      1_655  N
  Ca2       Al6       O2              48.8651(4)      1_655  .      1_655  N
  Ca2       Al6       O10           140.6202(10)      1_655  .      1_555  N
  Ca2       Al6       O12           109.0701(16)      1_655  .      1_555  N
  Ca3       Al6       O1           168.93590(30)      1_555  .      1_655  N
  Ca3       Al6       O2             69.5381(12)      1_555  .      1_655  N
  Ca3       Al6       O10            75.6183(16)      1_555  .      1_555  N
  Ca3       Al6       O12            60.2446(14)      1_555  .      1_555  N
  O1        Al6       O2            103.7059(12)      1_655  .      1_655  N
  O1        Al6       O10           115.2817(15)      1_655  .      1_555  N
  O1        Al6       O12           115.1951(15)      1_655  .      1_555  N
  O2        Al6       O10            108.6443(9)      1_655  .      1_555  N
  O2        Al6       O12           105.0675(11)      1_655  .      1_555  N
  O10       Al6       O12           108.1915(16)      1_555  .      1_555  N
  Ca1       O1        Ca2            90.2870(19)      1_555  .      1_555  N
  Ca1       O1        Al5           123.4520(11)      1_555  .     -1_665  N
  Ca1       O1        Al6           116.4370(13)      1_555  .      1_455  N
  Ca2       O1        Al5           101.9315(13)      1_555  .     -1_665  N
  Ca2       O1        Al6            87.5301(15)      1_555  .      1_455  N
  Al5       O1        Al6           119.0483(14)     -1_665  .      1_455  N
  Ca2       O2        Al5            121.6974(5)      1_555  .      1_455  N
  Ca2       O2        Al6            96.6396(11)      1_555  .      1_455  N
  Al5       O2        Al6           130.1381(15)      1_455  .      1_455  N
  Ca1       O3        Al1           114.3276(14)      1_565  .      2_555  N
  Ca1       O3        Al5           126.4522(12)      1_565  .      1_455  N
  Al1       O3        Al5           116.6494(13)      2_555  .      1_455  N
  Ca1       O4        Ca2            86.4631(18)      1_555  .      1_555  N
  Ca1       O4        Al1           119.5860(13)      1_555  .      1_555  N
  Ca1       O4        Al2           107.6885(12)      1_555  .      2_545  N
  Ca2       O4        Al1            84.7693(15)      1_555  .      1_555  N
  Ca2       O4        Al2           122.5690(11)      1_555  .      2_545  N
  Al1       O4        Al2           126.9032(13)      1_555  .      2_545  N
  Ca1       O5        Ca2            89.7438(19)      1_555  .      1_555  N
  Ca1       O5        Al3            86.2752(15)      1_555  .     -1_665  N
  Ca1       O5        Al4           105.4078(13)      1_555  .      1_555  N
  Ca2       O5        Al3           116.5620(13)      1_555  .     -1_665  N
  Ca2       O5        Al4           123.0050(10)      1_555  .      1_555  N
  Al3       O5        Al4           118.9629(14)     -1_665  .      1_555  N
  Ca1       O6        Al2           126.8965(13)      1_565  .      1_555  N
  Ca1       O6        Al3           118.4088(12)      1_565  .      1_555  N
  Al2       O6        Al3           114.5237(13)      1_555  .      1_555  N
  Ca2       O7        Ca3           145.4737(10)      1_555  .      1_555  N
  Ca2       O7        Al1            97.5870(10)      1_555  .      1_555  N
  Ca2       O7        Al2            114.9725(5)      1_555  .      1_555  N
  Ca3       O7        Al1             85.4534(8)      1_555  .      1_555  N
  Ca3       O7        Al2             86.2256(7)      1_555  .      1_555  N
  Al1       O7        Al2           131.9484(14)      1_555  .      1_555  N
  Ca3       O8        Al1           133.2759(10)      2_645  .      1_555  N
  Ca3       O8        Al4           104.1601(13)      2_645  .      1_555  N
  Al1       O8        Al4           120.8422(14)      1_555  .      1_555  N
  Ca1       O9        Al3            97.3320(11)     -1_655  .      1_545  N
  Ca1       O9        Al4            119.6878(5)     -1_655  .      1_555  N
  Al3       O9        Al4           129.9411(15)      1_545  .      1_555  N
  Ca2       O10       Al4           123.6329(14)     -1_665  .      1_555  N
  Ca2       O10       Al6           116.7386(13)     -1_665  .      1_555  N
  Al4       O10       Al6           118.6749(12)      1_555  .      1_555  N
  Ca3       O11       Al3           130.5259(11)      1_555  .      1_555  N
  Ca3       O11       Al5           107.5142(13)      1_555  .      1_555  N
  Al3       O11       Al5           120.4836(13)      1_555  .      1_555  N
  Ca3       O12       Al2           100.1189(12)      2_645  .      2_645  N
  Ca3       O12       Al6           132.3961(10)      2_645  .      1_555  N
  Al2       O12       Al6           121.3194(14)      2_645  .      1_555  N

#--eof--eof--eof--eof--eof--eof--eof--eof--eof--eof--eof--eof--eof--eof--eof--#

#===END
data_C12A7_eV_RT

_pd_block_id
  2006-04-03T12:06|C12A7_eV_RT|Aranda_M._A._G.|Overall

_audit_creation_method  "from EXP file using GSAS2CIF"
_audit_creation_date                   2006-04-03T12:06
_audit_author_name                     "Aranda M. A. G."
_audit_update_record
; 2006-04-03T12:06  Initial CIF as created by GSAS2CIF
;

#=============================================================================
# this information describes the project, paper etc. for the CIF             #
# Acta Cryst. Section C papers and editorial correspondence is generated     #
# from the information in this section                                       #
#                                                                            #
#   (from)   CIF submission form for Rietveld refinements (Acta Cryst. C)    #
#                                                 Version 14 December 1998   #
#=============================================================================
# 1. SUBMISSION DETAILS

_publ_contact_author_name            ?   # M. A. G. Aranda
_publ_contact_author_address             # University of Malaga
; ?
;
_publ_contact_author_email           ?
_publ_contact_author_fax             ?
_publ_contact_author_phone           ?

_publ_contact_letter
; ?
;

_publ_requested_journal              ?
_publ_requested_coeditor_name        ?
_publ_requested_category             ?   # Acta C: one of CI/CM/CO/FI/FM/FO

#==============================================================================

# 2. PROCESSING SUMMARY (IUCr Office Use Only)

_journal_data_validation_number      ?

_journal_date_recd_electronic        ?
_journal_date_to_coeditor            ?
_journal_date_from_coeditor          ?
_journal_date_accepted               ?
_journal_date_printers_first         ?
_journal_date_printers_final         ?
_journal_date_proofs_out             ?
_journal_date_proofs_in              ?
_journal_coeditor_name               ?
_journal_coeditor_code               ?
_journal_coeditor_notes
; ?
;
_journal_techeditor_code             ?
_journal_techeditor_notes
; ?
;
_journal_coden_ASTM                  ?
_journal_name_full                   ?
_journal_year                        ?
_journal_volume                      ?
_journal_issue                       ?
_journal_page_first                  ?
_journal_page_last                   ?
_journal_paper_category              ?
_journal_suppl_publ_number           ?
_journal_suppl_publ_pages            ?

#==============================================================================

# 3. TITLE AND AUTHOR LIST

_publ_section_title
; ?
;
_publ_section_title_footnote
; ?
;

# The loop structure below should contain the names and addresses of all
# authors, in the required order of publication. Repeat as necessary.

loop_
	_publ_author_name
        _publ_author_footnote
	_publ_author_address
 ?                                   #<--'Last name, first name'
; ?
;
; ?
;

#==============================================================================

# 4. TEXT

_publ_section_synopsis
;  ?
;
_publ_section_abstract
; ?
;
_publ_section_comment
; ?
;
_publ_section_exptl_prep      # Details of the preparation of the sample(s)
                              # should be given here.
; ?
;
_publ_section_exptl_refinement
; ?
;
_publ_section_references
; ?
;
_publ_section_figure_captions
; ?
;
_publ_section_acknowledgements
; ?
;

#=============================================================================
# 5. OVERALL REFINEMENT & COMPUTING DETAILS

_refine_special_details
; ?
;
_pd_proc_ls_special_details
; ?
;

# The following items are used to identify the programs used.
_computing_molecular_graphics     ?
_computing_publication_material   ?

_refine_ls_weighting_scheme       ?
_refine_ls_weighting_details      ?
_refine_ls_hydrogen_treatment     ?
_refine_ls_extinction_method      ?
_refine_ls_extinction_coef        ?
_refine_ls_number_constraints     ?

_refine_ls_restrained_S_all       ?
_refine_ls_restrained_S_obs       ?

#==============================================================================
# 6. SAMPLE PREPARATION DATA

# (In the unusual case where multiple samples are used in a single
#  Rietveld study, this information should be moved into the phase
#  blocks)

# The following three fields describe the preparation of the material.
# The cooling rate is in K/min.  The pressure at which the sample was
# prepared is in kPa.  The temperature of preparation is in K.

_pd_prep_cool_rate                ?
_pd_prep_pressure                 ?
_pd_prep_temperature              ?

_pd_char_colour                   ?       # use ICDD colour descriptions
data_C12A7_eV_RT_overall

_refine_ls_shift/su_max                0.04
_refine_ls_shift/su_mean               0.00
_computing_structure_refinement        GSAS
_refine_ls_number_parameters           97
_refine_ls_goodness_of_fit_all         0.78
_refine_ls_number_restraints           0

# Overall powder R-factors

_pd_proc_ls_prof_R_factor              0.0515
_pd_proc_ls_prof_wR_factor             0.0450
_refine_ls_matrix_type                 full

# pointers to the phase blocks
loop_   _pd_phase_block_id
      2006-04-03T12:06|C12A7_eV_RT_phase1|Aranda_M._A._G.||
      2006-04-03T12:06|C12A7_eV_RT_phase2|Aranda_M._A._G.||
      2006-04-03T12:06|C12A7_eV_RT_phase3|Aranda_M._A._G.||
# pointers to the diffraction patterns
loop_   _pd_block_diffractogram_id
      2006-04-03T12:06|C12A7_eV_RT_H_01|Aranda_M._A._G.|ID31
      2006-04-03T12:06|C12A7_eV_RT_H_02|Aranda_M._A._G.|HRPT

# Information for phase 1
data_C12A7_eV_RT_phase_1

_pd_block_id
  2006-04-03T12:06|C12A7_eV_RT_phase1|Aranda_M._A._G.||

# Histograms for phase 1
loop_   _pd_block_diffractogram_id
  2006-04-03T12:06|C12A7_eV_RT_H_01|Aranda_M._A._G.|ID31
  2006-04-03T12:06|C12A7_eV_RT_H_02|Aranda_M._A._G.|HRPT

#==============================================================================
# 7. CHEMICAL, STRUCTURAL AND CRYSTAL DATA

_pd_char_particle_morphology      ?

_chemical_name_systematic
; ?
;
_chemical_name_common             ?
_chemical_formula_moiety          ?
_chemical_formula_structural      ?
_chemical_formula_analytical      ?
_chemical_melting_point           ?
_chemical_compound_source         ?       # for minerals and
                                          # natural products
_symmetry_space_group_name_Hall   ?

_exptl_crystal_F_000               ?
_exptl_crystal_density_diffrn      ?
_exptl_crystal_density_meas        ?
_exptl_crystal_density_method      ?

_cell_measurement_temperature     ?

_cell_special_details
; ?
;

_geom_special_details             ?

# The following item identifies the program(s) used (if appropriate).
_computing_structure_solution     ?

#==============================================================================

# 8. Phase information from GSAS

_pd_phase_name                         C12A7-Verde
_cell_length_a                         11.992147(4)
_cell_length_b                         11.992147
_cell_length_c                         11.992147
_cell_angle_alpha                      90.0
_cell_angle_beta                       90.0
_cell_angle_gamma                      90.0
_cell_volume                           1724.6100(7)
_symmetry_cell_setting                 cubic
_symmetry_space_group_name_H-M         "I -4 3 d"
loop_ _symmetry_equiv_pos_site_id _symmetry_equiv_pos_as_xyz
       1 +x,+y,+z 
       2 +z,+x,+y 
       3 +y,+z,+x 
       4 +y+3/4,-x+1/4,-z+3/4 
       5 -z+3/4,+y+3/4,-x+1/4 
       6 -x+1/4,-z+3/4,+y+3/4 
       7 -x,-y+1/2,+z 
       8 -z+1/2,+x,-y 
       9 -y,-z+1/2,+x 
      10 +x,-y,-z+1/2 
      11 +z,-x,-y+1/2 
      12 -y+1/2,+z,-x 
      13 -y+1/4,+x+1/4,-z+3/4 
      14 -z+3/4,-y+1/4,+x+1/4 
      15 +x+1/4,-z+3/4,-y+1/4 
      16 +x+3/4,+z+3/4,+y+3/4 
      17 +y+3/4,+x+3/4,+z+3/4 
      18 +z+3/4,+y+3/4,+x+3/4 
      19 +y+1/2,-z+1/2,-x 
      20 -y+3/4,-x+1/4,+z+1/4 
      21 +z+1/4,-y+3/4,-x+1/4 
      22 -x+1/4,+z+1/4,-y+3/4 
      23 -x,+y+1/2,-z+1/2 
      24 -z+1/2,-x,+y+1/2 
     101 +x+1/2,+y+1/2,+z+1/2 
     102 +z+1/2,+x+1/2,+y+1/2 
     103 +y+1/2,+z+1/2,+x+1/2 
     104 +y+1/4,-x+3/4,-z+1/4 
     105 -z+1/4,+y+1/4,-x+3/4 
     106 -x+3/4,-z+1/4,+y+1/4 
     107 -x+1/2,-y,+z+1/2 
     108 -z,+x+1/2,-y+1/2 
     109 -y+1/2,-z,+x+1/2 
     110 +x+1/2,-y+1/2,-z 
     111 +z+1/2,-x+1/2,-y 
     112 -y,+z+1/2,-x+1/2 
     113 -y+3/4,+x+3/4,-z+1/4 
     114 -z+1/4,-y+3/4,+x+3/4 
     115 +x+3/4,-z+1/4,-y+3/4 
     116 +x+1/4,+z+1/4,+y+1/4 
     117 +y+1/4,+x+1/4,+z+1/4 
     118 +z+1/4,+y+1/4,+x+1/4 
     119 +y,-z,-x+1/2 
     120 -y+1/4,-x+3/4,+z+3/4 
     121 +z+3/4,-y+1/4,-x+3/4 
     122 -x+3/4,+z+3/4,-y+1/4 
     123 -x+1/2,+y,-z 
     124 -z,-x+1/2,+y 

# ATOMIC COORDINATES AND DISPLACEMENT PARAMETERS


loop_
      _atom_site_type_symbol
      _atom_site_label
      _atom_site_fract_x
      _atom_site_fract_y
      _atom_site_fract_z
      _atom_site_occupancy
      _atom_site_thermal_displace_type
      _atom_site_U_iso_or_equiv
      _atom_site_symmetry_multiplicity
Ca Ca1 0.89096(5)   0.0          0.75         0.8895(19) Uani   0.00634      24
Al Al1 1.01866(3)   0.01866(3)   1.01866(3)   1.0        Uani   0.0103       16
Al Al2 1.0         -0.25         0.625        1.0        Uani   0.00407      12
O  O2  0.93556(3)  -0.06444(3)   0.93556(3)   1.0        Uani   0.00985      16
O  O1  0.90035(4)  -0.19182(3)   0.71323(4)   1.0        Uani   0.01225      48
Ca Ca2 0.9500(5)    0.0          0.75         0.1105(19) Uiso   0.0215(13)   24
O  O3  0.6868(17)   0.1146(21)  -0.0037(26)   0.0223(8)  Uiso   0.03         48

loop_ 
 _atom_site_aniso_label
 _atom_site_aniso_U_11
 _atom_site_aniso_U_12
 _atom_site_aniso_U_13
 _atom_site_aniso_U_22
 _atom_site_aniso_U_23
 _atom_site_aniso_U_33
Ca1 0.00954(30)  0.0         0.0  0.00458(20)  0.00106(18)  0.00489(19)
Al1 0.0103(2) -0.0006(2) -0.0006(2)  0.0103(2) -0.0006(2) 0.0103(2)
Al2 0.00636(22)  0.0    0.0      0.00636(22)  0.0        -0.00052(34)
O2  0.0099(1) -0.0028(1) -0.0028(1)  0.0099(1) -0.0028(1)  0.0099(1)
O1  0.0129(2) -0.0008(2)  0.0080(2)  0.0116(2) -0.0037(1)  0.0122(2)

loop_ _atom_type_symbol
      _atom_type_number_in_cell
                   Ca 24.0        
                   Al 28.0        
                   O  65.071      
 
# If you change Z, be sure to change all 3 of the following
_chemical_formula_sum                  "Al7 Ca6.00 O16.27"
_chemical_formula_weight               689.62
_cell_formula_units_Z                  4

# MOLECULAR GEOMETRY

loop_
      _geom_bond_atom_site_label_1
      _geom_bond_atom_site_label_2
      _geom_bond_distance
      _geom_bond_site_symmetry_1
      _geom_bond_site_symmetry_2
      _geom_bond_publ_flag
  Ca1       Ca1             3.68180(6)  .      2_546  N
  Ca1       Ca1             3.68180(6)  .      3_645  N
  Ca1       Ca1            5.51218(29)  .      4_566  N
  Ca1       Ca1              5.7167(4)  .      5_646  N
  Ca1       Ca1             5.6132(12)  .      6_755  N
  Ca1       Ca1             3.68180(6)  .     11_565  N
  Ca1       Ca1            5.51218(29)  .     13_646  N
  Ca1       Ca1              5.7167(4)  .     14_655  N
  Ca1       Ca1            5.51218(29)  .     17_534  N
  Ca1       Ca1              5.7167(4)  .     18_444  N
  Ca1       Ca1            5.51218(29)  .    104_656  N
  Ca1       Ca1              5.7167(4)  .    105_656  N
  Ca1       Ca1             3.68180(6)  .    112_646  N
  Ca1       Al1              3.5743(6)  .      1_555  N
  Ca1       Al1              3.1461(6)  .      4_566  N
  Ca1       Al1              3.5743(6)  .     10_556  N
  Ca1       Al1              3.1460(6)  .     16_435  N
  Ca1       Al2            3.59792(22)  .      1_555  N
  Ca1       Al2              3.1895(6)  .      2_546  N
  Ca1       Al2            3.59792(22)  .     10_556  N
  Ca1       O2               2.4155(4)  .      1_555  N
  Ca1       O2               4.5699(7)  .      4_566  N
  Ca1       O2               2.4155(4)  .     10_556  N
  Ca1       O2               4.5699(7)  .     16_435  N
  Ca1       O1               2.3450(4)  .      1_555  N
  Ca1       O1               2.5412(7)  .      2_546  N
  Ca1       O1               4.0079(4)  .      3_645  N
  Ca1       O1               4.4850(5)  .      7_745  N
  Ca1       O1               4.7757(6)  .      9_655  N
  Ca1       O1               2.3450(4)  .     10_556  N
  Ca1       O1               2.5412(7)  .     11_565  N
  Ca1       O1               4.8506(6)  .     15_555  N
  Ca1       O1               4.9489(4)  .     20_565  N
  Ca1       O1               4.9283(4)  .     21_546  N
  Ca1       O1               4.4850(5)  .     23_756  N
  Ca1       O1               3.7163(5)  .    104_656  N
  Ca1       O1               4.4673(7)  .    105_656  N
  Ca1       O1               4.7757(6)  .    112_646  N
  Ca1       O1               4.9489(4)  .    113_536  N
  Ca1       O1               4.4673(7)  .    114_644  N
  Ca1       O1               4.8506(6)  .    116_546  N
  Ca1       O1               3.7163(5)  .    117_645  N
  Ca1       O1               4.9283(4)  .    118_555  N
  Ca1       O1               4.0079(4)  .    119_666  N
  Ca1       Ca2               0.708(6)  .      1_555  N
  Ca1       Ca2              3.4936(9)  .      2_546  N
  Ca1       Ca2               4.056(4)  .      3_645  N
  Ca1       Ca2               4.979(5)  .      4_566  N
  Ca1       Ca2               4.905(7)  .      6_755  N
  Ca1       Ca2              3.4936(9)  .     11_565  N
  Ca1       Ca2             5.7689(24)  .     13_646  N
  Ca1       Ca2               4.979(5)  .     17_534  N
  Ca1       Ca2              5.5973(5)  .     18_444  N
  Ca1       Ca2             5.7689(24)  .    104_656  N
  Ca1       Ca2              5.5973(5)  .    105_656  N
  Ca1       Ca2               4.056(4)  .    112_646  N
  Ca1       O3               4.075(28)  .      1_556  N
  Ca1       O3               2.787(25)  .      3_655  N
  Ca1       O3               3.220(25)  .      5_546  N
  Ca1       O3               4.075(28)  .     10_555  N
  Ca1       O3               3.028(24)  .     13_645  N
  Ca1       O3               3.220(25)  .     14_555  N
  Ca1       O3               4.444(21)  .     18_544  N
  Ca1       O3               3.466(30)  .    107_655  N
  Ca1       O3               2.787(25)  .    119_656  N
  Ca1       O3               3.028(24)  .    120_655  N
  Ca1       O3               4.444(21)  .    121_556  N
  Ca1       O3               3.466(30)  .    123_656  N
  Al1       Ca1              3.5743(6)  .      1_555  N
  Al1       Ca1              3.5742(6)  .      2_546  N
  Al1       Ca1              3.5742(6)  .      3_645  N
  Al1       Ca1              3.1461(6)  .     13_646  N
  Al1       Ca1              3.1461(6)  .     14_655  N
  Al1       Ca1              3.1460(6)  .     15_556  N
  Al1       Al2            3.27331(10)  .      8_646  N
  Al1       Al2            3.27330(10)  .      9_655  N
  Al1       Al2            3.27334(10)  .     10_556  N
  Al1       O2               1.7261(9)  .      1_555  N
  Al1       O2               3.4666(9)  .    116_546  N
  Al1       O1               3.7494(4)  .      8_646  N
  Al1       O1               3.7494(4)  .      9_655  N
  Al1       O1               3.7495(4)  .     10_556  N
  Al1       O1               1.7778(5)  .    116_546  N
  Al1       O1               1.7778(5)  .    117_645  N
  Al1       O1               1.7778(5)  .    118_555  N
  Al1       Ca2             3.3328(17)  .      1_555  N
  Al1       Ca2             3.3328(17)  .      2_546  N
  Al1       Ca2             3.3328(17)  .      3_645  N
  Al1       Ca2               4.670(5)  .      4_566  N
  Al1       Ca2               4.670(5)  .      5_647  N
  Al1       Ca2               4.670(5)  .      6_755  N
  Al1       Ca2               3.532(4)  .     13_646  N
  Al1       Ca2               3.532(4)  .     14_655  N
  Al1       Ca2               3.532(4)  .     15_556  N
  Al1       O3               3.608(30)  .     13_645  N
  Al1       O3               3.609(30)  .     14_555  N
  Al1       O3               3.608(30)  .     15_546  N
  Al1       O3               2.725(20)  .    119_656  N
  Al1       O3               3.593(29)  .    120_655  N
  Al1       O3               3.593(29)  .    121_556  N
  Al1       O3               3.593(29)  .    122_646  N
  Al1       O3               2.725(20)  .    123_656  N
  Al1       O3               2.725(20)  .    124_656  N
  Al2       Ca1            3.59792(22)  .      1_555  N
  Al2       Ca1              3.1895(6)  .      3_645  N
  Al2       Ca1              3.1895(6)  .      5_646  N
  Al2       Ca1            3.59792(22)  .      7_745  N
  Al2       Ca1            3.59792(22)  .     17_534  N
  Al2       Ca1            3.59792(22)  .    104_656  N
  Al2       Al1            3.27330(10)  .      6_755  N
  Al2       Al1            3.27334(10)  .     10_556  N
  Al2       Al1            3.27330(10)  .     16_435  N
  Al2       Al1            3.27334(10)  .     23_746  N
  Al2       O2               3.9171(4)  .      6_755  N
  Al2       O2               3.9171(4)  .     10_556  N
  Al2       O2               3.9171(4)  .     16_435  N
  Al2       O2               3.9171(4)  .     23_746  N
  Al2       O1               1.7419(4)  .      1_555  N
  Al2       O1               1.7419(4)  .      7_745  N
  Al2       O1               1.7419(4)  .    104_656  N
  Al2       O1               1.7419(4)  .    113_536  N
  Al2       Ca2             3.4051(11)  .      1_555  N
  Al2       Ca2               3.898(6)  .      3_645  N
  Al2       Ca2               3.898(6)  .      5_646  N
  Al2       Ca2               4.917(5)  .      6_755  N
  Al2       Ca2             3.4051(11)  .      7_745  N
  Al2       Ca2               4.917(5)  .     11_565  N
  Al2       Ca2               4.917(5)  .     16_435  N
  Al2       Ca2             3.4051(11)  .     17_534  N
  Al2       Ca2               4.917(5)  .    102_535  N
  Al2       Ca2             3.4051(11)  .    104_656  N
  Al2       O3               3.341(29)  .      3_655  N
  Al2       O3               3.168(25)  .      4_555  N
  Al2       O3               3.341(29)  .      5_546  N
  Al2       O3               3.341(29)  .      9_645  N
  Al2       O3               3.168(25)  .     13_645  N
  Al2       O3               3.341(29)  .     21_646  N
  Al2       O3               3.168(25)  .    101_545  N
  Al2       O3               3.168(25)  .    107_655  N
  O2        Ca1              2.4155(4)  .      1_555  N
  O2        Ca1              2.4155(4)  .      2_546  N
  O2        Ca1              2.4156(4)  .      3_645  N
  O2        Ca1              4.5699(7)  .     13_646  N
  O2        Ca1              4.5699(7)  .     14_655  N
  O2        Ca1              4.5699(7)  .     15_556  N
  O2        Al1              1.7261(9)  .      1_555  N
  O2        Al1              3.4666(9)  .     16_435  N
  O2        Al2              3.9171(4)  .      8_646  N
  O2        Al2              3.9171(4)  .      9_655  N
  O2        Al2              3.9171(4)  .     10_556  N
  O2        O1               3.1017(8)  .      1_555  N
  O2        O1               3.1016(8)  .      2_546  N
  O2        O1               3.1017(8)  .      3_645  N
  O2        O1               3.5786(4)  .      8_646  N
  O2        O1               3.5786(4)  .      9_655  N
  O2        O1               3.5786(4)  .     10_556  N
  O2        O1               2.9845(7)  .    116_546  N
  O2        O1               2.9845(7)  .    117_645  N
  O2        O1               2.9845(7)  .    118_555  N
  O2        Ca2              2.3620(5)  .      1_555  N
  O2        Ca2              2.3620(5)  .      2_546  N
  O2        Ca2              2.3620(5)  .      3_645  N
  O2        Ca2               4.965(6)  .      4_566  N
  O2        Ca2               4.965(6)  .      5_647  N
  O2        Ca2               4.965(6)  .      6_755  N
  O2        Ca2               4.987(4)  .     13_646  N
  O2        Ca2               4.987(4)  .     14_655  N
  O2        Ca2               4.988(4)  .     15_556  N
  O2        O3               3.747(23)  .      1_556  N
  O2        O3               3.747(23)  .      2_646  N
  O2        O3               3.747(23)  .      3_655  N
  O2        O3               3.241(28)  .     13_645  N
  O2        O3               3.241(28)  .     14_555  N
  O2        O3               3.241(28)  .     15_546  N
  O2        O3               2.726(24)  .    119_656  N
  O2        O3               3.638(25)  .    120_655  N
  O2        O3               3.638(25)  .    121_556  N
  O2        O3               3.638(25)  .    122_646  N
  O2        O3               2.726(24)  .    123_656  N
  O2        O3               2.726(24)  .    124_656  N
  O1        Ca1              2.3450(4)  .      1_555  N
  O1        Ca1              4.0079(4)  .      2_546  N
  O1        Ca1              2.5412(7)  .      3_645  N
  O1        Ca1              4.4673(7)  .      5_646  N
  O1        Ca1              4.4850(5)  .      7_745  N
  O1        Ca1              4.7757(6)  .     11_565  N
  O1        Ca1              4.8506(6)  .     16_435  N
  O1        Ca1              3.7163(5)  .     17_534  N
  O1        Ca1              4.9283(4)  .     18_444  N
  O1        Ca1              4.9489(4)  .    104_656  N
  O1        Al1              3.7495(4)  .     10_556  N
  O1        Al1              1.7778(5)  .     16_435  N
  O1        Al2              1.7419(4)  .      1_555  N
  O1        O2               3.1017(8)  .      1_555  N
  O1        O2               3.5786(4)  .     10_556  N
  O1        O2               2.9845(7)  .     16_435  N
  O1        O1               2.7484(7)  .      2_546  N
  O1        O1               2.7484(7)  .      3_645  N
  O1        O1               2.7675(9)  .      7_745  N
  O1        O1               2.8823(7)  .    104_656  N
  O1        O1               2.8823(7)  .    113_536  N
  O1        Ca2             2.4168(16)  .      1_555  N
  O1        Ca2             4.2393(26)  .      2_546  N
  O1        Ca2               3.159(6)  .      3_645  N
  O1        Ca2             4.1318(28)  .      7_745  N
  O1        Ca2               4.266(4)  .     11_565  N
  O1        Ca2               4.430(4)  .     16_435  N
  O1        Ca2             3.3870(25)  .     17_534  N
  O1        Ca2              4.8541(5)  .     18_444  N
  O1        Ca2              4.9122(4)  .    104_656  N
  O1        O3               3.434(28)  .      3_655  N
  O1        O3               3.008(21)  .      4_555  N
  O1        O3               2.605(24)  .      5_546  N
  O1        O3               3.670(31)  .      9_645  N
  O1        O3               3.705(27)  .     10_555  N
  O1        O3               3.250(25)  .     13_645  N
  O1        O3               3.855(23)  .     18_544  N
  O1        O3               2.952(30)  .    107_655  N
  O1        O3               3.931(30)  .    112_646  N
  O1        O3               3.679(28)  .    119_656  N
  Ca2       Ca1               0.708(6)  .      1_555  N
  Ca2       Ca1               4.056(4)  .      2_546  N
  Ca2       Ca1              3.4936(9)  .      3_645  N
  Ca2       Ca1             5.7689(24)  .      4_566  N
  Ca2       Ca1              5.5973(5)  .      5_646  N
  Ca2       Ca1               4.905(7)  .      6_755  N
  Ca2       Ca1               4.056(4)  .     11_565  N
  Ca2       Ca1               4.979(5)  .     13_646  N
  Ca2       Ca1              5.5973(5)  .     14_655  N
  Ca2       Ca1             5.7689(24)  .     17_534  N
  Ca2       Ca1               4.979(5)  .    104_656  N
  Ca2       Ca1              3.4936(9)  .    112_646  N
  Ca2       Al1             3.3328(17)  .      1_555  N
  Ca2       Al1               3.532(4)  .      4_566  N
  Ca2       Al1               4.670(5)  .      6_755  N
  Ca2       Al1             3.3328(17)  .     10_556  N
  Ca2       Al1               4.670(5)  .     13_646  N
  Ca2       Al1               3.532(4)  .     16_435  N
  Ca2       Al2             3.4051(11)  .      1_555  N
  Ca2       Al2               3.898(6)  .      2_546  N
  Ca2       Al2               4.917(5)  .      6_755  N
  Ca2       Al2               4.917(5)  .      9_655  N
  Ca2       Al2             3.4051(11)  .     10_556  N
  Ca2       O2               2.3620(5)  .      1_555  N
  Ca2       O2                4.987(4)  .      4_566  N
  Ca2       O2                4.965(6)  .      6_755  N
  Ca2       O2               2.3620(5)  .     10_556  N
  Ca2       O2                4.965(6)  .     13_646  N
  Ca2       O2                4.988(4)  .     16_435  N
  Ca2       O1              2.4168(16)  .      1_555  N
  Ca2       O1                3.159(6)  .      2_546  N
  Ca2       O1              4.2393(26)  .      3_645  N
  Ca2       O1              4.1318(28)  .      7_745  N
  Ca2       O1                4.266(4)  .      9_655  N
  Ca2       O1              2.4168(16)  .     10_556  N
  Ca2       O1                3.159(6)  .     11_565  N
  Ca2       O1                4.430(4)  .     15_555  N
  Ca2       O1               4.9122(4)  .     20_565  N
  Ca2       O1               4.8541(5)  .     21_546  N
  Ca2       O1              4.1318(28)  .     23_756  N
  Ca2       O1              3.3870(25)  .    104_656  N
  Ca2       O1                4.266(4)  .    112_646  N
  Ca2       O1               4.9122(4)  .    113_536  N
  Ca2       O1                4.430(4)  .    116_546  N
  Ca2       O1              3.3870(25)  .    117_645  N
  Ca2       O1               4.8541(5)  .    118_555  N
  Ca2       O1              4.2393(26)  .    119_666  N
  Ca2       Ca2             3.8860(30)  .      2_546  N
  Ca2       Ca2             3.8860(30)  .      3_645  N
  Ca2       Ca2             5.2615(15)  .      4_566  N
  Ca2       Ca2              4.197(13)  .      6_755  N
  Ca2       Ca2             3.8860(30)  .     11_565  N
  Ca2       Ca2             5.2615(15)  .     13_646  N
  Ca2       Ca2             5.2615(15)  .     17_534  N
  Ca2       Ca2             5.2615(15)  .    104_656  N
  Ca2       Ca2             3.8860(30)  .    112_646  N
  Ca2       O3               4.536(27)  .      1_556  N
  Ca2       O3               2.114(25)  .      3_655  N
  Ca2       O3               3.633(26)  .      5_546  N
  Ca2       O3               4.536(27)  .     10_555  N
  Ca2       O3               2.349(25)  .     13_645  N
  Ca2       O3               3.633(26)  .     14_555  N
  Ca2       O3               4.766(22)  .     18_544  N
  Ca2       O3               3.720(29)  .    107_655  N
  Ca2       O3               4.955(24)  .    108_645  N
  Ca2       O3               2.114(25)  .    119_656  N
  Ca2       O3               2.349(25)  .    120_655  N
  Ca2       O3               4.766(22)  .    121_556  N
  Ca2       O3               3.720(29)  .    123_656  N
  Ca2       O3               4.955(24)  .    124_656  N
  O3        Ca1              4.075(28)  .      1_554  N
  O3        Ca1              2.787(25)  .      2_545  N
  O3        Ca1              3.028(24)  .      4_565  N
  O3        Ca1              4.444(21)  .     14_654  N
  O3        Ca1              3.220(25)  .    105_655  N
  O3        Ca1              3.466(30)  .    107_654  N
  O3        Al1              3.608(30)  .      4_565  N
  O3        Al1              2.725(20)  .      8_645  N
  O3        Al1              3.593(29)  .     14_654  N
  O3        Al2              3.341(29)  .      2_545  N
  O3        Al2              3.168(25)  .      4_565  N
  O3        O2               3.747(23)  .      1_554  N
  O3        O2               3.241(28)  .      4_565  N
  O3        O2               2.726(24)  .      8_645  N
  O3        O2               3.638(25)  .     14_654  N
  O3        O1               3.434(28)  .      2_545  N
  O3        O1               3.250(25)  .      4_565  N
  O3        O1               3.679(28)  .      8_645  N
  O3        O1               3.705(27)  .     10_555  N
  O3        O1               3.670(31)  .     11_564  N
  O3        O1               3.008(21)  .     13_545  N
  O3        O1               3.931(30)  .     24_665  N
  O3        O1               2.605(24)  .    105_655  N
  O3        O1               2.952(30)  .    107_654  N
  O3        O1               3.855(23)  .    118_554  N
  O3        Ca2              4.536(27)  .      1_554  N
  O3        Ca2              2.114(25)  .      2_545  N
  O3        Ca2              2.349(25)  .      4_565  N
  O3        Ca2              4.955(24)  .     12_546  N
  O3        Ca2              4.766(22)  .     14_654  N
  O3        Ca2              3.633(26)  .    105_655  N
  O3        Ca2              3.720(29)  .    107_654  N
  O3        O3               1.102(29)  .     14_554  N
  O3        O3               1.102(29)  .    121_555  N
  O3        O3                 1.52(4)  .    123_655  N

loop_
      _geom_angle_atom_site_label_1
      _geom_angle_atom_site_label_2
      _geom_angle_atom_site_label_3
      _geom_angle
      _geom_angle_site_symmetry_1
      _geom_angle_site_symmetry_2
      _geom_angle_site_symmetry_3
      _geom_angle_publ_flag
  Ca1       Ca1       Ca1                   60.0      2_546  .      3_645  N
  Ca1       Ca1       Ca1            125.336(20)      2_546  .     11_565  N
  Ca1       Ca1       Ca1             145.702(5)      2_546  .    112_647  N
  Ca1       Ca1       Al1             99.035(21)      2_546  .      4_566  N
  Ca1       Ca1       Al1              54.187(7)      2_546  .     16_435  N
  Ca1       Ca1       Al2             62.668(10)      2_546  .      2_546  N
  Ca1       Ca1       O2              40.350(10)      2_546  .      1_555  N
  Ca1       Ca1       O2             164.883(21)      2_546  .     10_556  N
  Ca1       Ca1       O1              80.024(10)      2_546  .      1_555  N
  Ca1       Ca1       O1               39.135(9)      2_546  .      2_546  N
  Ca1       Ca1       O1             102.551(19)      2_546  .     10_556  N
  Ca1       Ca1       O1              90.312(20)      2_546  .     11_565  N
  Ca1       Ca1       Ca2            117.332(10)      2_546  .      1_555  N
  Ca1       Ca1       Ca2              10.92(10)      2_546  .      2_546  N
  Ca1       Ca1       Ca2              122.52(5)      2_546  .     11_565  N
  Ca1       Ca1       O3                131.1(5)      2_546  .      3_655  N
  Ca1       Ca1       O3                103.1(5)      2_546  .    119_547  N
  Ca1       Ca1       Ca1             145.702(5)      3_645  .     11_565  N
  Ca1       Ca1       Ca1            138.396(21)      3_645  .    112_647  N
  Ca1       Ca1       Al1            156.388(16)      3_645  .      4_566  N
  Ca1       Ca1       Al1              54.187(7)      3_645  .     16_435  N
  Ca1       Ca1       Al2            110.802(10)      3_645  .      2_546  N
  Ca1       Ca1       O2              40.351(10)      3_645  .      1_555  N
  Ca1       Ca1       O2             127.218(26)      3_645  .     10_556  N
  Ca1       Ca1       O1              43.154(15)      3_645  .      1_555  N
  Ca1       Ca1       O1              77.814(10)      3_645  .      2_546  N
  Ca1       Ca1       O1             134.060(11)      3_645  .     10_556  N
  Ca1       Ca1       O1             143.788(19)      3_645  .     11_565  N
  Ca1       Ca1       Ca2             69.198(10)      3_645  .      1_555  N
  Ca1       Ca1       Ca2               68.79(8)      3_645  .      2_546  N
  Ca1       Ca1       Ca2             134.87(10)      3_645  .     11_565  N
  Ca1       Ca1       O3                 76.7(6)      3_645  .      3_655  N
  Ca1       Ca1       O3                 63.0(6)      3_645  .    119_547  N
  Ca1       Ca1       Ca1                   60.0     11_565  .    112_647  N
  Ca1       Ca1       Al1              54.187(7)     11_565  .      4_566  N
  Ca1       Ca1       Al1             99.035(21)     11_565  .     16_435  N
  Ca1       Ca1       Al2             62.668(10)     11_565  .      2_546  N
  Ca1       Ca1       O2             164.883(21)     11_565  .      1_555  N
  Ca1       Ca1       O2              40.350(10)     11_565  .     10_556  N
  Ca1       Ca1       O1             102.551(19)     11_565  .      1_555  N
  Ca1       Ca1       O1              90.312(20)     11_565  .      2_546  N
  Ca1       Ca1       O1              80.024(10)     11_565  .     10_556  N
  Ca1       Ca1       O1               39.135(9)     11_565  .     11_565  N
  Ca1       Ca1       Ca2            117.332(10)     11_565  .      1_555  N
  Ca1       Ca1       Ca2              122.52(5)     11_565  .      2_546  N
  Ca1       Ca1       Ca2              10.92(10)     11_565  .     11_565  N
  Ca1       Ca1       O3                103.1(5)     11_565  .      3_655  N
  Ca1       Ca1       O3                131.1(5)     11_565  .    119_547  N
  Ca1       Ca1       Al1              54.187(7)    112_656  .      4_566  N
  Ca1       Ca1       Al1            156.387(16)    112_656  .     16_435  N
  Ca1       Ca1       Al2            110.802(10)    112_557  .      2_546  N
  Ca1       Ca1       O2             127.218(26)    112_556  .      1_555  N
  Ca1       Ca1       O2              40.351(10)    112_556  .     10_556  N
  Ca1       Ca1       O1             134.060(11)    112_646  .      1_555  N
  Ca1       Ca1       O1             143.788(19)    112_646  .      2_546  N
  Ca1       Ca1       O1              43.154(15)    112_646  .     10_556  N
  Ca1       Ca1       O1              77.814(10)    112_646  .     11_565  N
  Ca1       Ca1       Ca2             69.198(10)    112_556  .      1_555  N
  Ca1       Ca1       Ca2             134.87(10)    112_556  .      2_546  N
  Ca1       Ca1       Ca2               68.79(8)    112_556  .     11_565  N
  Ca1       Ca1       O3                 63.0(6)    112_547  .      3_655  N
  Ca1       Ca1       O3                 76.7(6)    112_547  .    119_547  N
  Al1       Ca1       Al1            124.424(21)      4_566  .     16_435  N
  Al1       Ca1       Al2             62.212(10)      4_566  .      2_546  N
  Al1       Ca1       O2             116.798(12)      4_566  .      1_555  N
  Al1       Ca1       O2              75.852(16)      4_566  .     10_556  N
  Al1       Ca1       O1             150.933(23)      4_566  .      1_555  N
  Al1       Ca1       O1              92.474(19)      4_566  .      2_546  N
  Al1       Ca1       O1              33.974(11)      4_566  .     10_556  N
  Al1       Ca1       O1              34.389(10)      4_566  .     11_565  N
  Al1       Ca1       Ca2            117.788(10)      4_566  .      1_555  N
  Al1       Ca1       Ca2              89.24(10)      4_566  .      2_546  N
  Al1       Ca1       Ca2               64.03(9)      4_566  .     11_565  N
  Al1       Ca1       O3                116.3(6)      4_566  .      3_655  N
  Al1       Ca1       O3                117.0(6)      4_566  .    119_547  N
  Al1       Ca1       Al2             62.212(10)     16_435  .      2_546  N
  Al1       Ca1       O2              75.852(16)     16_435  .      1_555  N
  Al1       Ca1       O2             116.797(12)     16_435  .     10_556  N
  Al1       Ca1       O1              33.974(11)     16_435  .      1_555  N
  Al1       Ca1       O1              34.389(10)     16_435  .      2_546  N
  Al1       Ca1       O1             150.934(23)     16_435  .     10_556  N
  Al1       Ca1       O1              92.475(19)     16_435  .     11_565  N
  Al1       Ca1       Ca2            117.788(10)     16_435  .      1_555  N
  Al1       Ca1       Ca2               64.03(9)     16_435  .      2_546  N
  Al1       Ca1       Ca2              89.24(10)     16_435  .     11_565  N
  Al1       Ca1       O3                117.0(6)     16_435  .      3_655  N
  Al1       Ca1       O3                116.3(6)     16_435  .    119_547  N
  Al2       Ca1       O2             102.790(16)      2_546  .      1_555  N
  Al2       Ca1       O2             102.790(16)      2_546  .     10_556  N
  Al2       Ca1       O1              92.752(18)      2_546  .      1_555  N
  Al2       Ca1       O1              32.992(11)      2_546  .      2_546  N
  Al2       Ca1       O1              92.752(18)      2_546  .     10_556  N
  Al2       Ca1       O1              32.992(11)      2_546  .     11_565  N
  Al2       Ca1       Ca2                  180.0      2_546  .      1_555  N
  Al2       Ca1       Ca2             61.061(17)      2_546  .      2_546  N
  Al2       Ca1       Ca2             61.061(17)      2_546  .     11_565  N
  Al2       Ca1       O3                164.2(4)      2_546  .      3_655  N
  Al2       Ca1       O3                164.2(4)      2_546  .    119_547  N
  O2        Ca1       O2             154.419(32)      1_555  .     10_556  N
  O2        Ca1       O1              81.302(17)      1_555  .      1_555  N
  O2        Ca1       O1              77.428(17)      1_555  .      2_546  N
  O2        Ca1       O1              97.468(18)      1_555  .     10_556  N
  O2        Ca1       O1             126.088(19)      1_555  .     11_565  N
  O2        Ca1       Ca2             77.210(16)      1_555  .      1_555  N
  O2        Ca1       Ca2             42.413(28)      1_555  .      2_546  N
  O2        Ca1       Ca2              162.28(7)      1_555  .     11_565  N
  O2        Ca1       O3                 91.9(5)      1_555  .      3_655  N
  O2        Ca1       O3                 62.7(5)      1_555  .    119_547  N
  O2        Ca1       O1              97.468(18)     10_556  .      1_555  N
  O2        Ca1       O1             126.088(19)     10_556  .      2_546  N
  O2        Ca1       O1              81.302(17)     10_556  .     10_556  N
  O2        Ca1       O1              77.428(17)     10_556  .     11_565  N
  O2        Ca1       Ca2             77.210(16)     10_556  .      1_555  N
  O2        Ca1       Ca2              162.28(7)     10_556  .      2_546  N
  O2        Ca1       Ca2             42.413(28)     10_556  .     11_565  N
  O2        Ca1       O3                 62.7(5)     10_556  .      3_655  N
  O2        Ca1       O3                 91.9(5)     10_556  .    119_547  N
  O1        Ca1       O1              68.321(21)      1_555  .      2_546  N
  O1        Ca1       O1               174.50(4)      1_555  .     10_556  N
  O1        Ca1       O1             116.740(20)      1_555  .     11_565  N
  O1        Ca1       Ca2             87.248(18)      1_555  .      1_555  N
  O1        Ca1       Ca2              90.94(10)      1_555  .      2_546  N
  O1        Ca1       Ca2              91.73(11)      1_555  .     11_565  N
  O1        Ca1       O3                 83.5(6)      1_555  .      3_655  N
  O1        Ca1       O3                 91.2(6)      1_555  .    119_547  N
  O1        Ca1       O1             116.740(20)      2_546  .     10_556  N
  O1        Ca1       O1              65.983(23)      2_546  .     11_565  N
  O1        Ca1       Ca2            147.008(11)      2_546  .      1_555  N
  O1        Ca1       Ca2               43.77(5)      2_546  .      2_546  N
  O1        Ca1       Ca2               84.86(6)      2_546  .     11_565  N
  O1        Ca1       O3                151.0(6)      2_546  .      3_655  N
  O1        Ca1       O3                137.7(6)      2_546  .    119_547  N
  O1        Ca1       O1              68.321(21)     10_556  .     11_565  N
  O1        Ca1       Ca2             87.248(18)     10_556  .      1_555  N
  O1        Ca1       Ca2              91.73(11)     10_556  .      2_546  N
  O1        Ca1       Ca2              90.94(10)     10_556  .     11_565  N
  O1        Ca1       O3                 91.2(6)     10_556  .      3_655  N
  O1        Ca1       O3                 83.5(6)     10_556  .    119_547  N
  O1        Ca1       Ca2            147.008(11)     11_565  .      1_555  N
  O1        Ca1       Ca2               84.86(6)     11_565  .      2_546  N
  O1        Ca1       Ca2               43.77(5)     11_565  .     11_565  N
  O1        Ca1       O3                137.7(6)     11_565  .      3_655  N
  O1        Ca1       O3                151.0(6)     11_565  .    119_547  N
  Ca2       Ca1       Ca2            118.939(17)      1_555  .      2_546  N
  Ca2       Ca1       Ca2            118.939(17)      1_555  .     11_565  N
  Ca2       Ca1       O3                 15.8(4)      1_555  .      3_655  N
  Ca2       Ca1       O3                 15.8(4)      1_555  .    119_547  N
  Ca2       Ca1       Ca2            122.122(34)      2_546  .     11_565  N
  Ca2       Ca1       O3                134.1(4)      2_546  .      3_655  N
  Ca2       Ca1       O3                103.6(4)      2_546  .    119_547  N
  Ca2       Ca1       O3                103.6(4)     11_565  .      3_655  N
  Ca2       Ca1       O3                134.1(4)     11_565  .    119_547  N
  O3        Ca1       O3                 31.6(8)      3_655  .    119_547  N
  Ca1       Al1       Ca1             71.626(15)     13_646  .     14_655  N
  Ca1       Al1       Ca1             71.627(15)     13_646  .     15_556  N
  Ca1       Al1       O2              137.494(9)     13_646  .      1_555  N
  Ca1       Al1       O1              53.838(21)     13_646  .    116_535  N
  Ca1       Al1       O1              47.485(21)     13_646  .    117_634  N
  Ca1       Al1       O1             105.584(33)     13_646  .    118_544  N
  Ca1       Al1       Ca2              100.39(9)     13_646  .      1_555  N
  Ca1       Al1       Ca2             164.32(10)     13_646  .      2_546  N
  Ca1       Al1       Ca2            119.493(32)     13_646  .      3_645  N
  Ca1       Al1       Ca1             71.626(15)     14_655  .     15_556  N
  Ca1       Al1       O2              137.492(9)     14_655  .      1_555  N
  Ca1       Al1       O1             105.584(33)     14_655  .    116_535  N
  Ca1       Al1       O1              53.838(21)     14_655  .    117_634  N
  Ca1       Al1       O1              47.484(21)     14_655  .    118_544  N
  Ca1       Al1       Ca2            119.492(32)     14_655  .      1_555  N
  Ca1       Al1       Ca2              100.39(9)     14_655  .      2_546  N
  Ca1       Al1       Ca2             164.32(10)     14_655  .      3_645  N
  Ca1       Al1       O2              137.497(9)     15_556  .      1_555  N
  Ca1       Al1       O1              47.485(21)     15_556  .    116_535  N
  Ca1       Al1       O1             105.584(33)     15_556  .    117_634  N
  Ca1       Al1       O1              53.838(21)     15_556  .    118_544  N
  Ca1       Al1       Ca2             164.32(10)     15_556  .      1_555  N
  Ca1       Al1       Ca2            119.493(32)     15_556  .      2_546  N
  Ca1       Al1       Ca2              100.39(9)     15_556  .      3_645  N
  O2        Al1       O1             116.803(25)      1_555  .    116_535  N
  O2        Al1       O1             116.799(25)      1_555  .    117_634  N
  O2        Al1       O1             116.801(25)      1_555  .    118_544  N
  O2        Al1       Ca2               42.31(7)      1_555  .      1_555  N
  O2        Al1       Ca2               42.31(7)      1_555  .      2_546  N
  O2        Al1       Ca2               42.32(7)      1_555  .      3_645  N
  O1        Al1       O1             101.247(31)    116_535  .    117_634  N
  O1        Al1       O1             101.248(31)    116_535  .    118_544  N
  O1        Al1       Ca2             116.87(10)    116_445  .      1_555  N
  O1        Al1       Ca2             141.66(10)    116_445  .      2_546  N
  O1        Al1       Ca2               76.35(4)    116_445  .      3_645  N
  O1        Al1       O1             101.246(31)    117_634  .    118_544  N
  O1        Al1       Ca2               76.35(4)    117_544  .      1_555  N
  O1        Al1       Ca2             116.87(10)    117_544  .      2_546  N
  O1        Al1       Ca2             141.66(10)    117_544  .      3_645  N
  O1        Al1       Ca2             141.66(10)    118_454  .      1_555  N
  O1        Al1       Ca2               76.35(4)    118_454  .      2_546  N
  O1        Al1       Ca2             116.87(10)    118_454  .      3_645  N
  Ca2       Al1       Ca2              71.32(10)      1_555  .      2_546  N
  Ca2       Al1       Ca2              71.32(10)      1_555  .      3_645  N
  Ca2       Al1       Ca2              71.32(10)      2_546  .      3_645  N
  Ca1       Al2       Ca1                  180.0      3_645  .      5_646  N
  Ca1       Al2       O1              52.597(15)      3_645  .      1_555  N
  Ca1       Al2       O1              52.597(15)      3_645  .      7_745  N
  Ca1       Al2       O1             127.403(15)      3_645  .    104_655  N
  Ca1       Al2       O1             127.403(15)      3_645  .    113_635  N
  Ca1       Al2       O1             127.403(15)      5_646  .      1_555  N
  Ca1       Al2       O1             127.403(15)      5_646  .      7_745  N
  Ca1       Al2       O1              52.597(15)      5_646  .    104_655  N
  Ca1       Al2       O1              52.597(15)      5_646  .    113_635  N
  O1        Al2       O1             105.193(29)      1_555  .      7_745  N
  O1        Al2       O1             111.652(15)      1_555  .    104_655  N
  O1        Al2       O1             111.652(15)      1_555  .    113_635  N
  O1        Al2       O1             111.652(15)      7_745  .    104_655  N
  O1        Al2       O1             111.652(15)      7_745  .    113_635  N
  O1        Al2       O1             105.193(29)    104_655  .    113_635  N
  Ca1       O2        Ca1             99.301(21)      1_555  .      2_546  N
  Ca1       O2        Ca1             99.300(21)      1_555  .      3_645  N
  Ca1       O2        Al1            118.360(16)      1_555  .      1_555  N
  Ca1       O2        Ca2              17.00(15)      1_555  .      1_555  N
  Ca1       O2        Ca2               93.98(5)      1_555  .      2_546  N
  Ca1       O2        Ca2             116.20(15)      1_555  .      3_645  N
  Ca1       O2        Ca1             99.299(21)      2_546  .      3_645  N
  Ca1       O2        Al1            118.358(16)      2_546  .      1_555  N
  Ca1       O2        Ca2             116.20(15)      2_546  .      1_555  N
  Ca1       O2        Ca2              17.00(15)      2_546  .      2_546  N
  Ca1       O2        Ca2               93.97(5)      2_546  .      3_645  N
  Ca1       O2        Al1            118.355(16)      3_645  .      1_555  N
  Ca1       O2        Ca2               93.98(5)      3_645  .      1_555  N
  Ca1       O2        Ca2             116.20(15)      3_645  .      2_546  N
  Ca1       O2        Ca2              17.00(15)      3_645  .      3_645  N
  Al1       O2        Ca2             108.22(10)      1_555  .      1_555  N
  Al1       O2        Ca2             108.22(10)      1_555  .      2_546  N
  Al1       O2        Ca2             108.21(10)      1_555  .      3_645  N
  Ca2       O2        Ca2              110.70(9)      1_555  .      2_546  N
  Ca2       O2        Ca2              110.70(9)      1_555  .      3_645  N
  Ca2       O2        Ca2              110.69(9)      2_546  .      3_645  N
  Ca1       O1        Ca1             97.711(18)      1_555  .      3_645  N
  Ca1       O1        Al1             98.541(27)      1_555  .     16_435  N
  Ca1       O1        Al2            122.687(24)      1_555  .      1_555  N
  Ca1       O1        Ca2              17.02(14)      1_555  .      1_555  N
  Ca1       O1        Al1             91.773(23)      3_645  .     16_435  N
  Ca1       O1        Al2             94.411(20)      3_645  .      1_555  N
  Ca1       O1        Ca2               89.56(8)      3_645  .      1_555  N
  Al1       O1        Al2            136.868(31)     16_435  .      1_555  N
  Al1       O1        Ca2             113.86(13)     16_435  .      1_555  N
  Al2       O1        Ca2             108.84(13)      1_555  .      1_555  N
  Ca1       Ca2       Ca1              99.88(10)      1_555  .      3_645  N
  Ca1       Ca2       Ca1              99.88(10)      1_555  .    112_647  N
  Ca1       Ca2       Al1             104.30(11)      1_555  .      1_555  N
  Ca1       Ca2       Al1             104.30(11)      1_555  .     10_556  N
  Ca1       Ca2       O2               85.79(16)      1_555  .      1_555  N
  Ca1       Ca2       O2               85.79(16)      1_555  .     10_556  N
  Ca1       Ca2       O1               75.73(15)      1_555  .      1_555  N
  Ca1       Ca2       O1               75.73(15)      1_555  .     10_556  N
  Ca1       Ca2       Ca2               51.88(9)      1_555  .      2_546  N
  Ca1       Ca2       Ca2              98.87(10)      1_555  .      3_645  N
  Ca1       Ca2       Ca2               51.88(9)      1_555  .     11_565  N
  Ca1       Ca2       Ca2              98.87(10)      1_555  .    112_556  N
  Ca1       Ca2       O3                159.0(5)      1_555  .      3_655  N
  Ca1       Ca2       O3                161.1(5)      1_555  .     13_645  N
  Ca1       Ca2       O3                159.0(5)      1_555  .    119_547  N
  Ca1       Ca2       O3                161.1(5)      1_555  .    120_556  N
  Ca1       Ca2       Ca1             160.24(21)      3_645  .    112_647  N
  Ca1       Ca2       Al1             63.095(24)      3_645  .      1_555  N
  Ca1       Ca2       Al1              111.58(7)      3_645  .     10_556  N
  Ca1       Ca2       O2              43.612(19)      3_645  .      1_555  N
  Ca1       Ca2       O2               138.52(4)      3_645  .     10_556  N
  Ca1       Ca2       O1              46.666(26)      3_645  .      1_555  N
  Ca1       Ca2       O1             140.426(32)      3_645  .     10_556  N
  Ca1       Ca2       Ca2               66.44(4)      3_645  .      2_546  N
  Ca1       Ca2       Ca2                9.18(7)      3_645  .      3_645  N
  Ca1       Ca2       Ca2             127.70(18)      3_645  .     11_565  N
  Ca1       Ca2       Ca2             159.11(16)      3_645  .    112_556  N
  Ca1       Ca2       O3                 89.7(8)      3_645  .      3_655  N
  Ca1       Ca2       O3                 63.4(6)      3_645  .     13_645  N
  Ca1       Ca2       O3                 71.6(8)      3_645  .    119_547  N
  Ca1       Ca2       O3                 97.1(6)      3_645  .    120_556  N
  Ca1       Ca2       Al1              111.58(7)    112_656  .      1_555  N
  Ca1       Ca2       Al1             63.095(24)    112_656  .     10_556  N
  Ca1       Ca2       O2               138.52(4)    112_556  .      1_555  N
  Ca1       Ca2       O2              43.612(19)    112_556  .     10_556  N
  Ca1       Ca2       O1             140.426(32)    112_646  .      1_555  N
  Ca1       Ca2       O1              46.666(26)    112_646  .     10_556  N
  Ca1       Ca2       Ca2             127.70(18)    112_556  .      2_546  N
  Ca1       Ca2       Ca2             159.11(16)    112_556  .      3_645  N
  Ca1       Ca2       Ca2               66.44(4)    112_556  .     11_565  N
  Ca1       Ca2       Ca2                9.18(7)    112_556  .    112_556  N
  Ca1       Ca2       O3                 71.6(8)    112_547  .      3_655  N
  Ca1       Ca2       O3                 97.1(6)    112_547  .     13_645  N
  Ca1       Ca2       O3                 89.7(8)    112_547  .    119_547  N
  Ca1       Ca2       O3                 63.4(6)    112_547  .    120_556  N
  Al1       Ca2       Al1             151.40(21)      1_555  .     10_556  N
  Al1       Ca2       O2                29.47(4)      1_555  .      1_555  N
  Al1       Ca2       O2              155.08(11)      1_555  .     10_556  N
  Al1       Ca2       O1             107.527(15)      1_555  .      1_555  N
  Al1       Ca2       O1              79.665(17)      1_555  .     10_556  N
  Al1       Ca2       Ca2               54.34(5)      1_555  .      2_546  N
  Al1       Ca2       Ca2               54.34(5)      1_555  .      3_645  N
  Al1       Ca2       Ca2             152.61(12)      1_555  .     11_565  N
  Al1       Ca2       Ca2             120.45(14)      1_555  .    112_556  N
  Al1       Ca2       O3                 96.7(6)      1_555  .      3_655  N
  Al1       Ca2       O3                 76.7(8)      1_555  .     13_645  N
  Al1       Ca2       O3                 54.7(5)      1_555  .    119_547  N
  Al1       Ca2       O3                 76.3(8)      1_555  .    120_556  N
  Al1       Ca2       O2              155.08(11)     10_556  .      1_555  N
  Al1       Ca2       O2                29.47(4)     10_556  .     10_556  N
  Al1       Ca2       O1              79.665(17)     10_556  .      1_555  N
  Al1       Ca2       O1             107.527(15)     10_556  .     10_556  N
  Al1       Ca2       Ca2             152.61(12)     10_556  .      2_546  N
  Al1       Ca2       Ca2             120.45(14)     10_556  .      3_645  N
  Al1       Ca2       Ca2               54.34(5)     10_556  .     11_565  N
  Al1       Ca2       Ca2               54.34(5)     10_556  .    112_556  N
  Al1       Ca2       O3                 54.7(5)     10_556  .      3_655  N
  Al1       Ca2       O3                 76.3(8)     10_556  .     13_645  N
  Al1       Ca2       O3                 96.7(6)     10_556  .    119_547  N
  Al1       Ca2       O3                 76.7(8)     10_556  .    120_556  N
  O2        Ca2       O2              171.57(31)      1_555  .     10_556  N
  O2        Ca2       O1                80.93(5)      1_555  .      1_555  N
  O2        Ca2       O1                96.97(6)      1_555  .     10_556  N
  O2        Ca2       Ca2               34.65(5)      1_555  .      2_546  N
  O2        Ca2       Ca2               34.65(5)      1_555  .      3_645  N
  O2        Ca2       Ca2             137.05(26)      1_555  .     11_565  N
  O2        Ca2       Ca2             147.70(11)      1_555  .    112_556  N
  O2        Ca2       O3                113.5(6)      1_555  .      3_655  N
  O2        Ca2       O3                 86.9(7)      1_555  .     13_645  N
  O2        Ca2       O3                 74.8(6)      1_555  .    119_547  N
  O2        Ca2       O3                101.1(7)      1_555  .    120_556  N
  O2        Ca2       O1                96.97(6)     10_556  .      1_555  N
  O2        Ca2       O1                80.93(5)     10_556  .     10_556  N
  O2        Ca2       Ca2             137.05(26)     10_556  .      2_546  N
  O2        Ca2       Ca2             147.70(11)     10_556  .      3_645  N
  O2        Ca2       Ca2               34.65(5)     10_556  .     11_565  N
  O2        Ca2       Ca2               34.65(5)     10_556  .    112_556  N
  O2        Ca2       O3                 74.8(6)     10_556  .      3_655  N
  O2        Ca2       O3                101.1(7)     10_556  .     13_645  N
  O2        Ca2       O3                113.5(6)     10_556  .    119_547  N
  O2        Ca2       O3                 86.9(7)     10_556  .    120_556  N
  O1        Ca2       O1              151.46(30)      1_555  .     10_556  N
  O1        Ca2       Ca2             80.899(17)      1_555  .      2_546  N
  O1        Ca2       Ca2               54.29(8)      1_555  .      3_645  N
  O1        Ca2       Ca2              81.60(20)      1_555  .     11_565  N
  O1        Ca2       Ca2             131.28(10)      1_555  .    112_556  N
  O1        Ca2       O3                 98.3(8)      1_555  .      3_655  N
  O1        Ca2       O3                 86.0(5)      1_555  .     13_645  N
  O1        Ca2       O3                108.4(8)      1_555  .    119_547  N
  O1        Ca2       O3                122.5(6)      1_555  .    120_556  N
  O1        Ca2       Ca2              81.60(20)     10_556  .      2_546  N
  O1        Ca2       Ca2             131.28(10)     10_556  .      3_645  N
  O1        Ca2       Ca2             80.899(17)     10_556  .     11_565  N
  O1        Ca2       Ca2               54.29(8)     10_556  .    112_556  N
  O1        Ca2       O3                108.4(8)     10_556  .      3_655  N
  O1        Ca2       O3                122.5(6)     10_556  .     13_645  N
  O1        Ca2       O3                 98.3(8)     10_556  .    119_547  N
  O1        Ca2       O3                 86.0(5)     10_556  .    120_556  N
  Ca2       Ca2       Ca2                   60.0      2_546  .      3_645  N
  Ca2       Ca2       Ca2             103.77(17)      2_546  .     11_565  N
  Ca2       Ca2       Ca2             133.66(14)      2_546  .    112_556  N
  Ca2       Ca2       O3                148.1(6)      2_546  .      3_655  N
  Ca2       Ca2       O3                121.3(7)      2_546  .     13_645  N
  Ca2       Ca2       O3                107.6(6)      2_546  .    119_547  N
  Ca2       Ca2       O3                130.4(8)      2_546  .    120_556  N
  Ca2       Ca2       Ca2             133.66(14)      3_645  .     11_565  N
  Ca2       Ca2       Ca2             162.26(21)      3_645  .    112_556  N
  Ca2       Ca2       O3                 93.5(8)      3_645  .      3_655  N
  Ca2       Ca2       O3                 66.0(6)      3_645  .     13_645  N
  Ca2       Ca2       O3                 69.6(8)      3_645  .    119_547  N
  Ca2       Ca2       O3                 96.6(6)      3_645  .    120_556  N
  Ca2       Ca2       Ca2                   60.0     11_565  .    112_556  N
  Ca2       Ca2       O3                107.6(6)     11_565  .      3_655  N
  Ca2       Ca2       O3                130.4(8)     11_565  .     13_645  N
  Ca2       Ca2       O3                148.1(6)     11_565  .    119_547  N
  Ca2       Ca2       O3                121.3(7)     11_565  .    120_556  N
  Ca2       Ca2       O3                 69.6(8)    112_547  .      3_655  N
  Ca2       Ca2       O3                 96.6(6)    112_547  .     13_645  N
  Ca2       Ca2       O3                 93.5(8)    112_547  .    119_547  N
  Ca2       Ca2       O3                 66.0(6)    112_547  .    120_556  N
  O3        Ca2       O3                 28.0(7)      3_655  .     13_645  N
  O3        Ca2       O3                42.1(11)      3_655  .    119_547  N
  O3        Ca2       O3                 28.0(7)      3_655  .    120_556  N
  O3        Ca2       O3                 28.0(7)     13_645  .    119_547  N
  O3        Ca2       O3                37.7(10)     13_645  .    120_556  N
  O3        Ca2       O3                 28.0(7)    119_547  .    120_556  N
  Ca1       O3        Ca2               5.23(15)      2_545  .      2_545  N
  Ca1       O3        Ca2               145.3(9)      2_545  .      4_565  N
  Ca1       O3        O3                91.7(25)      2_545  .     14_554  N
  Ca1       O3        O3                91.7(25)      2_545  .    121_546  N
  Ca1       O3        O3                 74.2(4)      2_545  .    123_645  N
  Ca2       O3        Ca2              140.1(10)      2_545  .      4_565  N
  Ca2       O3        O3                87.9(24)      2_545  .     14_554  N
  Ca2       O3        O3                87.9(24)      2_545  .    121_546  N
  Ca2       O3        O3                 69.0(5)      2_545  .    123_645  N
  Ca2       O3        O3                64.1(23)      4_565  .     14_554  N
  Ca2       O3        O3                64.1(23)      4_565  .    121_546  N
  Ca2       O3        O3                 71.1(5)      4_565  .    123_645  N
  O3        O3        O3                87.1(11)     14_554  .    121_546  N
  O3        O3        O3                 46.5(6)     14_554  .    123_645  N
  O3        O3        O3                 46.5(6)    121_546  .    123_645  N

#--eof--eof--eof--eof--eof--eof--eof--eof--eof--eof--eof--eof--eof--eof--eof--#

#===END
 
data_C12A7_esc_RT
 
_audit_creation_method            SHELXL-97
_chemical_name_systematic
;
 ?
;
_chemical_name_common             Mayenite
_chemical_melting_point           ?
_chemical_formula_moiety          ?
_chemical_formula_sum
 'Al14 Ca12 O33'
_chemical_formula_weight          1386.72
 
loop_
 _atom_type_symbol
 _atom_type_description
 _atom_type_scat_dispersion_real
 _atom_type_scat_dispersion_imag
 _atom_type_scat_source
 'O'  'O'   0.0106   0.0060
 'International Tables Vol C Tables 4.2.6.8 and 6.1.1.4'
 'Al'  'Al'   0.0645   0.0514
 'International Tables Vol C Tables 4.2.6.8 and 6.1.1.4'
 'Ca'  'Ca'   0.2262   0.3064
 'International Tables Vol C Tables 4.2.6.8 and 6.1.1.4'
 
_symmetry_cell_setting            Cubic
_symmetry_space_group_name_H-M   I-43d
 
loop_
 _symmetry_equiv_pos_as_xyz
 'x, y, z'
 'x, -y, -z+1/2'
 '-x, -y+1/2, z'
 '-x, y+1/2, -z+1/2'
 'y+1/4, -x+3/4, -z+1/4'
 '-y+1/4, -x+3/4, z+3/4'
 '-y+3/4, x+3/4, -z+1/4'
 'y+3/4, x+3/4, z+3/4'
 'y, z, x'
 '-y, -z+1/2, x'
 'y, -z, -x+1/2'
 '-y, z+1/2, -x+1/2'
 'z+1/4, -y+3/4, -x+1/4'
 'z+1/4, y+1/4, x+1/4'
 '-z+3/4, y+3/4, -x+1/4'
 '-z+3/4, -y+1/4, x+1/4'
 'z, x, y'
 '-z+1/2, x, -y'
 '-z, -x+1/2, y'
 'z+1/2, -x+1/2, -y'
 'x+3/4, z+3/4, y+3/4'
 'x+3/4, -z+1/4, -y+3/4'
 '-x+3/4, z+3/4, -y+1/4'
 '-x+1/4, -z+3/4, y+3/4'
 'x+1/2, y+1/2, z+1/2'
 'x+1/2, -y+1/2, -z+1'
 '-x+1/2, -y+1, z+1/2'
 '-x+1/2, y+1, -z+1'
 'y+3/4, -x+5/4, -z+3/4'
 '-y+3/4, -x+5/4, z+5/4'
 '-y+5/4, x+5/4, -z+3/4'
 'y+5/4, x+5/4, z+5/4'
 'y+1/2, z+1/2, x+1/2'
 '-y+1/2, -z+1, x+1/2'
 'y+1/2, -z+1/2, -x+1'
 '-y+1/2, z+1, -x+1'
 'z+3/4, -y+5/4, -x+3/4'
 'z+3/4, y+3/4, x+3/4'
 '-z+5/4, y+5/4, -x+3/4'
 '-z+5/4, -y+3/4, x+3/4'
 'z+1/2, x+1/2, y+1/2'
 '-z+1, x+1/2, -y+1/2'
 '-z+1/2, -x+1, y+1/2'
 'z+1, -x+1, -y+1/2'
 'x+5/4, z+5/4, y+5/4'
 'x+5/4, -z+3/4, -y+5/4'
 '-x+5/4, z+5/4, -y+3/4'
 '-x+3/4, -z+5/4, y+5/4'
 
_cell_length_a                    11.9904(3)
_cell_length_b                    11.9904(3)
_cell_length_c                    11.9904(3)
_cell_angle_alpha                 90.00
_cell_angle_beta                  90.00
_cell_angle_gamma                 90.00
_cell_volume                      1723.86(7)
_cell_formula_units_Z             2
_cell_measurement_temperature     293(2)
_cell_measurement_reflns_used     25
_cell_measurement_theta_min       25
_cell_measurement_theta_max       30
 
_exptl_crystal_description        prism
_exptl_crystal_colour             'pale green'
_exptl_crystal_size_max           0.16
_exptl_crystal_size_mid           0.06
_exptl_crystal_size_min           0.03
_exptl_crystal_density_meas       ?
_exptl_crystal_density_diffrn     2.671
_exptl_crystal_density_method     'not measured'
_exptl_crystal_F_000              1372
_exptl_absorpt_coefficient_mu     2.292
_exptl_absorpt_correction_type    none
_exptl_absorpt_correction_T_min   ?
_exptl_absorpt_correction_T_max   ?
_exptl_absorpt_process_details    ?
 
_exptl_special_details
;
 ?
;
 
_diffrn_ambient_temperature       293(2)
_diffrn_radiation_wavelength      0.71073
_diffrn_radiation_type            MoK\a
_diffrn_radiation_source          'fine-focus sealed tube'
_diffrn_radiation_monochromator   graphite
_diffrn_measurement_device_type   'Nonius CAD-4 diffractometer'
_diffrn_measurement_method        '\w-2\q scan technique'
_diffrn_detector_area_resol_mean  ?
_diffrn_standards_number          3
_diffrn_standards_interval_count  200
_diffrn_standards_interval_time   3600
_diffrn_standards_decay_%          3.82
_diffrn_reflns_number             3516
_diffrn_reflns_av_R_equivalents   0.0558
_diffrn_reflns_av_sigmaI/netI     0.0226
_diffrn_reflns_limit_h_min        -16
_diffrn_reflns_limit_h_max        16
_diffrn_reflns_limit_k_min        -16
_diffrn_reflns_limit_k_max        16
_diffrn_reflns_limit_l_min        -16
_diffrn_reflns_limit_l_max        16
_diffrn_reflns_theta_min          4.16
_diffrn_reflns_theta_max          29.85
_reflns_number_total              422
_reflns_number_gt                 393
_reflns_threshold_expression      >2sigma(I)
 
_computing_data_collection      'CAD-4 EXPRESS (Enraf-Nonius, 1994)'
_computing_cell_refinement      'CRYSDA (Beurskens et al., 1992)'
_computing_data_reduction       'REFLEX (Garc\'ia-Granda et al., 1999)'
_computing_structure_solution           'DIRDIF (Beurskens et al., 1992)'
_computing_structure_refinement         'SHELXL97 (Sheldrick, 1997b)'
_computing_molecular_graphics           'PLATON (Spek, 1982)'
_computing_publication_material         'SHELXL97'
 
_refine_special_details
;
 Refinement of F^2^ against ALL reflections.  The weighted R-factor wR and
 goodness of fit S are based on F^2^, conventional R-factors R are based
 on F, with F set to zero for negative F^2^. The threshold expression of
 F^2^ > 2sigma(F^2^) is used only for calculating R-factors(gt) etc. and is
 not relevant to the choice of reflections for refinement.  R-factors based
 on F^2^ are statistically about twice as large as those based on F, and R-
 factors based on ALL data will be even larger.
;
 
_refine_ls_structure_factor_coef  Fsqd
_refine_ls_matrix_type            full
_refine_ls_weighting_scheme       calc
_refine_ls_weighting_details
 'calc w=1/[\s^2^(Fo^2^)+(0.0266P)^2^+15.1876P] where P=(Fo^2^+2Fc^2^)/3'
_atom_sites_solution_primary      direct
_atom_sites_solution_secondary    difmap
_atom_sites_solution_hydrogens    ?
_refine_ls_hydrogen_treatment     ?
_refine_ls_extinction_method      none
_refine_ls_extinction_coef        ?
_refine_ls_abs_structure_details
 'Flack H D (1983), Acta Cryst. A39, 876-881'
_refine_ls_abs_structure_Flack    0.01(10)
_refine_ls_number_reflns          422
_refine_ls_number_parameters      30
_refine_ls_number_restraints      0
_refine_ls_R_factor_all           0.0370
_refine_ls_R_factor_gt            0.0313
_refine_ls_wR_factor_ref          0.0813
_refine_ls_wR_factor_gt           0.0786
_refine_ls_goodness_of_fit_ref    1.118
_refine_ls_restrained_S_all       1.118
_refine_ls_shift/su_max           0.000
_refine_ls_shift/su_mean          0.000
 
loop_
 _atom_site_label
 _atom_site_type_symbol
 _atom_site_fract_x
 _atom_site_fract_y
 _atom_site_fract_z
 _atom_site_U_iso_or_equiv
 _atom_site_adp_type
 _atom_site_occupancy
 _atom_site_symmetry_multiplicity
 _atom_site_calc_flag
 _atom_site_refinement_flags
 _atom_site_disorder_assembly
 _atom_site_disorder_group
Ca1 Ca 0.89067(11) 0.0000 0.7500 0.0110(3) Uani 0.910(6) 2 d SP . .
Al1 Al 1.01883(9) 0.01883(9) 1.01883(9) 0.0104(4) Uani 1 3 d S . .
Al2 Al 1.0000 -0.2500 0.6250 0.0055(4) Uani 1 4 d S . .
O2 O 0.9353(2) -0.0647(2) 0.9353(2) 0.0111(9) Uani 1 3 d S . .
O1 O 0.9008(2) -0.1922(2) 0.7132(2) 0.0125(5) Uani 1 1 d . . .
Ca2 Ca 0.9522(10) 0.0000 0.7500 0.004(3) Uiso 0.090(6) 2 d SP . .
O3 O 0.696(7) 0.109(7) 0.000(11) 0.030 Uiso 0.038(8) 1 d P . .
 
loop_
 _atom_site_aniso_label
 _atom_site_aniso_U_11
 _atom_site_aniso_U_22
 _atom_site_aniso_U_33
 _atom_site_aniso_U_23
 _atom_site_aniso_U_13
 _atom_site_aniso_U_12
Ca1 0.0148(8) 0.0087(5) 0.0095(5) 0.0006(4) 0.000 0.000
Al1 0.0104(4) 0.0104(4) 0.0104(4) 0.0003(4) 0.0003(4) 0.0003(4)
Al2 0.0068(5) 0.0068(5) 0.0028(8) 0.000 0.000 0.000
O2 0.0111(9) 0.0111(9) 0.0111(9) -0.0035(9) -0.0035(9) -0.0035(9)
O1 0.0137(13) 0.0099(12) 0.0140(12) -0.0031(9) 0.0079(9) -0.0026(9)
 
_geom_special_details
;
 All esds (except the esd in the dihedral angle between two l.s. planes)
 are estimated using the full covariance matrix.  The cell esds are taken
 into account individually in the estimation of esds in distances, angles
 and torsion angles; correlations between esds in cell parameters are only
 used when they are defined by crystal symmetry.  An approximate (isotropic)
 treatment of cell esds is used for estimating esds involving l.s. planes.
;
 
loop_
 _geom_bond_atom_site_label_1
 _geom_bond_atom_site_label_2
 _geom_bond_distance
 _geom_bond_site_symmetry_2
 _geom_bond_publ_flag
Ca1 Ca2 0.738(12) . ?
Ca1 O1 2.349(3) 2_556 ?
Ca1 O1 2.349(3) . ?
Ca1 O2 2.414(2) . ?
Ca1 O2 2.414(2) 2_556 ?
Ca1 O1 2.534(3) 17_546 ?
Ca1 O1 2.534(3) 44_455 ?
Ca1 O3 2.70(9) 11_656 ?
Ca1 O3 2.70(9) 9_655 ?
Ca1 O3 3.07(9) 6_655 ?
Ca1 O3 3.07(9) 31_535 ?
Ca1 Al1 3.1413(14) 8_534 ?
Al1 O2 1.734(5) . ?
Al1 O1 1.780(3) 45_435 ?
Al1 O1 1.780(3) 14 ?
Al1 O1 1.780(3) 32_534 ?
Al1 Ca1 3.1413(14) 45_435 ?
Al1 Ca1 3.1413(14) 31_536 ?
Al1 Ca1 3.1413(14) 14 ?
Al1 Ca2 3.329(3) 9_645 ?
Al1 Ca2 3.329(3) . ?
Al1 Ca2 3.329(3) 17_546 ?
Al1 Ca2 3.545(8) 45_435 ?
Al1 Ca2 3.545(8) 31_536 ?
Al2 O1 1.736(3) 7_536 ?
Al2 O1 1.736(3) 3_745 ?
Al2 O1 1.736(3) 5_656 ?
Al2 O1 1.736(3) . ?
Al2 Ca1 3.1855(13) 13_546 ?
Al2 Ca1 3.1855(13) 9_645 ?
Al2 Ca2 3.400(2) 7_536 ?
Al2 Ca2 3.400(2) . ?
Al2 Ca2 3.400(2) 5_656 ?
Al2 Ca2 3.400(2) 3_745 ?
Al2 Ca1 3.5987(5) 7_536 ?
O2 Ca2 2.3623(18) 9_645 ?
O2 Ca2 2.3623(18) 17_546 ?
O2 Ca2 2.3623(18) . ?
O2 Ca1 2.414(2) 9_645 ?
O2 Ca1 2.414(2) 17_546 ?
O1 Al1 1.780(3) 8_534 ?
O1 Ca2 2.426(4) . ?
O1 Ca1 2.534(3) 9_645 ?
Ca2 O3 1.99(9) 11_656 ?
Ca2 O3 1.99(9) 9_655 ?
Ca2 O3 2.35(9) 6_655 ?
Ca2 O3 2.35(9) 31_535 ?
Ca2 O2 2.3623(18) 2_556 ?
Ca2 O1 2.426(4) 2_556 ?
Ca2 Al1 3.329(3) 2_556 ?
Ca2 Al2 3.400(2) 2_556 ?
O3 O3 0.99(13) 37_545 ?
O3 O3 0.99(13) 16_554 ?
O3 O3 1.29(17) 28_644 ?
O3 Ca2 1.99(9) 17_545 ?
O3 Ca2 2.35(9) 29 ?
O3 Ca1 2.70(9) 17_545 ?
O3 Ca1 3.07(9) 29 ?
 
loop_
 _geom_angle_atom_site_label_1
 _geom_angle_atom_site_label_2
 _geom_angle_atom_site_label_3
 _geom_angle
 _geom_angle_site_symmetry_1
 _geom_angle_site_symmetry_3
 _geom_angle_publ_flag
Ca2 Ca1 O1 87.02(8) . 2_556 ?
Ca2 Ca1 O1 87.02(8) . . ?
O1 Ca1 O1 174.05(16) 2_556 . ?
Ca2 Ca1 O2 77.18(6) . . ?
O1 Ca1 O2 97.51(10) 2_556 . ?
O1 Ca1 O2 81.16(10) . . ?
Ca2 Ca1 O2 77.18(6) . 2_556 ?
O1 Ca1 O2 81.16(10) 2_556 2_556 ?
O1 Ca1 O2 97.51(10) . 2_556 ?
O2 Ca1 O2 154.36(12) . 2_556 ?
Ca2 Ca1 O1 147.10(6) . 17_546 ?
O1 Ca1 O1 116.90(7) 2_556 17_546 ?
O1 Ca1 O1 68.58(13) . 17_546 ?
O2 Ca1 O1 77.51(10) . 17_546 ?
O2 Ca1 O1 126.08(7) 2_556 17_546 ?
Ca2 Ca1 O1 147.10(6) . 44_455 ?
O1 Ca1 O1 68.58(13) 2_556 44_455 ?
O1 Ca1 O1 116.90(7) . 44_455 ?
O2 Ca1 O1 126.08(7) . 44_455 ?
O2 Ca1 O1 77.51(10) 2_556 44_455 ?
O1 Ca1 O1 65.79(12) 17_546 44_455 ?
Ca2 Ca1 O3 13.8(18) . 11_656 ?
O1 Ca1 O3 85(3) 2_556 11_656 ?
O1 Ca1 O3 90(3) . 11_656 ?
O2 Ca1 O3 64(2) . 11_656 ?
O2 Ca1 O3 90(2) 2_556 11_656 ?
O1 Ca1 O3 139(2) 17_546 11_656 ?
O1 Ca1 O3 152(3) 44_455 11_656 ?
Ca2 Ca1 O3 13.8(18) . 9_655 ?
O1 Ca1 O3 90(3) 2_556 9_655 ?
O1 Ca1 O3 85(3) . 9_655 ?
O2 Ca1 O3 90(2) . 9_655 ?
O2 Ca1 O3 64(2) 2_556 9_655 ?
O1 Ca1 O3 152(3) 17_546 9_655 ?
O1 Ca1 O3 139(2) 44_455 9_655 ?
O3 Ca1 O3 28(4) 11_656 9_655 ?
Ca2 Ca1 O3 12.1(16) . 6_655 ?
O1 Ca1 O3 75.1(17) 2_556 6_655 ?
O1 Ca1 O3 98.9(16) . 6_655 ?
O2 Ca1 O3 81(2) . 6_655 ?
O2 Ca1 O3 74(2) 2_556 6_655 ?
O1 Ca1 O3 157(2) 17_546 6_655 ?
O1 Ca1 O3 136.3(18) 44_455 6_655 ?
O3 Ca1 O3 18(2) 11_656 6_655 ?
O3 Ca1 O3 18(2) 9_655 6_655 ?
Ca2 Ca1 O3 12.1(16) . 31_535 ?
O1 Ca1 O3 98.9(17) 2_556 31_535 ?
O1 Ca1 O3 75.1(16) . 31_535 ?
O2 Ca1 O3 74(2) . 31_535 ?
O2 Ca1 O3 81(2) 2_556 31_535 ?
O1 Ca1 O3 136.3(17) 17_546 31_535 ?
O1 Ca1 O3 157(2) 44_455 31_535 ?
O3 Ca1 O3 18(2) 11_656 31_535 ?
O3 Ca1 O3 18(2) 9_655 31_535 ?
O3 Ca1 O3 24(3) 6_655 31_535 ?
Ca2 Ca1 Al1 117.71(2) . 8_534 ?
O1 Ca1 Al1 151.18(9) 2_556 8_534 ?
O1 Ca1 Al1 34.13(7) . 8_534 ?
O2 Ca1 Al1 75.73(9) . 8_534 ?
O2 Ca1 Al1 116.92(5) 2_556 8_534 ?
O1 Ca1 Al1 34.50(6) 17_546 8_534 ?
O1 Ca1 Al1 92.47(7) 44_455 8_534 ?
O3 Ca1 Al1 116(3) 11_656 8_534 ?
O3 Ca1 Al1 118(3) 9_655 8_534 ?
O3 Ca1 Al1 129.8(16) 6_655 8_534 ?
O3 Ca1 Al1 105.6(16) 31_535 8_534 ?
O2 Al1 O1 116.66(10) . 45_435 ?
O2 Al1 O1 116.66(10) . 14 ?
O1 Al1 O1 101.42(12) 45_435 14 ?
O2 Al1 O1 116.66(10) . 32_534 ?
O1 Al1 O1 101.42(12) 45_435 32_534 ?
O1 Al1 O1 101.42(12) 14 32_534 ?
O2 Al1 Ca1 137.43(2) . 45_435 ?
O1 Al1 Ca1 47.76(9) 45_435 45_435 ?
O1 Al1 Ca1 53.74(10) 14 45_435 ?
O1 Al1 Ca1 105.81(11) 32_534 45_435 ?
O2 Al1 Ca1 137.43(2) . 31_536 ?
O1 Al1 Ca1 53.74(10) 45_435 31_536 ?
O1 Al1 Ca1 105.81(11) 14 31_536 ?
O1 Al1 Ca1 47.76(9) 32_534 31_536 ?
Ca1 Al1 Ca1 71.73(4) 45_435 31_536 ?
O2 Al1 Ca1 137.43(2) . 14 ?
O1 Al1 Ca1 105.81(11) 45_435 14 ?
O1 Al1 Ca1 47.76(9) 14 14 ?
O1 Al1 Ca1 53.74(10) 32_534 14 ?
Ca1 Al1 Ca1 71.73(4) 45_435 14 ?
Ca1 Al1 Ca1 71.73(4) 31_536 14 ?
O2 Al1 Ca2 42.54(13) . 9_645 ?
O1 Al1 Ca2 76.14(12) 45_435 9_645 ?
O1 Al1 Ca2 116.3(2) 14 9_645 ?
O1 Al1 Ca2 142.1(2) 32_534 9_645 ?
Ca1 Al1 Ca2 100.00(18) 45_435 9_645 ?
Ca1 Al1 Ca2 119.54(6) 31_536 9_645 ?
Ca1 Al1 Ca2 163.99(19) 14 9_645 ?
O2 Al1 Ca2 42.54(13) . . ?
O1 Al1 Ca2 116.3(2) 45_435 . ?
O1 Al1 Ca2 142.1(2) 14 . ?
O1 Al1 Ca2 76.14(12) 32_534 . ?
Ca1 Al1 Ca2 163.99(19) 45_435 . ?
Ca1 Al1 Ca2 100.00(18) 31_536 . ?
Ca1 Al1 Ca2 119.54(6) 14 . ?
Ca2 Al1 Ca2 71.7(2) 9_645 . ?
O2 Al1 Ca2 42.54(13) . 17_546 ?
O1 Al1 Ca2 142.1(2) 45_435 17_546 ?
O1 Al1 Ca2 76.14(12) 14 17_546 ?
O1 Al1 Ca2 116.3(2) 32_534 17_546 ?
Ca1 Al1 Ca2 119.54(6) 45_435 17_546 ?
Ca1 Al1 Ca2 163.99(19) 31_536 17_546 ?
Ca1 Al1 Ca2 100.00(18) 14 17_546 ?
Ca2 Al1 Ca2 71.7(2) 9_645 17_546 ?
Ca2 Al1 Ca2 71.7(2) . 17_546 ?
O2 Al1 Ca2 140.60(4) . 45_435 ?
O1 Al1 Ca2 38.67(16) 45_435 45_435 ?
O1 Al1 Ca2 63.51(18) 14 45_435 ?
O1 Al1 Ca2 100.76(13) 32_534 45_435 ?
Ca1 Al1 Ca2 10.62(15) 45_435 45_435 ?
Ca1 Al1 Ca2 62.52(13) 31_536 45_435 ?
Ca1 Al1 Ca2 74.76(6) 14 45_435 ?
Ca2 Al1 Ca2 99.67(17) 9_645 45_435 ?
Ca2 Al1 Ca2 154.4(4) . 45_435 ?
Ca2 Al1 Ca2 129.7(2) 17_546 45_435 ?
O2 Al1 Ca2 140.60(4) . 31_536 ?
O1 Al1 Ca2 63.51(18) 45_435 31_536 ?
O1 Al1 Ca2 100.76(13) 14 31_536 ?
O1 Al1 Ca2 38.67(16) 32_534 31_536 ?
Ca1 Al1 Ca2 74.76(6) 45_435 31_536 ?
Ca1 Al1 Ca2 10.62(15) 31_536 31_536 ?
Ca1 Al1 Ca2 62.52(13) 14 31_536 ?
Ca2 Al1 Ca2 129.7(2) 9_645 31_536 ?
Ca2 Al1 Ca2 99.67(17) . 31_536 ?
Ca2 Al1 Ca2 154.4(4) 17_546 31_536 ?
Ca2 Al1 Ca2 66.70(6) 45_435 31_536 ?
O1 Al2 O1 111.79(10) 7_536 3_745 ?
O1 Al2 O1 104.92(19) 7_536 5_656 ?
O1 Al2 O1 111.79(10) 3_745 5_656 ?
O1 Al2 O1 111.79(10) 7_536 . ?
O1 Al2 O1 104.92(19) 3_745 . ?
O1 Al2 O1 111.79(10) 5_656 . ?
O1 Al2 Ca1 52.46(9) 7_536 13_546 ?
O1 Al2 Ca1 127.54(9) 3_745 13_546 ?
O1 Al2 Ca1 52.46(9) 5_656 13_546 ?
O1 Al2 Ca1 127.54(9) . 13_546 ?
O1 Al2 Ca1 127.54(9) 7_536 9_645 ?
O1 Al2 Ca1 52.46(9) 3_745 9_645 ?
O1 Al2 Ca1 127.54(9) 5_656 9_645 ?
O1 Al2 Ca1 52.46(9) . 9_645 ?
Ca1 Al2 Ca1 180.0 13_546 9_645 ?
O1 Al2 Ca2 42.59(19) 7_536 7_536 ?
O1 Al2 Ca2 143.6(2) 3_745 7_536 ?
O1 Al2 Ca2 101.48(16) 5_656 7_536 ?
O1 Al2 Ca2 74.46(14) . 7_536 ?
Ca1 Al2 Ca2 63.844(18) 13_546 7_536 ?
Ca1 Al2 Ca2 116.156(18) 9_645 7_536 ?
O1 Al2 Ca2 143.6(2) 7_536 . ?
O1 Al2 Ca2 101.48(16) 3_745 . ?
O1 Al2 Ca2 74.46(14) 5_656 . ?
O1 Al2 Ca2 42.59(19) . . ?
Ca1 Al2 Ca2 116.156(18) 13_546 . ?
Ca1 Al2 Ca2 63.844(18) 9_645 . ?
Ca2 Al2 Ca2 101.205(13) 7_536 . ?
O1 Al2 Ca2 101.48(16) 7_536 5_656 ?
O1 Al2 Ca2 74.46(14) 3_745 5_656 ?
O1 Al2 Ca2 42.59(19) 5_656 5_656 ?
O1 Al2 Ca2 143.6(2) . 5_656 ?
Ca1 Al2 Ca2 63.844(18) 13_546 5_656 ?
Ca1 Al2 Ca2 116.156(18) 9_645 5_656 ?
Ca2 Al2 Ca2 127.69(4) 7_536 5_656 ?
Ca2 Al2 Ca2 101.205(14) . 5_656 ?
O1 Al2 Ca2 74.46(14) 7_536 3_745 ?
O1 Al2 Ca2 42.59(19) 3_745 3_745 ?
O1 Al2 Ca2 143.6(2) 5_656 3_745 ?
O1 Al2 Ca2 101.48(16) . 3_745 ?
Ca1 Al2 Ca2 116.156(18) 13_546 3_745 ?
Ca1 Al2 Ca2 63.844(18) 9_645 3_745 ?
Ca2 Al2 Ca2 101.205(14) 7_536 3_745 ?
Ca2 Al2 Ca2 127.69(4) . 3_745 ?
Ca2 Al2 Ca2 101.205(14) 5_656 3_745 ?
O1 Al2 Ca1 33.28(9) 7_536 7_536 ?
O1 Al2 Ca1 132.75(9) 3_745 7_536 ?
O1 Al2 Ca1 109.18(9) 5_656 7_536 ?
O1 Al2 Ca1 80.14(9) . 7_536 ?
Ca1 Al2 Ca1 65.387(3) 13_546 7_536 ?
Ca1 Al2 Ca1 114.613(4) 9_645 7_536 ?
Ca2 Al2 Ca1 11.7(2) 7_536 7_536 ?
Ca2 Al2 Ca1 111.4(2) . 7_536 ?
Ca2 Al2 Ca1 127.75(7) 5_656 7_536 ?
Ca2 Al2 Ca1 90.16(17) 3_745 7_536 ?
O1 Al2 Ca1 132.75(9) 7_536 . ?
O1 Al2 Ca1 109.18(9) 3_745 . ?
O1 Al2 Ca1 80.14(9) 5_656 . ?
O1 Al2 Ca1 33.28(9) . . ?
Ca1 Al2 Ca1 114.613(3) 13_546 . ?
Ca1 Al2 Ca1 65.387(3) 9_645 . ?
Ca2 Al2 Ca1 90.16(17) 7_536 . ?
Ca2 Al2 Ca1 11.7(2) . . ?
Ca2 Al2 Ca1 111.4(2) 5_656 . ?
Ca2 Al2 Ca1 127.75(7) 3_745 . ?
Ca1 Al2 Ca1 99.989(3) 7_536 . ?
Al1 O2 Ca2 107.7(2) . 9_645 ?
Al1 O2 Ca2 107.7(2) . 17_546 ?
Ca2 O2 Ca2 111.2(2) 9_645 17_546 ?
Al1 O2 Ca2 107.7(2) . . ?
Ca2 O2 Ca2 111.2(2) 9_645 . ?
Ca2 O2 Ca2 111.2(2) 17_546 . ?
Al1 O2 Ca1 118.30(9) . 9_645 ?
Ca2 O2 Ca1 17.7(3) 9_645 9_645 ?
Ca2 O2 Ca1 117.0(3) 17_546 9_645 ?
Ca2 O2 Ca1 93.78(13) . 9_645 ?
Al1 O2 Ca1 118.30(9) . 17_546 ?
Ca2 O2 Ca1 93.78(13) 9_645 17_546 ?
Ca2 O2 Ca1 17.7(3) 17_546 17_546 ?
Ca2 O2 Ca1 117.0(3) . 17_546 ?
Ca1 O2 Ca1 99.37(12) 9_645 17_546 ?
Al1 O2 Ca1 118.30(9) . . ?
Ca2 O2 Ca1 117.0(3) 9_645 . ?
Ca2 O2 Ca1 93.78(13) 17_546 . ?
Ca2 O2 Ca1 17.7(3) . . ?
Ca1 O2 Ca1 99.37(12) 9_645 . ?
Ca1 O2 Ca1 99.37(12) 17_546 . ?
Al2 O1 Al1 137.09(17) . 8_534 ?
Al2 O1 Ca1 122.81(13) . . ?
Al1 O1 Ca1 98.11(12) 8_534 . ?
Al2 O1 Ca2 108.4(3) . . ?
Al1 O1 Ca2 114.0(3) 8_534 . ?
Ca1 O1 Ca2 17.7(3) . . ?
Al2 O1 Ca1 94.64(12) . 9_645 ?
Al1 O1 Ca1 91.76(11) 8_534 9_645 ?
Ca1 O1 Ca1 97.76(10) . 9_645 ?
Ca2 O1 Ca1 89.31(17) . 9_645 ?
Ca1 Ca2 O3 161(2) . 11_656 ?
Ca1 Ca2 O3 161(2) . 9_655 ?
O3 Ca2 O3 38(5) 11_656 9_655 ?
Ca1 Ca2 O3 164(2) . 6_655 ?
O3 Ca2 O3 25(3) 11_656 6_655 ?
O3 Ca2 O3 25(3) 9_655 6_655 ?
Ca1 Ca2 O3 164(2) . 31_535 ?
O3 Ca2 O3 25(3) 11_656 31_535 ?
O3 Ca2 O3 25(3) 9_655 31_535 ?
O3 Ca2 O3 32(4) 6_655 31_535 ?
Ca1 Ca2 O2 85.1(3) . . ?
O3 Ca2 O2 77(3) 11_656 . ?
O3 Ca2 O2 113(3) 9_655 . ?
O3 Ca2 O2 100(3) 6_655 . ?
O3 Ca2 O2 90(3) 31_535 . ?
Ca1 Ca2 O2 85.1(3) . 2_556 ?
O3 Ca2 O2 113(3) 11_656 2_556 ?
O3 Ca2 O2 77(3) 9_655 2_556 ?
O3 Ca2 O2 90(3) 6_655 2_556 ?
O3 Ca2 O2 100(3) 31_535 2_556 ?
O2 Ca2 O2 170.2(6) . 2_556 ?
Ca1 Ca2 O1 75.3(3) . . ?
O3 Ca2 O1 107(4) 11_656 . ?
O3 Ca2 O1 101(4) 9_655 . ?
O3 Ca2 O1 120(2) 6_655 . ?
O3 Ca2 O1 89(2) 31_535 . ?
O2 Ca2 O1 80.65(13) . . ?
O2 Ca2 O1 96.83(15) 2_556 . ?
Ca1 Ca2 O1 75.3(3) . 2_556 ?
O3 Ca2 O1 101(4) 11_656 2_556 ?
O3 Ca2 O1 107(4) 9_655 2_556 ?
O3 Ca2 O1 89(2) 6_655 2_556 ?
O3 Ca2 O1 120(2) 31_535 2_556 ?
O2 Ca2 O1 96.83(15) . 2_556 ?
O2 Ca2 O1 80.65(13) 2_556 2_556 ?
O1 Ca2 O1 150.6(6) . 2_556 ?
Ca1 Ca2 Al1 103.9(2) . . ?
O3 Ca2 Al1 57(2) 11_656 . ?
O3 Ca2 Al1 95(2) 9_655 . ?
O3 Ca2 Al1 75(3) 6_655 . ?
O3 Ca2 Al1 78(3) 31_535 . ?
O2 Ca2 Al1 29.76(12) . . ?
O2 Ca2 Al1 155.4(2) 2_556 . ?
O1 Ca2 Al1 107.55(7) . . ?
O1 Ca2 Al1 79.65(6) 2_556 . ?
Ca1 Ca2 Al1 103.9(2) . 2_556 ?
O3 Ca2 Al1 95(2) 11_656 2_556 ?
O3 Ca2 Al1 57(2) 9_655 2_556 ?
O3 Ca2 Al1 78(3) 6_655 2_556 ?
O3 Ca2 Al1 75(3) 31_535 2_556 ?
O2 Ca2 Al1 155.4(2) . 2_556 ?
O2 Ca2 Al1 29.76(12) 2_556 2_556 ?
O1 Ca2 Al1 79.65(6) . 2_556 ?
O1 Ca2 Al1 107.55(7) 2_556 2_556 ?
Al1 Ca2 Al1 152.2(4) . 2_556 ?
Ca1 Ca2 Al2 99.7(2) . 2_556 ?
O3 Ca2 Al2 73(4) 11_656 2_556 ?
O3 Ca2 Al2 89(4) 9_655 2_556 ?
O3 Ca2 Al2 66(2) 6_655 2_556 ?
O3 Ca2 Al2 95(2) 31_535 2_556 ?
O2 Ca2 Al2 83.64(9) . 2_556 ?
O2 Ca2 Al2 98.03(8) 2_556 2_556 ?
O1 Ca2 Al2 163.84(16) . 2_556 ?
O1 Ca2 Al2 28.97(9) 2_556 2_556 ?
Al1 Ca2 Al2 58.19(5) . 2_556 ?
Al1 Ca2 Al2 116.51(14) 2_556 2_556 ?
O3 O3 O3 81(7) 37_545 16_554 ?
O3 O3 O3 49(4) 37_545 28_644 ?
O3 O3 O3 49(4) 16_554 28_644 ?
O3 O3 Ca2 99(10) 37_545 17_545 ?
O3 O3 Ca2 99(10) 16_554 17_545 ?
O3 O3 Ca2 71(2) 28_644 17_545 ?
O3 O3 Ca2 57(9) 37_545 29 ?
O3 O3 Ca2 57(9) 16_554 29 ?
O3 O3 Ca2 74(2) 28_644 29 ?
Ca2 O3 Ca2 145(4) 17_545 29 ?
O3 O3 Ca1 103(10) 37_545 17_545 ?
O3 O3 Ca1 103(10) 16_554 17_545 ?
O3 O3 Ca1 76.2(18) 28_644 17_545 ?
Ca2 O3 Ca1 5.1(7) 17_545 17_545 ?
Ca2 O3 Ca1 150(4) 29 17_545 ?
O3 O3 Ca1 59(9) 37_545 29 ?
O3 O3 Ca1 59(9) 16_554 29 ?
O3 O3 Ca1 77.9(16) 28_644 29 ?
Ca2 O3 Ca1 149(4) 17_545 29 ?
Ca2 O3 Ca1 3.8(5) 29 29 ?
Ca1 O3 Ca1 154(3) 17_545 29 ?
 
loop_
 _geom_torsion_atom_site_label_1
 _geom_torsion_atom_site_label_2
 _geom_torsion_atom_site_label_3
 _geom_torsion_atom_site_label_4
 _geom_torsion
 _geom_torsion_site_symmetry_1
 _geom_torsion_site_symmetry_2
 _geom_torsion_site_symmetry_3
 _geom_torsion_site_symmetry_4
 _geom_torsion_publ_flag
Ca2 Ca1 Al2 O1 -161.04(13) . . . 7_536 ?
O1 Ca1 Al2 O1 -126.9(2) 2_556 . . 7_536 ?
O1 Ca1 Al2 O1 60.8(3) . . . 7_536 ?
O2 Ca1 Al2 O1 123.57(15) . . . 7_536 ?
O2 Ca1 Al2 O1 -80.51(13) 2_556 . . 7_536 ?
O1 Ca1 Al2 O1 46.01(13) 17_546 . . 7_536 ?
O1 Ca1 Al2 O1 -15.04(16) 44_455 . . 7_536 ?
O3 Ca1 Al2 O1 -174(2) 11_656 . . 7_536 ?
O3 Ca1 Al2 O1 -147(2) 9_655 . . 7_536 ?
O3 Ca1 Al2 O1 -156(2) 6_655 . . 7_536 ?
O3 Ca1 Al2 O1 -167(3) 31_535 . . 7_536 ?
Al1 Ca1 Al2 O1 51.88(13) 8_534 . . 7_536 ?
Ca2 Ca1 Al2 O1 50.01(10) . . . 3_745 ?
O1 Ca1 Al2 O1 84.19(15) 2_556 . . 3_745 ?
O1 Ca1 Al2 O1 -88.1(3) . . . 3_745 ?
O2 Ca1 Al2 O1 -25.39(13) . . . 3_745 ?
O2 Ca1 Al2 O1 130.54(10) 2_556 . . 3_745 ?
O1 Ca1 Al2 O1 -102.94(14) 17_546 . . 3_745 ?
O1 Ca1 Al2 O1 -164.00(11) 44_455 . . 3_745 ?
O3 Ca1 Al2 O1 37(2) 11_656 . . 3_745 ?
O3 Ca1 Al2 O1 64(2) 9_655 . . 3_745 ?
O3 Ca1 Al2 O1 55(2) 6_655 . . 3_745 ?
O3 Ca1 Al2 O1 44(3) 31_535 . . 3_745 ?
Al1 Ca1 Al2 O1 -97.07(10) 8_534 . . 3_745 ?
Ca2 Ca1 Al2 O1 -59.78(9) . . . 5_656 ?
O1 Ca1 Al2 O1 -25.59(12) 2_556 . . 5_656 ?
O1 Ca1 Al2 O1 162.11(14) . . . 5_656 ?
O2 Ca1 Al2 O1 -135.17(12) . . . 5_656 ?
O2 Ca1 Al2 O1 20.76(9) 2_556 . . 5_656 ?
O1 Ca1 Al2 O1 147.27(13) 17_546 . . 5_656 ?
O1 Ca1 Al2 O1 86.22(9) 44_455 . . 5_656 ?
O3 Ca1 Al2 O1 -73(2) 11_656 . . 5_656 ?
O3 Ca1 Al2 O1 -46(2) 9_655 . . 5_656 ?
O3 Ca1 Al2 O1 -54(2) 6_655 . . 5_656 ?
O3 Ca1 Al2 O1 -66(3) 31_535 . . 5_656 ?
Al1 Ca1 Al2 O1 153.14(9) 8_534 . . 5_656 ?
Ca2 Ca1 Al2 O1 138.11(17) . . . . ?
O1 Ca1 Al2 O1 172.3(2) 2_556 . . . ?
O2 Ca1 Al2 O1 62.72(19) . . . . ?
O2 Ca1 Al2 O1 -141.35(18) 2_556 . . . ?
O1 Ca1 Al2 O1 -14.84(18) 17_546 . . . ?
O1 Ca1 Al2 O1 -75.89(18) 44_455 . . . ?
O3 Ca1 Al2 O1 125(2) 11_656 . . . ?
O3 Ca1 Al2 O1 152(2) 9_655 . . . ?
O3 Ca1 Al2 O1 144(2) 6_655 . . . ?
O3 Ca1 Al2 O1 132(3) 31_535 . . . ?
Al1 Ca1 Al2 O1 -8.97(17) 8_534 . . . ?
Ca2 Ca1 Al2 Ca1 -100.323(9) . . . 13_546 ?
O1 Ca1 Al2 Ca1 -66.14(14) 2_556 . . 13_546 ?
O1 Ca1 Al2 Ca1 121.56(17) . . . 13_546 ?
O2 Ca1 Al2 Ca1 -175.72(8) . . . 13_546 ?
O2 Ca1 Al2 Ca1 -19.79(4) 2_556 . . 13_546 ?
O1 Ca1 Al2 Ca1 106.73(6) 17_546 . . 13_546 ?
O1 Ca1 Al2 Ca1 45.67(8) 44_455 . . 13_546 ?
O3 Ca1 Al2 Ca1 -113(2) 11_656 . . 13_546 ?
O3 Ca1 Al2 Ca1 -86(2) 9_655 . . 13_546 ?
O3 Ca1 Al2 Ca1 -95(2) 6_655 . . 13_546 ?
O3 Ca1 Al2 Ca1 -107(3) 31_535 . . 13_546 ?
Al1 Ca1 Al2 Ca1 112.59(3) 8_534 . . 13_546 ?
Ca2 Ca1 Al2 Ca1 79.677(9) . . . 9_645 ?
O1 Ca1 Al2 Ca1 113.86(14) 2_556 . . 9_645 ?
O1 Ca1 Al2 Ca1 -58.44(17) . . . 9_645 ?
O2 Ca1 Al2 Ca1 4.28(8) . . . 9_645 ?
O2 Ca1 Al2 Ca1 160.21(4) 2_556 . . 9_645 ?
O1 Ca1 Al2 Ca1 -73.27(6) 17_546 . . 9_645 ?
O1 Ca1 Al2 Ca1 -134.33(8) 44_455 . . 9_645 ?
O3 Ca1 Al2 Ca1 67(2) 11_656 . . 9_645 ?
O3 Ca1 Al2 Ca1 94(2) 9_655 . . 9_645 ?
O3 Ca1 Al2 Ca1 85(2) 6_655 . . 9_645 ?
O3 Ca1 Al2 Ca1 73(3) 31_535 . . 9_645 ?
Al1 Ca1 Al2 Ca1 -67.41(3) 8_534 . . 9_645 ?
Ca2 Ca1 Al2 Ca2 -161.40(11) . . . 7_536 ?
O1 Ca1 Al2 Ca2 -127.22(19) 2_556 . . 7_536 ?
O1 Ca1 Al2 Ca2 60.5(2) . . . 7_536 ?
O2 Ca1 Al2 Ca2 123.20(13) . . . 7_536 ?
O2 Ca1 Al2 Ca2 -80.87(13) 2_556 . . 7_536 ?
O1 Ca1 Al2 Ca2 45.65(12) 17_546 . . 7_536 ?
O1 Ca1 Al2 Ca2 -15.41(14) 44_455 . . 7_536 ?
O3 Ca1 Al2 Ca2 -174(2) 11_656 . . 7_536 ?
O3 Ca1 Al2 Ca2 -147(2) 9_655 . . 7_536 ?
O3 Ca1 Al2 Ca2 -156(2) 6_655 . . 7_536 ?
O3 Ca1 Al2 Ca2 -168(3) 31_535 . . 7_536 ?
Al1 Ca1 Al2 Ca2 51.52(11) 8_534 . . 7_536 ?
O1 Ca1 Al2 Ca2 34.18(14) 2_556 . . . ?
O1 Ca1 Al2 Ca2 -138.11(17) . . . . ?
O2 Ca1 Al2 Ca2 -75.40(8) . . . . ?
O2 Ca1 Al2 Ca2 80.53(3) 2_556 . . . ?
O1 Ca1 Al2 Ca2 -152.95(6) 17_546 . . . ?
O1 Ca1 Al2 Ca2 145.99(8) 44_455 . . . ?
O3 Ca1 Al2 Ca2 -13(2) 11_656 . . . ?
O3 Ca1 Al2 Ca2 14(2) 9_655 . . . ?
O3 Ca1 Al2 Ca2 5(2) 6_655 . . . ?
O3 Ca1 Al2 Ca2 -6(3) 31_535 . . . ?
Al1 Ca1 Al2 Ca2 -147.08(3) 8_534 . . . ?
Ca2 Ca1 Al2 Ca2 -30.29(5) . . . 5_656 ?
O1 Ca1 Al2 Ca2 3.90(16) 2_556 . . 5_656 ?
O1 Ca1 Al2 Ca2 -168.40(17) . . . 5_656 ?
O2 Ca1 Al2 Ca2 -105.68(9) . . . 5_656 ?
O2 Ca1 Al2 Ca2 50.25(7) 2_556 . . 5_656 ?
O1 Ca1 Al2 Ca2 176.76(8) 17_546 . . 5_656 ?
O1 Ca1 Al2 Ca2 115.71(10) 44_455 . . 5_656 ?
O3 Ca1 Al2 Ca2 -43(2) 11_656 . . 5_656 ?
O3 Ca1 Al2 Ca2 -16(2) 9_655 . . 5_656 ?
O3 Ca1 Al2 Ca2 -25(2) 6_655 . . 5_656 ?
O3 Ca1 Al2 Ca2 -37(3) 31_535 . . 5_656 ?
Al1 Ca1 Al2 Ca2 -177.37(6) 8_534 . . 5_656 ?
Ca2 Ca1 Al2 Ca2 94.2(2) . . . 3_745 ?
O1 Ca1 Al2 Ca2 128.4(3) 2_556 . . 3_745 ?
O1 Ca1 Al2 Ca2 -43.9(3) . . . 3_745 ?
O2 Ca1 Al2 Ca2 18.8(2) . . . 3_745 ?
O2 Ca1 Al2 Ca2 174.8(3) 2_556 . . 3_745 ?
O1 Ca1 Al2 Ca2 -58.7(2) 17_546 . . 3_745 ?
O1 Ca1 Al2 Ca2 -119.8(3) 44_455 . . 3_745 ?
O3 Ca1 Al2 Ca2 81(2) 11_656 . . 3_745 ?
O3 Ca1 Al2 Ca2 108(2) 9_655 . . 3_745 ?
O3 Ca1 Al2 Ca2 100(2) 6_655 . . 3_745 ?
O3 Ca1 Al2 Ca2 88(3) 31_535 . . 3_745 ?
Al1 Ca1 Al2 Ca2 -52.8(2) 8_534 . . 3_745 ?
Ca2 Ca1 Al2 Ca1 -167.712(11) . . . 7_536 ?
O1 Ca1 Al2 Ca1 -133.53(14) 2_556 . . 7_536 ?
O1 Ca1 Al2 Ca1 54.17(17) . . . 7_536 ?
O2 Ca1 Al2 Ca1 116.89(8) . . . 7_536 ?
O2 Ca1 Al2 Ca1 -87.18(4) 2_556 . . 7_536 ?
O1 Ca1 Al2 Ca1 39.34(6) 17_546 . . 7_536 ?
O1 Ca1 Al2 Ca1 -21.72(8) 44_455 . . 7_536 ?
O3 Ca1 Al2 Ca1 179(2) 11_656 . . 7_536 ?
O3 Ca1 Al2 Ca1 -154(2) 9_655 . . 7_536 ?
O3 Ca1 Al2 Ca1 -162(2) 6_655 . . 7_536 ?
O3 Ca1 Al2 Ca1 -174(3) 31_535 . . 7_536 ?
Al1 Ca1 Al2 Ca1 45.21(3) 8_534 . . 7_536 ?
O1 Al1 O2 Ca2 19.3(3) 45_435 . . 9_645 ?
O1 Al1 O2 Ca2 -100.7(3) 14 . . 9_645 ?
O1 Al1 O2 Ca2 139.3(3) 32_534 . . 9_645 ?
Ca1 Al1 O2 Ca2 -36.2(3) 45_435 . . 9_645 ?
Ca1 Al1 O2 Ca2 83.8(3) 31_536 . . 9_645 ?
Ca1 Al1 O2 Ca2 -156.2(3) 14 . . 9_645 ?
Ca2 Al1 O2 Ca2 120.0 . . . 9_645 ?
Ca2 Al1 O2 Ca2 -120.000(1) 17_546 . . 9_645 ?
Ca2 Al1 O2 Ca2 -20.7(5) 45_435 . . 9_645 ?
Ca2 Al1 O2 Ca2 99.3(5) 31_536 . . 9_645 ?
O1 Al1 O2 Ca2 139.3(3) 45_435 . . 17_546 ?
O1 Al1 O2 Ca2 19.3(3) 14 . . 17_546 ?
O1 Al1 O2 Ca2 -100.7(3) 32_534 . . 17_546 ?
Ca1 Al1 O2 Ca2 83.8(3) 45_435 . . 17_546 ?
Ca1 Al1 O2 Ca2 -156.2(3) 31_536 . . 17_546 ?
Ca1 Al1 O2 Ca2 -36.2(3) 14 . . 17_546 ?
Ca2 Al1 O2 Ca2 120.0 9_645 . . 17_546 ?
Ca2 Al1 O2 Ca2 -120.0 . . . 17_546 ?
Ca2 Al1 O2 Ca2 99.3(5) 45_435 . . 17_546 ?
Ca2 Al1 O2 Ca2 -140.7(5) 31_536 . . 17_546 ?
O1 Al1 O2 Ca2 -100.7(3) 45_435 . . . ?
O1 Al1 O2 Ca2 139.3(3) 14 . . . ?
O1 Al1 O2 Ca2 19.3(3) 32_534 . . . ?
Ca1 Al1 O2 Ca2 -156.2(3) 45_435 . . . ?
Ca1 Al1 O2 Ca2 -36.2(3) 31_536 . . . ?
Ca1 Al1 O2 Ca2 83.8(3) 14 . . . ?
Ca2 Al1 O2 Ca2 -120.0 9_645 . . . ?
Ca2 Al1 O2 Ca2 120.0 17_546 . . . ?
Ca2 Al1 O2 Ca2 -140.7(5) 45_435 . . . ?
Ca2 Al1 O2 Ca2 -20.7(5) 31_536 . . . ?
O1 Al1 O2 Ca1 3.85(10) 45_435 . . 9_645 ?
O1 Al1 O2 Ca1 -116.15(10) 14 . . 9_645 ?
O1 Al1 O2 Ca1 123.85(10) 32_534 . . 9_645 ?
Ca1 Al1 O2 Ca1 -51.72(6) 45_435 . . 9_645 ?
Ca1 Al1 O2 Ca1 68.28(6) 31_536 . . 9_645 ?
Ca1 Al1 O2 Ca1 -171.72(6) 14 . . 9_645 ?
Ca2 Al1 O2 Ca1 -15.5(2) 9_645 . . 9_645 ?
Ca2 Al1 O2 Ca1 104.5(2) . . . 9_645 ?
Ca2 Al1 O2 Ca1 -135.5(2) 17_546 . . 9_645 ?
Ca2 Al1 O2 Ca1 -36.2(3) 45_435 . . 9_645 ?
Ca2 Al1 O2 Ca1 83.8(3) 31_536 . . 9_645 ?
O1 Al1 O2 Ca1 123.85(10) 45_435 . . 17_546 ?
O1 Al1 O2 Ca1 3.85(10) 14 . . 17_546 ?
O1 Al1 O2 Ca1 -116.15(10) 32_534 . . 17_546 ?
Ca1 Al1 O2 Ca1 68.28(6) 45_435 . . 17_546 ?
Ca1 Al1 O2 Ca1 -171.72(6) 31_536 . . 17_546 ?
Ca1 Al1 O2 Ca1 -51.72(6) 14 . . 17_546 ?
Ca2 Al1 O2 Ca1 104.5(2) 9_645 . . 17_546 ?
Ca2 Al1 O2 Ca1 -135.5(2) . . . 17_546 ?
Ca2 Al1 O2 Ca1 -15.5(2) 17_546 . . 17_546 ?
Ca2 Al1 O2 Ca1 83.8(3) 45_435 . . 17_546 ?
Ca2 Al1 O2 Ca1 -156.2(3) 31_536 . . 17_546 ?
O1 Al1 O2 Ca1 -116.15(10) 45_435 . . . ?
O1 Al1 O2 Ca1 123.85(10) 14 . . . ?
O1 Al1 O2 Ca1 3.85(10) 32_534 . . . ?
Ca1 Al1 O2 Ca1 -171.72(6) 45_435 . . . ?
Ca1 Al1 O2 Ca1 -51.72(6) 31_536 . . . ?
Ca1 Al1 O2 Ca1 68.28(6) 14 . . . ?
Ca2 Al1 O2 Ca1 -135.5(2) 9_645 . . . ?
Ca2 Al1 O2 Ca1 -15.5(2) . . . . ?
Ca2 Al1 O2 Ca1 104.5(2) 17_546 . . . ?
Ca2 Al1 O2 Ca1 -156.2(3) 45_435 . . . ?
Ca2 Al1 O2 Ca1 -36.2(3) 31_536 . . . ?
Ca2 Ca1 O2 Al1 56.63(2) . . . . ?
O1 Ca1 O2 Al1 -28.56(9) 2_556 . . . ?
O1 Ca1 O2 Al1 145.57(7) . . . . ?
O2 Ca1 O2 Al1 56.63(2) 2_556 . . . ?
O1 Ca1 O2 Al1 -144.55(6) 17_546 . . . ?
O1 Ca1 O2 Al1 -97.48(10) 44_455 . . . ?
O3 Ca1 O2 Al1 52(3) 11_656 . . . ?
O3 Ca1 O2 Al1 61(3) 9_655 . . . ?
O3 Ca1 O2 Al1 45.0(18) 6_655 . . . ?
O3 Ca1 O2 Al1 68.6(18) 31_535 . . . ?
Al1 Ca1 O2 Al1 180.0 8_534 . . . ?
Ca2 Ca1 O2 Ca2 -74.82(10) . . . 9_645 ?
O1 Ca1 O2 Ca2 -160.02(14) 2_556 . . 9_645 ?
O1 Ca1 O2 Ca2 14.12(13) . . . 9_645 ?
O2 Ca1 O2 Ca2 -74.82(11) 2_556 . . 9_645 ?
O1 Ca1 O2 Ca2 84.00(15) 17_546 . . 9_645 ?
O1 Ca1 O2 Ca2 131.06(10) 44_455 . . 9_645 ?
O3 Ca1 O2 Ca2 -80(3) 11_656 . . 9_645 ?
O3 Ca1 O2 Ca2 -70(3) 9_655 . . 9_645 ?
O3 Ca1 O2 Ca2 -86.4(18) 6_655 . . 9_645 ?
O3 Ca1 O2 Ca2 -62.9(18) 31_535 . . 9_645 ?
Al1 Ca1 O2 Ca2 48.55(12) 8_534 . . 9_645 ?
Ca2 Ca1 O2 Ca2 169.1(3) . . . 17_546 ?
O1 Ca1 O2 Ca2 83.9(3) 2_556 . . 17_546 ?
O1 Ca1 O2 Ca2 -102.0(3) . . . 17_546 ?
O2 Ca1 O2 Ca2 169.1(3) 2_556 . . 17_546 ?
O1 Ca1 O2 Ca2 -32.1(3) 17_546 . . 17_546 ?
O1 Ca1 O2 Ca2 15.0(3) 44_455 . . 17_546 ?
O3 Ca1 O2 Ca2 164(3) 11_656 . . 17_546 ?
O3 Ca1 O2 Ca2 173(3) 9_655 . . 17_546 ?
O3 Ca1 O2 Ca2 157.5(18) 6_655 . . 17_546 ?
O3 Ca1 O2 Ca2 -179.0(18) 31_535 . . 17_546 ?
Al1 Ca1 O2 Ca2 -67.6(3) 8_534 . . 17_546 ?
O1 Ca1 O2 Ca2 -85.20(8) 2_556 . . . ?
O1 Ca1 O2 Ca2 88.94(7) . . . . ?
O2 Ca1 O2 Ca2 0.000(2) 2_556 . . . ?
O1 Ca1 O2 Ca2 158.82(7) 17_546 . . . ?
O1 Ca1 O2 Ca2 -154.12(9) 44_455 . . . ?
O3 Ca1 O2 Ca2 -5(3) 11_656 . . . ?
O3 Ca1 O2 Ca2 4(3) 9_655 . . . ?
O3 Ca1 O2 Ca2 -11.6(18) 6_655 . . . ?
O3 Ca1 O2 Ca2 12.0(18) 31_535 . . . ?
Al1 Ca1 O2 Ca2 123.37(2) 8_534 . . . ?
Ca2 Ca1 O2 Ca1 -72.76(7) . . . 9_645 ?
O1 Ca1 O2 Ca1 -157.96(11) 2_556 . . 9_645 ?
O1 Ca1 O2 Ca1 16.18(10) . . . 9_645 ?
O2 Ca1 O2 Ca1 -72.76(7) 2_556 . . 9_645 ?
O1 Ca1 O2 Ca1 86.06(11) 17_546 . . 9_645 ?
O1 Ca1 O2 Ca1 133.12(8) 44_455 . . 9_645 ?
O3 Ca1 O2 Ca1 -78(3) 11_656 . . 9_645 ?
O3 Ca1 O2 Ca1 -68(3) 9_655 . . 9_645 ?
O3 Ca1 O2 Ca1 -84.4(18) 6_655 . . 9_645 ?
O3 Ca1 O2 Ca1 -60.8(18) 31_535 . . 9_645 ?
Al1 Ca1 O2 Ca1 50.60(8) 8_534 . . 9_645 ?
Ca2 Ca1 O2 Ca1 -173.97(10) . . . 17_546 ?
O1 Ca1 O2 Ca1 100.83(13) 2_556 . . 17_546 ?
O1 Ca1 O2 Ca1 -85.03(11) . . . 17_546 ?
O2 Ca1 O2 Ca1 -173.97(10) 2_556 . . 17_546 ?
O1 Ca1 O2 Ca1 -15.15(9) 17_546 . . 17_546 ?
O1 Ca1 O2 Ca1 31.91(17) 44_455 . . 17_546 ?
O3 Ca1 O2 Ca1 -179(3) 11_656 . . 17_546 ?
O3 Ca1 O2 Ca1 -170(3) 9_655 . . 17_546 ?
O3 Ca1 O2 Ca1 174.4(18) 6_655 . . 17_546 ?
O3 Ca1 O2 Ca1 -162.0(18) 31_535 . . 17_546 ?
Al1 Ca1 O2 Ca1 -50.60(8) 8_534 . . 17_546 ?
O1 Al2 O1 Al1 23.7(2) 7_536 . . 8_534 ?
O1 Al2 O1 Al1 -97.6(3) 3_745 . . 8_534 ?
O1 Al2 O1 Al1 141.0(3) 5_656 . . 8_534 ?
Ca1 Al2 O1 Al1 82.4(3) 13_546 . . 8_534 ?
Ca1 Al2 O1 Al1 -97.6(3) 9_645 . . 8_534 ?
Ca2 Al2 O1 Al1 44.6(3) 7_536 . . 8_534 ?
Ca2 Al2 O1 Al1 171.6(4) . . . 8_534 ?
Ca2 Al2 O1 Al1 178.46(19) 5_656 . . 8_534 ?
Ca2 Al2 O1 Al1 -53.9(3) 3_745 . . 8_534 ?
Ca1 Al2 O1 Al1 34.2(2) 7_536 . . 8_534 ?
Ca1 Al2 O1 Al1 160.1(4) . . . 8_534 ?
O1 Al2 O1 Ca1 -136.3(2) 7_536 . . . ?
O1 Al2 O1 Ca1 102.33(18) 3_745 . . . ?
O1 Al2 O1 Ca1 -19.02(14) 5_656 . . . ?
Ca1 Al2 O1 Ca1 -77.67(18) 13_546 . . . ?
Ca1 Al2 O1 Ca1 102.33(18) 9_645 . . . ?
Ca2 Al2 O1 Ca1 -115.4(2) 7_536 . . . ?
Ca2 Al2 O1 Ca1 11.50(16) . . . . ?
Ca2 Al2 O1 Ca1 18.4(3) 5_656 . . . ?
Ca2 Al2 O1 Ca1 146.00(19) 3_745 . . . ?
Ca1 Al2 O1 Ca1 -125.86(15) 7_536 . . . ?
O1 Al2 O1 Ca2 -147.8(2) 7_536 . . . ?
O1 Al2 O1 Ca2 90.8(2) 3_745 . . . ?
O1 Al2 O1 Ca2 -30.53(19) 5_656 . . . ?
Ca1 Al2 O1 Ca2 -89.2(2) 13_546 . . . ?
Ca1 Al2 O1 Ca2 90.8(2) 9_645 . . . ?
Ca2 Al2 O1 Ca2 -126.92(12) 7_536 . . . ?
Ca2 Al2 O1 Ca2 6.9(2) 5_656 . . . ?
Ca2 Al2 O1 Ca2 134.50(9) 3_745 . . . ?
Ca1 Al2 O1 Ca2 -137.4(2) 7_536 . . . ?
Ca1 Al2 O1 Ca2 -11.50(16) . . . . ?
O1 Al2 O1 Ca1 121.35(5) 7_536 . . 9_645 ?
O1 Al2 O1 Ca1 0.0 3_745 . . 9_645 ?
O1 Al2 O1 Ca1 -121.35(5) 5_656 . . 9_645 ?
Ca1 Al2 O1 Ca1 180.0 13_546 . . 9_645 ?
Ca2 Al2 O1 Ca1 142.3(2) 7_536 . . 9_645 ?
Ca2 Al2 O1 Ca1 -90.8(2) . . . 9_645 ?
Ca2 Al2 O1 Ca1 -83.9(2) 5_656 . . 9_645 ?
Ca2 Al2 O1 Ca1 43.67(18) 3_745 . . 9_645 ?
Ca1 Al2 O1 Ca1 131.81(8) 7_536 . . 9_645 ?
Ca1 Al2 O1 Ca1 -102.33(18) . . . 9_645 ?
Ca2 Ca1 O1 Al2 -38.51(15) . . . . ?
O1 Ca1 O1 Al2 -38.51(15) 2_556 . . . ?
O2 Ca1 O1 Al2 -115.99(17) . . . . ?
O2 Ca1 O1 Al2 38.14(18) 2_556 . . . ?
O1 Ca1 O1 Al2 164.04(19) 17_546 . . . ?
O1 Ca1 O1 Al2 117.90(16) 44_455 . . . ?
O3 Ca1 O1 Al2 -52.1(19) 11_656 . . . ?
O3 Ca1 O1 Al2 -24.8(18) 9_655 . . . ?
O3 Ca1 O1 Al2 -36(3) 6_655 . . . ?
O3 Ca1 O1 Al2 -41(3) 31_535 . . . ?
Al1 Ca1 O1 Al2 166.4(3) 8_534 . . . ?
Ca2 Ca1 O1 Al1 155.06(11) . . . 8_534 ?
O1 Ca1 O1 Al1 155.06(11) 2_556 . . 8_534 ?
O2 Ca1 O1 Al1 77.58(12) . . . 8_534 ?
O2 Ca1 O1 Al1 -128.29(11) 2_556 . . 8_534 ?
O1 Ca1 O1 Al1 -2.39(11) 17_546 . . 8_534 ?
O1 Ca1 O1 Al1 -48.53(14) 44_455 . . 8_534 ?
O3 Ca1 O1 Al1 141.5(18) 11_656 . . 8_534 ?
O3 Ca1 O1 Al1 168.7(19) 9_655 . . 8_534 ?
O3 Ca1 O1 Al1 157(3) 6_655 . . 8_534 ?
O3 Ca1 O1 Al1 153(3) 31_535 . . 8_534 ?
O1 Ca1 O1 Ca2 0.0 2_556 . . . ?
O2 Ca1 O1 Ca2 -77.48(6) . . . . ?
O2 Ca1 O1 Ca2 76.65(6) 2_556 . . . ?
O1 Ca1 O1 Ca2 -157.45(7) 17_546 . . . ?
O1 Ca1 O1 Ca2 156.40(7) 44_455 . . . ?
O3 Ca1 O1 Ca2 -13.6(19) 11_656 . . . ?
O3 Ca1 O1 Ca2 13.7(18) 9_655 . . . ?
O3 Ca1 O1 Ca2 2(3) 6_655 . . . ?
O3 Ca1 O1 Ca2 -2(3) 31_535 . . . ?
Al1 Ca1 O1 Ca2 -155.06(11) 8_534 . . . ?
Ca2 Ca1 O1 Ca1 62.16(7) . . . 9_645 ?
O1 Ca1 O1 Ca1 62.16(7) 2_556 . . 9_645 ?
O2 Ca1 O1 Ca1 -15.32(8) . . . 9_645 ?
O2 Ca1 O1 Ca1 138.80(8) 2_556 . . 9_645 ?
O1 Ca1 O1 Ca1 -95.29(9) 17_546 . . 9_645 ?
O1 Ca1 O1 Ca1 -141.44(9) 44_455 . . 9_645 ?
O3 Ca1 O1 Ca1 48.6(19) 11_656 . . 9_645 ?
O3 Ca1 O1 Ca1 75.8(18) 9_655 . . 9_645 ?
O3 Ca1 O1 Ca1 64(3) 6_655 . . 9_645 ?
O3 Ca1 O1 Ca1 60(3) 31_535 . . 9_645 ?
Al1 Ca1 O1 Ca1 -92.91(12) 8_534 . . 9_645 ?
O1 Ca1 Ca2 O3 80(12) 2_556 . . 11_656 ?
O1 Ca1 Ca2 O3 -100(12) . . . 11_656 ?
O2 Ca1 Ca2 O3 -19(12) . . . 11_656 ?
O2 Ca1 Ca2 O3 161(12) 2_556 . . 11_656 ?
O1 Ca1 Ca2 O3 -59(12) 17_546 . . 11_656 ?
O1 Ca1 Ca2 O3 121(12) 44_455 . . 11_656 ?
O3 Ca1 Ca2 O3 180.00(5) 9_655 . . 11_656 ?
O3 Ca1 Ca2 O3 90.00(4) 6_655 . . 11_656 ?
O3 Ca1 Ca2 O3 -90.00(4) 31_535 . . 11_656 ?
Al1 Ca1 Ca2 O3 -85(12) 8_534 . . 11_656 ?
O1 Ca1 Ca2 O3 -100(12) 2_556 . . 9_655 ?
O1 Ca1 Ca2 O3 80(12) . . . 9_655 ?
O2 Ca1 Ca2 O3 161(12) . . . 9_655 ?
O2 Ca1 Ca2 O3 -19(12) 2_556 . . 9_655 ?
O1 Ca1 Ca2 O3 121(12) 17_546 . . 9_655 ?
O1 Ca1 Ca2 O3 -59(12) 44_455 . . 9_655 ?
O3 Ca1 Ca2 O3 180.00(4) 11_656 . . 9_655 ?
O3 Ca1 Ca2 O3 -90.00(4) 6_655 . . 9_655 ?
O3 Ca1 Ca2 O3 90.00(4) 31_535 . . 9_655 ?
Al1 Ca1 Ca2 O3 95(12) 8_534 . . 9_655 ?
O1 Ca1 Ca2 O3 -10(12) 2_556 . . 6_655 ?
O1 Ca1 Ca2 O3 170(12) . . . 6_655 ?
O2 Ca1 Ca2 O3 -109(12) . . . 6_655 ?
O2 Ca1 Ca2 O3 71(12) 2_556 . . 6_655 ?
O1 Ca1 Ca2 O3 -149(12) 17_546 . . 6_655 ?
O1 Ca1 Ca2 O3 31(12) 44_455 . . 6_655 ?
O3 Ca1 Ca2 O3 -90.000(10) 11_656 . . 6_655 ?
O3 Ca1 Ca2 O3 90.000(10) 9_655 . . 6_655 ?
O3 Ca1 Ca2 O3 180.0 31_535 . . 6_655 ?
Al1 Ca1 Ca2 O3 -175(12) 8_534 . . 6_655 ?
O1 Ca1 Ca2 O3 170(12) 2_556 . . 31_535 ?
O1 Ca1 Ca2 O3 -10(12) . . . 31_535 ?
O2 Ca1 Ca2 O3 71(12) . . . 31_535 ?
O2 Ca1 Ca2 O3 -109(12) 2_556 . . 31_535 ?
O1 Ca1 Ca2 O3 31(12) 17_546 . . 31_535 ?
O1 Ca1 Ca2 O3 -149(12) 44_455 . . 31_535 ?
O3 Ca1 Ca2 O3 90.000(11) 11_656 . . 31_535 ?
O3 Ca1 Ca2 O3 -90.000(10) 9_655 . . 31_535 ?
O3 Ca1 Ca2 O3 180.0 6_655 . . 31_535 ?
Al1 Ca1 Ca2 O3 5(12) 8_534 . . 31_535 ?
O1 Ca1 Ca2 O2 98.40(10) 2_556 . . . ?
O1 Ca1 Ca2 O2 -81.60(10) . . . . ?
O2 Ca1 Ca2 O2 180.0 2_556 . . . ?
O1 Ca1 Ca2 O2 -40.51(14) 17_546 . . . ?
O1 Ca1 Ca2 O2 139.49(14) 44_455 . . . ?
O3 Ca1 Ca2 O2 19(12) 11_656 . . . ?
O3 Ca1 Ca2 O2 -161(12) 9_655 . . . ?
O3 Ca1 Ca2 O2 109(12) 6_655 . . . ?
O3 Ca1 Ca2 O2 -71(12) 31_535 . . . ?
Al1 Ca1 Ca2 O2 -66.11(8) 8_534 . . . ?
O1 Ca1 Ca2 O2 -81.60(10) 2_556 . . 2_556 ?
O1 Ca1 Ca2 O2 98.40(10) . . . 2_556 ?
O2 Ca1 Ca2 O2 180.0 . . . 2_556 ?
O1 Ca1 Ca2 O2 139.49(14) 17_546 . . 2_556 ?
O1 Ca1 Ca2 O2 -40.51(14) 44_455 . . 2_556 ?
O3 Ca1 Ca2 O2 -161(12) 11_656 . . 2_556 ?
O3 Ca1 Ca2 O2 19(12) 9_655 . . 2_556 ?
O3 Ca1 Ca2 O2 -71(12) 6_655 . . 2_556 ?
O3 Ca1 Ca2 O2 109(12) 31_535 . . 2_556 ?
Al1 Ca1 Ca2 O2 113.89(8) 8_534 . . 2_556 ?
O1 Ca1 Ca2 O1 180.0 2_556 . . . ?
O2 Ca1 Ca2 O1 81.60(10) . . . . ?
O2 Ca1 Ca2 O1 -98.40(10) 2_556 . . . ?
O1 Ca1 Ca2 O1 41.09(13) 17_546 . . . ?
O1 Ca1 Ca2 O1 -138.91(13) 44_455 . . . ?
O3 Ca1 Ca2 O1 100(12) 11_656 . . . ?
O3 Ca1 Ca2 O1 -80(12) 9_655 . . . ?
O3 Ca1 Ca2 O1 -170(12) 6_655 . . . ?
O3 Ca1 Ca2 O1 10(12) 31_535 . . . ?
Al1 Ca1 Ca2 O1 15.50(7) 8_534 . . . ?
O1 Ca1 Ca2 O1 180.0 . . . 2_556 ?
O2 Ca1 Ca2 O1 -98.40(10) . . . 2_556 ?
O2 Ca1 Ca2 O1 81.60(10) 2_556 . . 2_556 ?
O1 Ca1 Ca2 O1 -138.91(13) 17_546 . . 2_556 ?
O1 Ca1 Ca2 O1 41.09(13) 44_455 . . 2_556 ?
O3 Ca1 Ca2 O1 -80(12) 11_656 . . 2_556 ?
O3 Ca1 Ca2 O1 100(12) 9_655 . . 2_556 ?
O3 Ca1 Ca2 O1 10(12) 6_655 . . 2_556 ?
O3 Ca1 Ca2 O1 -170(12) 31_535 . . 2_556 ?
Al1 Ca1 Ca2 O1 -164.50(7) 8_534 . . 2_556 ?
O1 Ca1 Ca2 Al1 75.15(7) 2_556 . . . ?
O1 Ca1 Ca2 Al1 -104.85(7) . . . . ?
O2 Ca1 Ca2 Al1 -23.24(8) . . . . ?
O2 Ca1 Ca2 Al1 156.76(8) 2_556 . . . ?
O1 Ca1 Ca2 Al1 -63.75(11) 17_546 . . . ?
O1 Ca1 Ca2 Al1 116.25(11) 44_455 . . . ?
O3 Ca1 Ca2 Al1 -4(12) 11_656 . . . ?
O3 Ca1 Ca2 Al1 176(12) 9_655 . . . ?
O3 Ca1 Ca2 Al1 86(12) 6_655 . . . ?
O3 Ca1 Ca2 Al1 -94(12) 31_535 . . . ?
Al1 Ca1 Ca2 Al1 -89.350(6) 8_534 . . . ?
O1 Ca1 Ca2 Al1 -104.85(7) 2_556 . . 2_556 ?
O1 Ca1 Ca2 Al1 75.15(7) . . . 2_556 ?
O2 Ca1 Ca2 Al1 156.76(8) . . . 2_556 ?
O2 Ca1 Ca2 Al1 -23.24(8) 2_556 . . 2_556 ?
O1 Ca1 Ca2 Al1 116.25(11) 17_546 . . 2_556 ?
O1 Ca1 Ca2 Al1 -63.75(11) 44_455 . . 2_556 ?
O3 Ca1 Ca2 Al1 176(12) 11_656 . . 2_556 ?
O3 Ca1 Ca2 Al1 -4(12) 9_655 . . 2_556 ?
O3 Ca1 Ca2 Al1 -94(12) 6_655 . . 2_556 ?
O3 Ca1 Ca2 Al1 86(12) 31_535 . . 2_556 ?
Al1 Ca1 Ca2 Al1 90.650(6) 8_534 . . 2_556 ?
O1 Ca1 Ca2 Al2 15.73(6) 2_556 . . 2_556 ?
O1 Ca1 Ca2 Al2 -164.27(6) . . . 2_556 ?
O2 Ca1 Ca2 Al2 -82.67(8) . . . 2_556 ?
O2 Ca1 Ca2 Al2 97.33(8) 2_556 . . 2_556 ?
O1 Ca1 Ca2 Al2 -123.18(11) 17_546 . . 2_556 ?
O1 Ca1 Ca2 Al2 56.82(11) 44_455 . . 2_556 ?
O3 Ca1 Ca2 Al2 -64(12) 11_656 . . 2_556 ?
O3 Ca1 Ca2 Al2 116(12) 9_655 . . 2_556 ?
O3 Ca1 Ca2 Al2 26(12) 6_655 . . 2_556 ?
O3 Ca1 Ca2 Al2 -154(12) 31_535 . . 2_556 ?
Al1 Ca1 Ca2 Al2 -148.78(2) 8_534 . . 2_556 ?
Al1 O2 Ca2 Ca1 -129.48(8) . . . . ?
Ca2 O2 Ca2 Ca1 112.7(2) 9_645 . . . ?
Ca2 O2 Ca2 Ca1 -11.7(3) 17_546 . . . ?
Ca1 O2 Ca2 Ca1 109.20(10) 9_645 . . . ?
Ca1 O2 Ca2 Ca1 6.68(11) 17_546 . . . ?
Al1 O2 Ca2 O3 44(4) . . . 11_656 ?
Ca2 O2 Ca2 O3 -73(4) 9_645 . . 11_656 ?
Ca2 O2 Ca2 O3 162(4) 17_546 . . 11_656 ?
Ca1 O2 Ca2 O3 -77(4) 9_645 . . 11_656 ?
Ca1 O2 Ca2 O3 -179(4) 17_546 . . 11_656 ?
Ca1 O2 Ca2 O3 174(4) . . . 11_656 ?
Al1 O2 Ca2 O3 57(4) . . . 9_655 ?
Ca2 O2 Ca2 O3 -61(4) 9_645 . . 9_655 ?
Ca2 O2 Ca2 O3 175(4) 17_546 . . 9_655 ?
Ca1 O2 Ca2 O3 -64(4) 9_645 . . 9_655 ?
Ca1 O2 Ca2 O3 -167(4) 17_546 . . 9_655 ?
Ca1 O2 Ca2 O3 -173(4) . . . 9_655 ?
Al1 O2 Ca2 O3 35(2) . . . 6_655 ?
Ca2 O2 Ca2 O3 -83(2) 9_645 . . 6_655 ?
Ca2 O2 Ca2 O3 153(2) 17_546 . . 6_655 ?
Ca1 O2 Ca2 O3 -86(2) 9_645 . . 6_655 ?
Ca1 O2 Ca2 O3 171(2) 17_546 . . 6_655 ?
Ca1 O2 Ca2 O3 165(2) . . . 6_655 ?
Al1 O2 Ca2 O3 66(2) . . . 31_535 ?
Ca2 O2 Ca2 O3 -52(2) 9_645 . . 31_535 ?
Ca2 O2 Ca2 O3 -177(2) 17_546 . . 31_535 ?
Ca1 O2 Ca2 O3 -56(2) 9_645 . . 31_535 ?
Ca1 O2 Ca2 O3 -158(2) 17_546 . . 31_535 ?
Ca1 O2 Ca2 O3 -165(2) . . . 31_535 ?
Al1 O2 Ca2 O2 -129.48(8) . . . 2_556 ?
Ca2 O2 Ca2 O2 112.7(2) 9_645 . . 2_556 ?
Ca2 O2 Ca2 O2 -11.7(3) 17_546 . . 2_556 ?
Ca1 O2 Ca2 O2 109.20(10) 9_645 . . 2_556 ?
Ca1 O2 Ca2 O2 6.68(11) 17_546 . . 2_556 ?
Ca1 O2 Ca2 O2 0.000(3) . . . 2_556 ?
Al1 O2 Ca2 O1 154.66(18) . . . . ?
Ca2 O2 Ca2 O1 36.9(4) 9_645 . . . ?
Ca2 O2 Ca2 O1 -87.57(17) 17_546 . . . ?
Ca1 O2 Ca2 O1 33.3(3) 9_645 . . . ?
Ca1 O2 Ca2 O1 -69.2(3) 17_546 . . . ?
Ca1 O2 Ca2 O1 -75.9(3) . . . . ?
Al1 O2 Ca2 O1 -55.0(4) . . . 2_556 ?
Ca2 O2 Ca2 O1 -172.7(2) 9_645 . . 2_556 ?
Ca2 O2 Ca2 O1 62.8(7) 17_546 . . 2_556 ?
Ca1 O2 Ca2 O1 -176.3(3) 9_645 . . 2_556 ?
Ca1 O2 Ca2 O1 81.2(3) 17_546 . . 2_556 ?
Ca1 O2 Ca2 O1 74.5(3) . . . 2_556 ?
Ca2 O2 Ca2 Al1 -117.8(3) 9_645 . . . ?
Ca2 O2 Ca2 Al1 117.8(3) 17_546 . . . ?
Ca1 O2 Ca2 Al1 -121.33(13) 9_645 . . . ?
Ca1 O2 Ca2 Al1 136.16(14) 17_546 . . . ?
Ca1 O2 Ca2 Al1 129.48(8) . . . . ?
Al1 O2 Ca2 Al1 117.5(10) . . . 2_556 ?
Ca2 O2 Ca2 Al1 -0.2(13) 9_645 . . 2_556 ?
Ca2 O2 Ca2 Al1 -124.7(8) 17_546 . . 2_556 ?
Ca1 O2 Ca2 Al1 -3.8(11) 9_645 . . 2_556 ?
Ca1 O2 Ca2 Al1 -106.3(11) 17_546 . . 2_556 ?
Ca1 O2 Ca2 Al1 -113.0(11) . . . 2_556 ?
Al1 O2 Ca2 Al2 -29.1(2) . . . 2_556 ?
Ca2 O2 Ca2 Al2 -146.90(14) 9_645 . . 2_556 ?
Ca2 O2 Ca2 Al2 88.7(5) 17_546 . . 2_556 ?
Ca1 O2 Ca2 Al2 -150.45(19) 9_645 . . 2_556 ?
Ca1 O2 Ca2 Al2 107.0(2) 17_546 . . 2_556 ?
Ca1 O2 Ca2 Al2 100.36(18) . . . 2_556 ?
Al2 O1 Ca2 Ca1 146.52(15) . . . . ?
Al1 O1 Ca2 Ca1 -27.19(14) 8_534 . . . ?
Ca1 O1 Ca2 Ca1 -118.81(7) 9_645 . . . ?
Al2 O1 Ca2 O3 -53(3) . . . 11_656 ?
Al1 O1 Ca2 O3 133(3) 8_534 . . 11_656 ?
Ca1 O1 Ca2 O3 160(3) . . . 11_656 ?
Ca1 O1 Ca2 O3 42(3) 9_645 . . 11_656 ?
Al2 O1 Ca2 O3 -15(3) . . . 9_655 ?
Al1 O1 Ca2 O3 172(3) 8_534 . . 9_655 ?
Ca1 O1 Ca2 O3 -161(3) . . . 9_655 ?
Ca1 O1 Ca2 O3 80(3) 9_645 . . 9_655 ?
Al2 O1 Ca2 O3 -30(4) . . . 6_655 ?
Al1 O1 Ca2 O3 156(4) 8_534 . . 6_655 ?
Ca1 O1 Ca2 O3 -177(4) . . . 6_655 ?
Ca1 O1 Ca2 O3 64(4) 9_645 . . 6_655 ?
Al2 O1 Ca2 O3 -36(3) . . . 31_535 ?
Al1 O1 Ca2 O3 150(3) 8_534 . . 31_535 ?
Ca1 O1 Ca2 O3 177(3) . . . 31_535 ?
Ca1 O1 Ca2 O3 58(3) 9_645 . . 31_535 ?
Al2 O1 Ca2 O2 -126.1(2) . . . . ?
Al1 O1 Ca2 O2 60.1(3) 8_534 . . . ?
Ca1 O1 Ca2 O2 87.3(3) . . . . ?
Ca1 O1 Ca2 O2 -31.5(2) 9_645 . . . ?
Al2 O1 Ca2 O2 63.5(4) . . . 2_556 ?
Al1 O1 Ca2 O2 -110.3(3) 8_534 . . 2_556 ?
Ca1 O1 Ca2 O2 -83.1(3) . . . 2_556 ?
Ca1 O1 Ca2 O2 158.1(3) 9_645 . . 2_556 ?
Al2 O1 Ca2 O1 146.52(15) . . . 2_556 ?
Al1 O1 Ca2 O1 -27.19(14) 8_534 . . 2_556 ?
Ca1 O1 Ca2 O1 0.0 . . . 2_556 ?
Ca1 O1 Ca2 O1 -118.81(7) 9_645 . . 2_556 ?
Al2 O1 Ca2 Al1 -113.3(3) . . . . ?
Al1 O1 Ca2 Al1 73.0(4) 8_534 . . . ?
Ca1 O1 Ca2 Al1 100.2(3) . . . . ?
Ca1 O1 Ca2 Al1 -18.6(3) 9_645 . . . ?
Al2 O1 Ca2 Al1 39.1(2) . . . 2_556 ?
Al1 O1 Ca2 Al1 -134.66(17) 8_534 . . 2_556 ?
Ca1 O1 Ca2 Al1 -107.47(15) . . . 2_556 ?
Ca1 O1 Ca2 Al1 133.72(17) 9_645 . . 2_556 ?
Al2 O1 Ca2 Al2 -139.8(16) . . . 2_556 ?
Al1 O1 Ca2 Al2 46.5(18) 8_534 . . 2_556 ?
Ca1 O1 Ca2 Al2 73.7(17) . . . 2_556 ?
Ca1 O1 Ca2 Al2 -45.1(17) 9_645 . . 2_556 ?
O2 Al1 Ca2 Ca1 52.39(18) . . . . ?
O1 Al1 Ca2 Ca1 154.07(12) 45_435 . . . ?
O1 Al1 Ca2 Ca1 -18.99(18) 14 . . . ?
O1 Al1 Ca2 Ca1 -109.86(10) 32_534 . . . ?
Ca1 Al1 Ca2 Ca1 151.1(4) 45_435 . . . ?
Ca1 Al1 Ca2 Ca1 -151.56(2) 31_536 . . . ?
Ca1 Al1 Ca2 Ca1 -76.99(11) 14 . . . ?
Ca2 Al1 Ca2 Ca1 90.47(12) 9_645 . . . ?
Ca2 Al1 Ca2 Ca1 14.3(2) 17_546 . . . ?
Ca2 Al1 Ca2 Ca1 164.1(3) 45_435 . . . ?
Ca2 Al1 Ca2 Ca1 -140.79(14) 31_536 . . . ?
O2 Al1 Ca2 O3 -126(5) . . . 11_656 ?
O1 Al1 Ca2 O3 -24(5) 45_435 . . 11_656 ?
O1 Al1 Ca2 O3 163(5) 14 . . 11_656 ?
O1 Al1 Ca2 O3 72(5) 32_534 . . 11_656 ?
Ca1 Al1 Ca2 O3 -27(5) 45_435 . . 11_656 ?
Ca1 Al1 Ca2 O3 30(5) 31_536 . . 11_656 ?
Ca1 Al1 Ca2 O3 105(5) 14 . . 11_656 ?
Ca2 Al1 Ca2 O3 -88(5) 9_645 . . 11_656 ?
Ca2 Al1 Ca2 O3 -164(5) 17_546 . . 11_656 ?
Ca2 Al1 Ca2 O3 -14(5) 45_435 . . 11_656 ?
Ca2 Al1 Ca2 O3 41(5) 31_536 . . 11_656 ?
O2 Al1 Ca2 O3 -129(4) . . . 9_655 ?
O1 Al1 Ca2 O3 -27(4) 45_435 . . 9_655 ?
O1 Al1 Ca2 O3 160(4) 14 . . 9_655 ?
O1 Al1 Ca2 O3 69(4) 32_534 . . 9_655 ?
Ca1 Al1 Ca2 O3 -30(4) 45_435 . . 9_655 ?
Ca1 Al1 Ca2 O3 27(4) 31_536 . . 9_655 ?
Ca1 Al1 Ca2 O3 102(4) 14 . . 9_655 ?
Ca2 Al1 Ca2 O3 -91(4) 9_645 . . 9_655 ?
Ca2 Al1 Ca2 O3 -167(4) 17_546 . . 9_655 ?
Ca2 Al1 Ca2 O3 -17(4) 45_435 . . 9_655 ?
Ca2 Al1 Ca2 O3 38(4) 31_536 . . 9_655 ?
O2 Al1 Ca2 O3 -144(2) . . . 6_655 ?
O1 Al1 Ca2 O3 -42(2) 45_435 . . 6_655 ?
O1 Al1 Ca2 O3 145(2) 14 . . 6_655 ?
O1 Al1 Ca2 O3 54(2) 32_534 . . 6_655 ?
Ca1 Al1 Ca2 O3 -45(2) 45_435 . . 6_655 ?
Ca1 Al1 Ca2 O3 12(2) 31_536 . . 6_655 ?
Ca1 Al1 Ca2 O3 87(2) 14 . . 6_655 ?
Ca2 Al1 Ca2 O3 -106(2) 9_645 . . 6_655 ?
Ca2 Al1 Ca2 O3 178(2) 17_546 . . 6_655 ?
Ca2 Al1 Ca2 O3 -32(2) 45_435 . . 6_655 ?
Ca2 Al1 Ca2 O3 23(2) 31_536 . . 6_655 ?
O2 Al1 Ca2 O3 -111(2) . . . 31_535 ?
O1 Al1 Ca2 O3 -10(2) 45_435 . . 31_535 ?
O1 Al1 Ca2 O3 177(2) 14 . . 31_535 ?
O1 Al1 Ca2 O3 86(2) 32_534 . . 31_535 ?
Ca1 Al1 Ca2 O3 -13(2) 45_435 . . 31_535 ?
Ca1 Al1 Ca2 O3 45(2) 31_536 . . 31_535 ?
Ca1 Al1 Ca2 O3 119(2) 14 . . 31_535 ?
Ca2 Al1 Ca2 O3 -73(2) 9_645 . . 31_535 ?
Ca2 Al1 Ca2 O3 -149(2) 17_546 . . 31_535 ?
Ca2 Al1 Ca2 O3 0(2) 45_435 . . 31_535 ?
Ca2 Al1 Ca2 O3 55(2) 31_536 . . 31_535 ?
O1 Al1 Ca2 O2 101.7(2) 45_435 . . . ?
O1 Al1 Ca2 O2 -71.38(19) 14 . . . ?
O1 Al1 Ca2 O2 -162.2(2) 32_534 . . . ?
Ca1 Al1 Ca2 O2 98.7(6) 45_435 . . . ?
Ca1 Al1 Ca2 O2 156.05(17) 31_536 . . . ?
Ca1 Al1 Ca2 O2 -129.38(8) 14 . . . ?
Ca2 Al1 Ca2 O2 38.08(6) 9_645 . . . ?
Ca2 Al1 Ca2 O2 -38.08(6) 17_546 . . . ?
Ca2 Al1 Ca2 O2 111.8(4) 45_435 . . . ?
Ca2 Al1 Ca2 O2 166.8(3) 31_536 . . . ?
O2 Al1 Ca2 O2 161.5(13) . . . 2_556 ?
O1 Al1 Ca2 O2 -96.8(11) 45_435 . . 2_556 ?
O1 Al1 Ca2 O2 90.1(12) 14 . . 2_556 ?
O1 Al1 Ca2 O2 -0.7(11) 32_534 . . 2_556 ?
Ca1 Al1 Ca2 O2 -99.8(8) 45_435 . . 2_556 ?
Ca1 Al1 Ca2 O2 -42.4(11) 31_536 . . 2_556 ?
Ca1 Al1 Ca2 O2 32.1(12) 14 . . 2_556 ?
Ca2 Al1 Ca2 O2 -160.4(12) 9_645 . . 2_556 ?
Ca2 Al1 Ca2 O2 123.4(13) 17_546 . . 2_556 ?
Ca2 Al1 Ca2 O2 -86.7(9) 45_435 . . 2_556 ?
Ca2 Al1 Ca2 O2 -31.7(10) 31_536 . . 2_556 ?
O2 Al1 Ca2 O1 -26.29(19) . . . . ?
O1 Al1 Ca2 O1 75.4(4) 45_435 . . . ?
O1 Al1 Ca2 O1 -97.7(3) 14 . . . ?
O1 Al1 Ca2 O1 171.5(4) 32_534 . . . ?
Ca1 Al1 Ca2 O1 72.4(7) 45_435 . . . ?
Ca1 Al1 Ca2 O1 129.8(4) 31_536 . . . ?
Ca1 Al1 Ca2 O1 -155.7(3) 14 . . . ?
Ca2 Al1 Ca2 O1 11.8(2) 9_645 . . . ?
Ca2 Al1 Ca2 O1 -64.37(14) 17_546 . . . ?
Ca2 Al1 Ca2 O1 85.5(6) 45_435 . . . ?
Ca2 Al1 Ca2 O1 140.5(5) 31_536 . . . ?
O2 Al1 Ca2 O1 124.3(4) . . . 2_556 ?
O1 Al1 Ca2 O1 -134.1(3) 45_435 . . 2_556 ?
O1 Al1 Ca2 O1 52.9(4) 14 . . 2_556 ?
O1 Al1 Ca2 O1 -38.0(2) 32_534 . . 2_556 ?
Ca1 Al1 Ca2 O1 -137.0(2) 45_435 . . 2_556 ?
Ca1 Al1 Ca2 O1 -79.7(3) 31_536 . . 2_556 ?
Ca1 Al1 Ca2 O1 -5.1(4) 14 . . 2_556 ?
Ca2 Al1 Ca2 O1 162.3(4) 9_645 . . 2_556 ?
Ca2 Al1 Ca2 O1 86.2(5) 17_546 . . 2_556 ?
Ca2 Al1 Ca2 O1 -123.98(11) 45_435 . . 2_556 ?
Ca2 Al1 Ca2 O1 -68.92(13) 31_536 . . 2_556 ?
O2 Al1 Ca2 Al1 -127.61(18) . . . 2_556 ?
O1 Al1 Ca2 Al1 -25.93(12) 45_435 . . 2_556 ?
O1 Al1 Ca2 Al1 161.01(18) 14 . . 2_556 ?
O1 Al1 Ca2 Al1 70.14(10) 32_534 . . 2_556 ?
Ca1 Al1 Ca2 Al1 -28.9(4) 45_435 . . 2_556 ?
Ca1 Al1 Ca2 Al1 28.44(2) 31_536 . . 2_556 ?
Ca1 Al1 Ca2 Al1 103.01(12) 14 . . 2_556 ?
Ca2 Al1 Ca2 Al1 -89.53(13) 9_645 . . 2_556 ?
Ca2 Al1 Ca2 Al1 -165.7(2) 17_546 . . 2_556 ?
Ca2 Al1 Ca2 Al1 -15.9(3) 45_435 . . 2_556 ?
Ca2 Al1 Ca2 Al1 39.21(14) 31_536 . . 2_556 ?
O2 Al1 Ca2 Al2 145.3(3) . . . 2_556 ?
O1 Al1 Ca2 Al2 -113.01(14) 45_435 . . 2_556 ?
O1 Al1 Ca2 Al2 73.9(3) 14 . . 2_556 ?
O1 Al1 Ca2 Al2 -16.94(11) 32_534 . . 2_556 ?
Ca1 Al1 Ca2 Al2 -116.0(3) 45_435 . . 2_556 ?
Ca1 Al1 Ca2 Al2 -58.65(12) 31_536 . . 2_556 ?
Ca1 Al1 Ca2 Al2 15.9(2) 14 . . 2_556 ?
Ca2 Al1 Ca2 Al2 -176.6(2) 9_645 . . 2_556 ?
Ca2 Al1 Ca2 Al2 107.2(3) 17_546 . . 2_556 ?
Ca2 Al1 Ca2 Al2 -102.94(16) 45_435 . . 2_556 ?
Ca2 Al1 Ca2 Al2 -47.87(3) 31_536 . . 2_556 ?
 
_diffrn_measured_fraction_theta_max    1.000
_diffrn_reflns_theta_full              29.85
_diffrn_measured_fraction_theta_full   1.000
_refine_diff_density_max    0.720
_refine_diff_density_min   -0.779
_refine_diff_density_rms    0.120

#===END
 
data_C12A7_osc_RT
 
_audit_creation_method            SHELXL-97
_chemical_name_systematic
;
 ?
;
_chemical_name_common             Mayenite
_chemical_melting_point           ?
_chemical_formula_moiety          ?
_chemical_formula_sum
 'Al14 Ca12 O33'
_chemical_formula_weight          1386.72
 
loop_
 _atom_type_symbol
 _atom_type_description
 _atom_type_scat_dispersion_real
 _atom_type_scat_dispersion_imag
 _atom_type_scat_source
 'O'  'O'   0.0106   0.0060
 'International Tables Vol C Tables 4.2.6.8 and 6.1.1.4'
 'Al'  'Al'   0.0645   0.0514
 'International Tables Vol C Tables 4.2.6.8 and 6.1.1.4'
 'Ca'  'Ca'   0.2262   0.3064
 'International Tables Vol C Tables 4.2.6.8 and 6.1.1.4'
 
_symmetry_cell_setting            Cubic
_symmetry_space_group_name_H-M   I-43d
 
loop_
 _symmetry_equiv_pos_as_xyz
 'x, y, z'
 'x, -y, -z+1/2'
 '-x, -y+1/2, z'
 '-x, y+1/2, -z+1/2'
 'y+1/4, -x+3/4, -z+1/4'
 '-y+1/4, -x+3/4, z+3/4'
 '-y+3/4, x+3/4, -z+1/4'
 'y+3/4, x+3/4, z+3/4'
 'y, z, x'
 '-y, -z+1/2, x'
 'y, -z, -x+1/2'
 '-y, z+1/2, -x+1/2'
 'z+1/4, -y+3/4, -x+1/4'
 'z+1/4, y+1/4, x+1/4'
 '-z+3/4, y+3/4, -x+1/4'
 '-z+3/4, -y+1/4, x+1/4'
 'z, x, y'
 '-z+1/2, x, -y'
 '-z, -x+1/2, y'
 'z+1/2, -x+1/2, -y'
 'x+3/4, z+3/4, y+3/4'
 'x+3/4, -z+1/4, -y+3/4'
 '-x+3/4, z+3/4, -y+1/4'
 '-x+1/4, -z+3/4, y+3/4'
 'x+1/2, y+1/2, z+1/2'
 'x+1/2, -y+1/2, -z+1'
 '-x+1/2, -y+1, z+1/2'
 '-x+1/2, y+1, -z+1'
 'y+3/4, -x+5/4, -z+3/4'
 '-y+3/4, -x+5/4, z+5/4'
 '-y+5/4, x+5/4, -z+3/4'
 'y+5/4, x+5/4, z+5/4'
 'y+1/2, z+1/2, x+1/2'
 '-y+1/2, -z+1, x+1/2'
 'y+1/2, -z+1/2, -x+1'
 '-y+1/2, z+1, -x+1'
 'z+3/4, -y+5/4, -x+3/4'
 'z+3/4, y+3/4, x+3/4'
 '-z+5/4, y+5/4, -x+3/4'
 '-z+5/4, -y+3/4, x+3/4'
 'z+1/2, x+1/2, y+1/2'
 '-z+1, x+1/2, -y+1/2'
 '-z+1/2, -x+1, y+1/2'
 'z+1, -x+1, -y+1/2'
 'x+5/4, z+5/4, y+5/4'
 'x+5/4, -z+3/4, -y+5/4'
 '-x+5/4, z+5/4, -y+3/4'
 '-x+3/4, -z+5/4, y+5/4'
 
_cell_length_a                    11.9824(5)
_cell_length_b                    11.9824(5)
_cell_length_c                    11.9824(5)
_cell_angle_alpha                 90.00
_cell_angle_beta                  90.00
_cell_angle_gamma                 90.00
_cell_volume                      1720.41(12)
_cell_formula_units_Z             2
_cell_measurement_temperature     293(2)
_cell_measurement_reflns_used     25
_cell_measurement_theta_min       25
_cell_measurement_theta_max       30
 
_exptl_crystal_description        prism
_exptl_crystal_colour             colorless
_exptl_crystal_size_max           0.15
_exptl_crystal_size_mid           0.10
_exptl_crystal_size_min           0.07
_exptl_crystal_density_meas       ?
_exptl_crystal_density_diffrn     2.677
_exptl_crystal_density_method     'not measured'
_exptl_crystal_F_000              1372
_exptl_absorpt_coefficient_mu     2.297
_exptl_absorpt_correction_type    none
_exptl_absorpt_correction_T_min   ?
_exptl_absorpt_correction_T_max   ?
_exptl_absorpt_process_details    ?
 
_exptl_special_details
;
 ?
;
 
_diffrn_ambient_temperature       293(2)
_diffrn_radiation_wavelength      0.71073
_diffrn_radiation_type            MoK\a
_diffrn_radiation_source          'fine-focus sealed tube'
_diffrn_radiation_monochromator   graphite
_diffrn_measurement_device_type   'Nonius CAD-4 diffractometer'
_diffrn_measurement_method        '\w-2\q scan technique'
_diffrn_detector_area_resol_mean  ?
_diffrn_standards_number          3
_diffrn_standards_interval_count  200
_diffrn_standards_interval_time   3600
_diffrn_standards_decay_%         4.57
_diffrn_reflns_number             3868
_diffrn_reflns_av_R_equivalents   0.090
_diffrn_reflns_av_sigmaI/netI     0.051
_diffrn_reflns_limit_h_min        -19
_diffrn_reflns_limit_h_max        19
_diffrn_reflns_limit_k_min        -19
_diffrn_reflns_limit_k_max        19
_diffrn_reflns_limit_l_min        -19
_diffrn_reflns_limit_l_max        19
_diffrn_reflns_theta_min          4.17
_diffrn_reflns_theta_max          34.89
_reflns_number_total              629
_reflns_number_gt                 624
_reflns_threshold_expression      >2sigma(I)
 
_computing_data_collection      'CAD-4 EXPRESS (Enraf-Nonius, 1994)'
_computing_cell_refinement      'CRYSDA (Beurskens et al., 1992)'
_computing_data_reduction       'REFLEX (Garc\'ia-Granda et al., 1999)'
_computing_structure_solution           'DIRDIF (Beurskens et al., 1992)'
_computing_structure_refinement         'SHELXL97 (Sheldrick, 1997b)'
_computing_molecular_graphics           'PLATON (Spek, 1982)'
_computing_publication_material         'SHELXL97'
 
_refine_special_details
;
 Refinement of F^2^ against ALL reflections.  The weighted R-factor wR and
 goodness of fit S are based on F^2^, conventional R-factors R are based
 on F, with F set to zero for negative F^2^. The threshold expression of
 F^2^ > 2sigma(F^2^) is used only for calculating R-factors(gt) etc. and is
 not relevant to the choice of reflections for refinement.  R-factors based
 on F^2^ are statistically about twice as large as those based on F, and R-
 factors based on ALL data will be even larger.
;
 
_refine_ls_structure_factor_coef  Fsqd
_refine_ls_matrix_type            full
_refine_ls_weighting_scheme       calc
_refine_ls_weighting_details
 'calc w=1/[\s^2^(Fo^2^)+(0.0532P)^2^+2.3065P] where P=(Fo^2^+2Fc^2^)/3'
_atom_sites_solution_primary      direct
_atom_sites_solution_secondary    difmap
_atom_sites_solution_hydrogens    ?
_refine_ls_hydrogen_treatment     ?
_refine_ls_extinction_method      none
_refine_ls_extinction_coef        ?
_refine_ls_abs_structure_details
 'Flack H D (1983), Acta Cryst. A39, 876-881'
_refine_ls_abs_structure_Flack    0.01(9)
_refine_ls_number_reflns          629
_refine_ls_number_parameters      30
_refine_ls_number_restraints      0
_refine_ls_R_factor_all           0.0423
_refine_ls_R_factor_gt            0.0420
_refine_ls_wR_factor_ref          0.1180
_refine_ls_wR_factor_gt           0.1175
_refine_ls_goodness_of_fit_ref    1.019
_refine_ls_restrained_S_all       1.019
_refine_ls_shift/su_max           0.000
_refine_ls_shift/su_mean          0.000
 
loop_
 _atom_site_label
 _atom_site_type_symbol
 _atom_site_fract_x
 _atom_site_fract_y
 _atom_site_fract_z
 _atom_site_U_iso_or_equiv
 _atom_site_adp_type
 _atom_site_occupancy
 _atom_site_symmetry_multiplicity
 _atom_site_calc_flag
 _atom_site_refinement_flags
 _atom_site_disorder_assembly
 _atom_site_disorder_group
Ca1 Ca 0.10955(13) 1.0000 0.2500 0.0105(3) Uani 0.810(8) 2 d SP . .
Al1 Al -0.01876(6) 0.98124(6) -0.01876(6) 0.0073(2) Uani 1 3 d S . .
Al2 Al 0.0000 1.2500 0.3750 0.0063(3) Uani 1 4 d S . .
O2 O 0.06428(15) 1.06428(15) 0.06428(15) 0.0127(5) Uani 1 3 d S . .
O1 O 0.09962(16) 1.19252(15) 0.28617(15) 0.0127(3) Uani 1 1 d . . .
Ca2 Ca 0.0689(6) 1.0000 0.2500 0.0097(10) Uiso 0.190(8) 2 d SP . .
O3 O 0.214(6) 0.907(7) 1.050(7) 0.030 Uiso 0.037(10) 1 d P . .
 
loop_
 _atom_site_aniso_label
 _atom_site_aniso_U_11
 _atom_site_aniso_U_22
 _atom_site_aniso_U_33
 _atom_site_aniso_U_23
 _atom_site_aniso_U_13
 _atom_site_aniso_U_12
Ca1 0.0138(7) 0.0076(3) 0.0101(3) 0.0009(2) 0.000 0.000
Al1 0.0073(2) 0.0073(2) 0.0073(2) -0.00020(19) -0.00020(19) -0.00020(19)
Al2 0.0065(3) 0.0065(3) 0.0059(4) 0.000 0.000 0.000
O2 0.0127(5) 0.0127(5) 0.0127(5) -0.0023(5) -0.0023(5) -0.0023(5)
O1 0.0139(7) 0.0104(6) 0.0137(7) -0.0042(4) 0.0073(5) -0.0024(5)
 
_geom_special_details
;
 All esds (except the esd in the dihedral angle between two l.s. planes)
 are estimated using the full covariance matrix.  The cell esds are taken
 into account individually in the estimation of esds in distances, angles
 and torsion angles; correlations between esds in cell parameters are only
 used when they are defined by crystal symmetry.  An approximate (isotropic)
 treatment of cell esds is used for estimating esds involving l.s. planes.
;
 
loop_
 _geom_bond_atom_site_label_1
 _geom_bond_atom_site_label_2
 _geom_bond_distance
 _geom_bond_site_symmetry_2
 _geom_bond_publ_flag
Ca1 O1 2.3502(17) . ?
Ca1 O1 2.3502(17) 2_575 ?
Ca1 O2 2.4165(15) 2_575 ?
Ca1 O2 2.4165(15) . ?
Ca1 O1 2.526(2) 44_456 ?
Ca1 O1 2.526(2) 17_564 ?
Ca1 O3 2.53(8) 11_475 ?
Ca1 O3 2.53(8) 9_455 ?
Ca1 O3 2.93(8) 2_576 ?
Ca1 O3 2.93(8) 1_554 ?
Ca1 Al1 3.1392(11) 32_354 ?
Ca1 Al1 3.1392(11) 5_455 ?
Al1 O2 1.723(3) . ?
Al1 O1 1.7709(18) 8_354 ?
Al1 O1 1.7709(18) 38_444 ?
Al1 O1 1.7709(18) 21_453 ?
Al1 Ca1 3.1392(11) 7 ?
Al1 Ca1 3.1392(11) 38_444 ?
Al1 Ca1 3.1392(11) 21_453 ?
Al1 Ca2 3.393(4) 7 ?
Al1 Ca2 3.393(4) 38_444 ?
Al1 Ca2 3.393(4) 21_453 ?
Al1 Ca2 3.395(2) 17_564 ?
Al1 Ca2 3.395(2) 9_465 ?
Al2 O1 1.7413(18) 31 ?
Al2 O1 1.7413(18) . ?
Al2 O1 1.7413(18) 29_355 ?
Al2 O1 1.7413(18) 3_575 ?
Al2 Ca1 3.1807(16) 37_465 ?
Al2 Ca1 3.1807(16) 9_465 ?
Al2 Ca2 3.4495(18) 31 ?
Al2 Ca2 3.4495(17) . ?
Al2 Ca2 3.4495(18) 29_355 ?
Al2 Ca2 3.4495(17) 3_575 ?
Al2 Ca1 3.5972(6) 31 ?
O2 Ca2 2.3555(11) 17_564 ?
O2 Ca2 2.3555(11) 9_465 ?
O2 Ca2 2.3555(11) . ?
O2 Ca1 2.4165(15) 17_564 ?
O2 Ca1 2.4165(15) 9_465 ?
O1 Al1 1.7709(18) 32_354 ?
O1 Ca2 2.376(2) . ?
O1 Ca1 2.526(2) 9_465 ?
O1 Ca2 2.945(7) 9_465 ?
Ca2 O3 2.07(8) 11_475 ?
Ca2 O3 2.07(8) 9_455 ?
Ca2 O2 2.3555(11) 2_575 ?
Ca2 O1 2.376(2) 2_575 ?
Ca2 O3 2.81(8) 7_556 ?
Ca2 O3 2.81(8) 30_553 ?
Ca2 O1 2.945(7) 44_456 ?
Ca2 O1 2.945(7) 17_564 ?
Ca2 Al1 3.393(4) 32_354 ?
Ca2 Al1 3.393(4) 5_455 ?
O3 O3 1.30(13) 13_466 ?
O3 O3 1.30(13) 40_565 ?
O3 O3 1.47(16) 28_546 ?
O3 Ca2 2.07(8) 17_565 ?
O3 Ca1 2.53(8) 17_565 ?
O3 Ca2 2.81(8) 5_456 ?
O3 Ca1 2.93(8) 1_556 ?
 
loop_
 _geom_angle_atom_site_label_1
 _geom_angle_atom_site_label_2
 _geom_angle_atom_site_label_3
 _geom_angle
 _geom_angle_site_symmetry_1
 _geom_angle_site_symmetry_3
 _geom_angle_publ_flag
O1 Ca1 O1 174.19(12) . 2_575 ?
O1 Ca1 O2 97.57(7) . 2_575 ?
O1 Ca1 O2 81.12(7) 2_575 2_575 ?
O1 Ca1 O2 81.12(7) . . ?
O1 Ca1 O2 97.57(7) 2_575 . ?
O2 Ca1 O2 154.06(10) 2_575 . ?
O1 Ca1 O1 117.13(6) . 44_456 ?
O1 Ca1 O1 68.21(9) 2_575 44_456 ?
O2 Ca1 O1 77.66(7) 2_575 44_456 ?
O2 Ca1 O1 126.15(6) . 44_456 ?
O1 Ca1 O1 68.21(9) . 17_564 ?
O1 Ca1 O1 117.13(6) 2_575 17_564 ?
O2 Ca1 O1 126.15(6) 2_575 17_564 ?
O2 Ca1 O1 77.66(7) . 17_564 ?
O1 Ca1 O1 66.14(9) 44_456 17_564 ?
O1 Ca1 O3 98.6(19) . 11_475 ?
O1 Ca1 O3 75.7(19) 2_575 11_475 ?
O2 Ca1 O3 63.4(17) 2_575 11_475 ?
O2 Ca1 O3 91.0(18) . 11_475 ?
O1 Ca1 O3 130.1(18) 44_456 11_475 ?
O1 Ca1 O3 163.6(18) 17_564 11_475 ?
O1 Ca1 O3 75.7(19) . 9_455 ?
O1 Ca1 O3 98.6(19) 2_575 9_455 ?
O2 Ca1 O3 91.0(18) 2_575 9_455 ?
O2 Ca1 O3 63.4(17) . 9_455 ?
O1 Ca1 O3 163.6(18) 44_456 9_455 ?
O1 Ca1 O3 130.1(18) 17_564 9_455 ?
O3 Ca1 O3 34(4) 11_475 9_455 ?
O1 Ca1 O3 59.9(16) . 2_576 ?
O1 Ca1 O3 123.0(16) 2_575 2_576 ?
O2 Ca1 O3 57.4(17) 2_575 2_576 ?
O2 Ca1 O3 137.0(17) . 2_576 ?
O1 Ca1 O3 66.3(15) 44_456 2_576 ?
O1 Ca1 O3 71.8(17) 17_564 2_576 ?
O3 Ca1 O3 111(3) 11_475 2_576 ?
O3 Ca1 O3 117.4(11) 9_455 2_576 ?
O1 Ca1 O3 123.0(16) . 1_554 ?
O1 Ca1 O3 59.9(16) 2_575 1_554 ?
O2 Ca1 O3 137.0(17) 2_575 1_554 ?
O2 Ca1 O3 57.4(17) . 1_554 ?
O1 Ca1 O3 71.8(17) 44_456 1_554 ?
O1 Ca1 O3 66.3(15) 17_564 1_554 ?
O3 Ca1 O3 117.4(11) 11_475 1_554 ?
O3 Ca1 O3 111(3) 9_455 1_554 ?
O3 Ca1 O3 129(3) 2_576 1_554 ?
O1 Ca1 Al1 33.94(5) . 32_354 ?
O1 Ca1 Al1 151.25(7) 2_575 32_354 ?
O2 Ca1 Al1 116.84(4) 2_575 32_354 ?
O2 Ca1 Al1 75.94(6) . 32_354 ?
O1 Ca1 Al1 92.72(6) 44_456 32_354 ?
O1 Ca1 Al1 34.31(4) 17_564 32_354 ?
O3 Ca1 Al1 131.6(19) 11_475 32_354 ?
O3 Ca1 Al1 103.0(19) 9_455 32_354 ?
O3 Ca1 Al1 61.7(17) 2_576 32_354 ?
O3 Ca1 Al1 94.5(15) 1_554 32_354 ?
O1 Ca1 Al1 151.25(7) . 5_455 ?
O1 Ca1 Al1 33.94(5) 2_575 5_455 ?
O2 Ca1 Al1 75.94(6) 2_575 5_455 ?
O2 Ca1 Al1 116.84(4) . 5_455 ?
O1 Ca1 Al1 34.31(4) 44_456 5_455 ?
O1 Ca1 Al1 92.72(6) 17_564 5_455 ?
O3 Ca1 Al1 103.0(19) 11_475 5_455 ?
O3 Ca1 Al1 131.6(19) 9_455 5_455 ?
O3 Ca1 Al1 94.5(15) 2_576 5_455 ?
O3 Ca1 Al1 61.7(17) 1_554 5_455 ?
Al1 Ca1 Al1 124.64(5) 32_354 5_455 ?
O2 Al1 O1 116.80(6) . 8_354 ?
O2 Al1 O1 116.80(6) . 38_444 ?
O1 Al1 O1 101.25(8) 8_354 38_444 ?
O2 Al1 O1 116.80(6) . 21_453 ?
O1 Al1 O1 101.25(8) 8_354 21_453 ?
O1 Al1 O1 101.25(8) 38_444 21_453 ?
O2 Al1 Ca1 137.431(18) . 7 ?
O1 Al1 Ca1 47.81(7) 8_354 7 ?
O1 Al1 Ca1 105.67(7) 38_444 7 ?
O1 Al1 Ca1 53.51(7) 21_453 7 ?
O2 Al1 Ca1 137.430(18) . 38_444 ?
O1 Al1 Ca1 53.51(7) 8_354 38_444 ?
O1 Al1 Ca1 47.81(7) 38_444 38_444 ?
O1 Al1 Ca1 105.67(7) 21_453 38_444 ?
Ca1 Al1 Ca1 71.73(3) 7 38_444 ?
O2 Al1 Ca1 137.431(18) . 21_453 ?
O1 Al1 Ca1 105.67(7) 8_354 21_453 ?
O1 Al1 Ca1 53.51(7) 38_444 21_453 ?
O1 Al1 Ca1 47.81(7) 21_453 21_453 ?
Ca1 Al1 Ca1 71.73(3) 7 21_453 ?
Ca1 Al1 Ca1 71.73(3) 38_444 21_453 ?
O2 Al1 Ca2 139.84(3) . 7 ?
O1 Al1 Ca2 41.48(11) 8_354 7 ?
O1 Al1 Ca2 102.26(9) 38_444 7 ?
O1 Al1 Ca2 60.20(11) 21_453 7 ?
Ca1 Al1 Ca2 7.30(8) 7 7 ?
Ca1 Al1 Ca2 65.37(8) 38_444 7 ?
Ca1 Al1 Ca2 73.75(3) 21_453 7 ?
O2 Al1 Ca2 139.84(3) . 38_444 ?
O1 Al1 Ca2 60.20(11) 8_354 38_444 ?
O1 Al1 Ca2 41.48(11) 38_444 38_444 ?
O1 Al1 Ca2 102.26(9) 21_453 38_444 ?
Ca1 Al1 Ca2 73.75(3) 7 38_444 ?
Ca1 Al1 Ca2 7.30(8) 38_444 38_444 ?
Ca1 Al1 Ca2 65.37(8) 21_453 38_444 ?
Ca2 Al1 Ca2 67.91(5) 7 38_444 ?
O2 Al1 Ca2 139.84(3) . 21_453 ?
O1 Al1 Ca2 102.26(9) 8_354 21_453 ?
O1 Al1 Ca2 60.20(11) 38_444 21_453 ?
O1 Al1 Ca2 41.48(11) 21_453 21_453 ?
Ca1 Al1 Ca2 65.37(8) 7 21_453 ?
Ca1 Al1 Ca2 73.75(3) 38_444 21_453 ?
Ca1 Al1 Ca2 7.30(8) 21_453 21_453 ?
Ca2 Al1 Ca2 67.91(5) 7 21_453 ?
Ca2 Al1 Ca2 67.91(5) 38_444 21_453 ?
O2 Al1 Ca2 40.13(7) . 17_564 ?
O1 Al1 Ca2 119.97(12) 8_354 17_564 ?
O1 Al1 Ca2 77.73(7) 38_444 17_564 ?
O1 Al1 Ca2 138.34(13) 21_453 17_564 ?
Ca1 Al1 Ca2 167.51(11) 7 17_564 ?
Ca1 Al1 Ca2 103.65(10) 38_444 17_564 ?
Ca1 Al1 Ca2 118.48(5) 21_453 17_564 ?
Ca2 Al1 Ca2 161.4(2) 7 17_564 ?
Ca2 Al1 Ca2 103.17(10) 38_444 17_564 ?
Ca2 Al1 Ca2 125.26(13) 21_453 17_564 ?
O2 Al1 Ca2 40.13(7) . 9_465 ?
O1 Al1 Ca2 138.34(13) 8_354 9_465 ?
O1 Al1 Ca2 119.97(12) 38_444 9_465 ?
O1 Al1 Ca2 77.73(7) 21_453 9_465 ?
Ca1 Al1 Ca2 118.48(5) 7 9_465 ?
Ca1 Al1 Ca2 167.51(11) 38_444 9_465 ?
Ca1 Al1 Ca2 103.65(10) 21_453 9_465 ?
Ca2 Al1 Ca2 125.26(13) 7 9_465 ?
Ca2 Al1 Ca2 161.4(2) 38_444 9_465 ?
Ca2 Al1 Ca2 103.17(10) 21_453 9_465 ?
Ca2 Al1 Ca2 67.86(11) 17_564 9_465 ?
O1 Al2 O1 111.94(7) 31 . ?
O1 Al2 O1 104.64(14) 31 29_355 ?
O1 Al2 O1 111.94(7) . 29_355 ?
O1 Al2 O1 111.94(7) 31 3_575 ?
O1 Al2 O1 104.64(14) . 3_575 ?
O1 Al2 O1 111.94(7) 29_355 3_575 ?
O1 Al2 Ca1 52.32(7) 31 37_465 ?
O1 Al2 Ca1 127.68(7) . 37_465 ?
O1 Al2 Ca1 52.32(7) 29_355 37_465 ?
O1 Al2 Ca1 127.68(7) 3_575 37_465 ?
O1 Al2 Ca1 127.68(7) 31 9_465 ?
O1 Al2 Ca1 52.32(7) . 9_465 ?
O1 Al2 Ca1 127.68(7) 29_355 9_465 ?
O1 Al2 Ca1 52.32(7) 3_575 9_465 ?
Ca1 Al2 Ca1 180.0 37_465 9_465 ?
O1 Al2 Ca2 39.37(11) 31 31 ?
O1 Al2 Ca2 76.40(8) . 31 ?
O1 Al2 Ca2 104.02(10) 29_355 31 ?
O1 Al2 Ca2 140.00(12) 3_575 31 ?
Ca1 Al2 Ca2 64.265(14) 37_465 31 ?
Ca1 Al2 Ca2 115.735(15) 9_465 31 ?
O1 Al2 Ca2 140.00(12) 31 . ?
O1 Al2 Ca2 39.37(11) . . ?
O1 Al2 Ca2 76.40(8) 29_355 . ?
O1 Al2 Ca2 104.02(10) 3_575 . ?
Ca1 Al2 Ca2 115.735(14) 37_465 . ?
Ca1 Al2 Ca2 64.265(14) 9_465 . ?
Ca2 Al2 Ca2 100.867(11) 31 . ?
O1 Al2 Ca2 104.02(10) 31 29_355 ?
O1 Al2 Ca2 140.00(12) . 29_355 ?
O1 Al2 Ca2 39.37(11) 29_355 29_355 ?
O1 Al2 Ca2 76.40(8) 3_575 29_355 ?
Ca1 Al2 Ca2 64.265(14) 37_465 29_355 ?
Ca1 Al2 Ca2 115.735(15) 9_465 29_355 ?
Ca2 Al2 Ca2 128.53(3) 31 29_355 ?
Ca2 Al2 Ca2 100.867(11) . 29_355 ?
O1 Al2 Ca2 76.40(8) 31 3_575 ?
O1 Al2 Ca2 104.02(10) . 3_575 ?
O1 Al2 Ca2 140.00(12) 29_355 3_575 ?
O1 Al2 Ca2 39.37(11) 3_575 3_575 ?
Ca1 Al2 Ca2 115.735(14) 37_465 3_575 ?
Ca1 Al2 Ca2 64.265(14) 9_465 3_575 ?
Ca2 Al2 Ca2 100.867(10) 31 3_575 ?
Ca2 Al2 Ca2 128.53(3) . 3_575 ?
Ca2 Al2 Ca2 100.867(12) 29_355 3_575 ?
O1 Al2 Ca1 33.48(6) 31 31 ?
O1 Al2 Ca1 80.10(6) . 31 ?
O1 Al2 Ca1 108.97(7) 29_355 31 ?
O1 Al2 Ca1 132.92(6) 3_575 31 ?
Ca1 Al2 Ca1 65.394(4) 37_465 31 ?
Ca1 Al2 Ca1 114.606(5) 9_465 31 ?
Ca2 Al2 Ca1 7.55(10) 31 31 ?
Ca2 Al2 Ca1 107.36(10) . 31 ?
Ca2 Al2 Ca1 129.03(3) 29_355 31 ?
Ca2 Al2 Ca1 93.63(8) 3_575 31 ?
O1 Al2 Ca1 132.92(6) 31 . ?
O1 Al2 Ca1 33.48(6) . . ?
O1 Al2 Ca1 80.10(6) 29_355 . ?
O1 Al2 Ca1 108.97(7) 3_575 . ?
Ca1 Al2 Ca1 114.606(4) 37_465 . ?
Ca1 Al2 Ca1 65.394(4) 9_465 . ?
Ca2 Al2 Ca1 93.63(8) 31 . ?
Ca2 Al2 Ca1 7.55(10) . . ?
Ca2 Al2 Ca1 107.36(10) 29_355 . ?
Ca2 Al2 Ca1 129.03(3) 3_575 . ?
Ca1 Al2 Ca1 99.984(3) 31 . ?
Al1 O2 Ca2 111.73(13) . 17_564 ?
Al1 O2 Ca2 111.73(13) . 9_465 ?
Ca2 O2 Ca2 107.12(14) 17_564 9_465 ?
Al1 O2 Ca2 111.73(13) . . ?
Ca2 O2 Ca2 107.12(14) 17_564 . ?
Ca2 O2 Ca2 107.12(14) 9_465 . ?
Al1 O2 Ca1 118.51(7) . 17_564 ?
Ca2 O2 Ca1 11.62(14) 17_564 17_564 ?
Ca2 O2 Ca1 95.54(8) 9_465 17_564 ?
Ca2 O2 Ca1 110.66(19) . 17_564 ?
Al1 O2 Ca1 118.51(7) . 9_465 ?
Ca2 O2 Ca1 110.66(19) 17_564 9_465 ?
Ca2 O2 Ca1 11.62(14) 9_465 9_465 ?
Ca2 O2 Ca1 95.54(8) . 9_465 ?
Ca1 O2 Ca1 99.11(8) 17_564 9_465 ?
Al1 O2 Ca1 118.51(7) . . ?
Ca2 O2 Ca1 95.54(8) 17_564 . ?
Ca2 O2 Ca1 110.66(19) 9_465 . ?
Ca2 O2 Ca1 11.62(15) . . ?
Ca1 O2 Ca1 99.11(8) 17_564 . ?
Ca1 O2 Ca1 99.11(8) 9_465 . ?
Al2 O1 Al1 137.23(11) . 32_354 ?
Al2 O1 Ca1 122.39(9) . . ?
Al1 O1 Ca1 98.25(9) 32_354 . ?
Al2 O1 Ca2 112.92(16) . . ?
Al1 O1 Ca2 108.93(18) 32_354 . ?
Ca1 O1 Ca2 11.81(14) . . ?
Al2 O1 Ca1 94.61(9) . 9_465 ?
Al1 O1 Ca1 92.18(8) 32_354 9_465 ?
Ca1 O1 Ca1 97.88(7) . 9_465 ?
Ca2 O1 Ca1 92.22(11) . 9_465 ?
Al2 O1 Ca2 99.78(11) . 9_465 ?
Al1 O1 Ca2 88.35(8) 32_354 9_465 ?
Ca1 O1 Ca2 94.99(7) . 9_465 ?
Ca2 O1 Ca2 90.18(11) . 9_465 ?
Ca1 O1 Ca2 5.17(5) 9_465 9_465 ?
O3 Ca2 O3 42(4) 11_475 9_455 ?
O3 Ca2 O2 72(2) 11_475 2_575 ?
O3 Ca2 O2 106(2) 9_455 2_575 ?
O3 Ca2 O2 106(2) 11_475 . ?
O3 Ca2 O2 72(2) 9_455 . ?
O2 Ca2 O2 177.3(4) 2_575 . ?
O3 Ca2 O1 113(2) 11_475 . ?
O3 Ca2 O1 85(2) 9_455 . ?
O2 Ca2 O1 98.56(7) 2_575 . ?
O2 Ca2 O1 81.87(7) . . ?
O3 Ca2 O1 85(2) 11_475 2_575 ?
O3 Ca2 O1 113(2) 9_455 2_575 ?
O2 Ca2 O1 81.87(7) 2_575 2_575 ?
O2 Ca2 O1 98.56(7) . 2_575 ?
O1 Ca2 O1 162.2(4) . 2_575 ?
O3 Ca2 O3 26(3) 11_475 7_556 ?
O3 Ca2 O3 26(3) 9_455 7_556 ?
O2 Ca2 O3 97.3(18) 2_575 7_556 ?
O2 Ca2 O3 80.1(18) . 7_556 ?
O1 Ca2 O3 109.8(16) . 7_556 ?
O1 Ca2 O3 87.8(15) 2_575 7_556 ?
O3 Ca2 O3 26(3) 11_475 30_553 ?
O3 Ca2 O3 26(3) 9_455 30_553 ?
O2 Ca2 O3 80.1(18) 2_575 30_553 ?
O2 Ca2 O3 97.3(18) . 30_553 ?
O1 Ca2 O3 87.8(15) . 30_553 ?
O1 Ca2 O3 109.8(16) 2_575 30_553 ?
O3 Ca2 O3 30(3) 7_556 30_553 ?
O3 Ca2 O1 131(2) 11_475 44_456 ?
O3 Ca2 O1 172(2) 9_455 44_456 ?
O2 Ca2 O1 70.58(13) 2_575 44_456 ?
O2 Ca2 O1 112.0(2) . 44_456 ?
O1 Ca2 O1 102.4(2) . 44_456 ?
O1 Ca2 O1 60.82(14) 2_575 44_456 ?
O3 Ca2 O1 147.1(16) 7_556 44_456 ?
O3 Ca2 O1 150.0(18) 30_553 44_456 ?
O3 Ca2 O1 172(2) 11_475 17_564 ?
O3 Ca2 O1 131(2) 9_455 17_564 ?
O2 Ca2 O1 112.0(2) 2_575 17_564 ?
O2 Ca2 O1 70.58(13) . 17_564 ?
O1 Ca2 O1 60.82(14) . 17_564 ?
O1 Ca2 O1 102.4(2) 2_575 17_564 ?
O3 Ca2 O1 150.0(18) 7_556 17_564 ?
O3 Ca2 O1 147.1(16) 30_553 17_564 ?
O1 Ca2 O1 55.79(15) 44_456 17_564 ?
O3 Ca2 Al1 142(2) 11_475 32_354 ?
O3 Ca2 Al1 107(2) 9_455 32_354 ?
O2 Ca2 Al1 110.07(13) 2_575 32_354 ?
O2 Ca2 Al1 71.57(10) . 32_354 ?
O1 Ca2 Al1 29.59(8) . 32_354 ?
O1 Ca2 Al1 133.8(3) 2_575 32_354 ?
O3 Ca2 Al1 131.7(16) 7_556 32_354 ?
O3 Ca2 Al1 116.2(16) 30_553 32_354 ?
O1 Ca2 Al1 80.78(16) 44_456 32_354 ?
O1 Ca2 Al1 31.45(5) 17_564 32_354 ?
O3 Ca2 Al1 107(2) 11_475 5_455 ?
O3 Ca2 Al1 142(2) 9_455 5_455 ?
O2 Ca2 Al1 71.57(10) 2_575 5_455 ?
O2 Ca2 Al1 110.07(13) . 5_455 ?
O1 Ca2 Al1 133.8(3) . 5_455 ?
O1 Ca2 Al1 29.59(8) 2_575 5_455 ?
O3 Ca2 Al1 116.2(15) 7_556 5_455 ?
O3 Ca2 Al1 131.7(16) 30_553 5_455 ?
O1 Ca2 Al1 31.45(5) 44_456 5_455 ?
O1 Ca2 Al1 80.78(16) 17_564 5_455 ?
Al1 Ca2 Al1 110.0(2) 32_354 5_455 ?
O3 O3 O3 69(7) 13_466 40_565 ?
O3 O3 O3 55(3) 13_466 28_546 ?
O3 O3 O3 55(3) 40_565 28_546 ?
O3 O3 Ca2 111(7) 13_466 17_565 ?
O3 O3 Ca2 111(7) 40_565 17_565 ?
O3 O3 Ca2 69(2) 28_546 17_565 ?
O3 O3 Ca1 114(7) 13_466 17_565 ?
O3 O3 Ca1 114(7) 40_565 17_565 ?
O3 O3 Ca1 73.1(18) 28_546 17_565 ?
Ca2 O3 Ca1 3.9(4) 17_565 17_565 ?
O3 O3 Ca2 43(6) 13_466 5_456 ?
O3 O3 Ca2 43(6) 40_565 5_456 ?
O3 O3 Ca2 74.8(16) 28_546 5_456 ?
Ca2 O3 Ca2 144(4) 17_565 5_456 ?
Ca1 O3 Ca2 148(3) 17_565 5_456 ?
O3 O3 Ca1 132(7) 13_466 1_556 ?
O3 O3 Ca1 146(7) 40_565 1_556 ?
O3 O3 Ca1 156(3) 28_546 1_556 ?
Ca2 O3 Ca1 88(3) 17_565 1_556 ?
Ca1 O3 Ca1 84(2) 17_565 1_556 ?
Ca2 O3 Ca1 127(3) 5_456 1_556 ?
 
loop_
 _geom_torsion_atom_site_label_1
 _geom_torsion_atom_site_label_2
 _geom_torsion_atom_site_label_3
 _geom_torsion_atom_site_label_4
 _geom_torsion
 _geom_torsion_site_symmetry_1
 _geom_torsion_site_symmetry_2
 _geom_torsion_site_symmetry_3
 _geom_torsion_site_symmetry_4
 _geom_torsion_publ_flag
O1 Ca1 Al2 O1 -61.2(2) . . . 31 ?
O1 Ca1 Al2 O1 126.28(17) 2_575 . . 31 ?
O2 Ca1 Al2 O1 80.42(10) 2_575 . . 31 ?
O2 Ca1 Al2 O1 -123.94(11) . . . 31 ?
O1 Ca1 Al2 O1 15.04(13) 44_456 . . 31 ?
O1 Ca1 Al2 O1 -46.24(9) 17_564 . . 31 ?
O3 Ca1 Al2 O1 145.5(18) 11_475 . . 31 ?
O3 Ca1 Al2 O1 178(2) 9_455 . . 31 ?
O3 Ca1 Al2 O1 22(2) 2_576 . . 31 ?
O3 Ca1 Al2 O1 -95(3) 1_554 . . 31 ?
Al1 Ca1 Al2 O1 -52.05(10) 32_354 . . 31 ?
Al1 Ca1 Al2 O1 52.07(14) 5_455 . . 31 ?
O1 Ca1 Al2 O1 -172.48(15) 2_575 . . . ?
O2 Ca1 Al2 O1 141.65(14) 2_575 . . . ?
O2 Ca1 Al2 O1 -62.70(13) . . . . ?
O1 Ca1 Al2 O1 76.27(13) 44_456 . . . ?
O1 Ca1 Al2 O1 15.00(14) 17_564 . . . ?
O3 Ca1 Al2 O1 -153.3(18) 11_475 . . . ?
O3 Ca1 Al2 O1 -121(2) 9_455 . . . ?
O3 Ca1 Al2 O1 83(2) 2_576 . . . ?
O3 Ca1 Al2 O1 -34(3) 1_554 . . . ?
Al1 Ca1 Al2 O1 9.18(13) 32_354 . . . ?
Al1 Ca1 Al2 O1 113.31(17) 5_455 . . . ?
O1 Ca1 Al2 O1 -162.07(9) . . . 29_355 ?
O1 Ca1 Al2 O1 25.45(10) 2_575 . . 29_355 ?
O2 Ca1 Al2 O1 -20.42(7) 2_575 . . 29_355 ?
O2 Ca1 Al2 O1 135.22(9) . . . 29_355 ?
O1 Ca1 Al2 O1 -85.80(7) 44_456 . . 29_355 ?
O1 Ca1 Al2 O1 -147.08(9) 17_564 . . 29_355 ?
O3 Ca1 Al2 O1 44.6(18) 11_475 . . 29_355 ?
O3 Ca1 Al2 O1 77(2) 9_455 . . 29_355 ?
O3 Ca1 Al2 O1 -79(2) 2_576 . . 29_355 ?
O3 Ca1 Al2 O1 164(3) 1_554 . . 29_355 ?
Al1 Ca1 Al2 O1 -152.89(7) 32_354 . . 29_355 ?
Al1 Ca1 Al2 O1 -48.77(11) 5_455 . . 29_355 ?
O1 Ca1 Al2 O1 87.99(18) . . . 3_575 ?
O1 Ca1 Al2 O1 -84.49(12) 2_575 . . 3_575 ?
O2 Ca1 Al2 O1 -130.36(7) 2_575 . . 3_575 ?
O2 Ca1 Al2 O1 25.28(9) . . . 3_575 ?
O1 Ca1 Al2 O1 164.26(8) 44_456 . . 3_575 ?
O1 Ca1 Al2 O1 102.98(9) 17_564 . . 3_575 ?
O3 Ca1 Al2 O1 -65.3(18) 11_475 . . 3_575 ?
O3 Ca1 Al2 O1 -33(2) 9_455 . . 3_575 ?
O3 Ca1 Al2 O1 171(2) 2_576 . . 3_575 ?
O3 Ca1 Al2 O1 54(3) 1_554 . . 3_575 ?
Al1 Ca1 Al2 O1 97.17(7) 32_354 . . 3_575 ?
Al1 Ca1 Al2 O1 -158.71(11) 5_455 . . 3_575 ?
O1 Ca1 Al2 Ca1 -121.75(12) . . . 37_465 ?
O1 Ca1 Al2 Ca1 65.77(12) 2_575 . . 37_465 ?
O2 Ca1 Al2 Ca1 19.90(4) 2_575 . . 37_465 ?
O2 Ca1 Al2 Ca1 175.54(6) . . . 37_465 ?
O1 Ca1 Al2 Ca1 -45.48(6) 44_456 . . 37_465 ?
O1 Ca1 Al2 Ca1 -106.75(4) 17_564 . . 37_465 ?
O3 Ca1 Al2 Ca1 85.0(18) 11_475 . . 37_465 ?
O3 Ca1 Al2 Ca1 117(2) 9_455 . . 37_465 ?
O3 Ca1 Al2 Ca1 -39(2) 2_576 . . 37_465 ?
O3 Ca1 Al2 Ca1 -156(3) 1_554 . . 37_465 ?
Al1 Ca1 Al2 Ca1 -112.570(17) 32_354 . . 37_465 ?
Al1 Ca1 Al2 Ca1 -8.45(10) 5_455 . . 37_465 ?
O1 Ca1 Al2 Ca1 58.25(13) . . . 9_465 ?
O1 Ca1 Al2 Ca1 -114.23(12) 2_575 . . 9_465 ?
O2 Ca1 Al2 Ca1 -160.10(4) 2_575 . . 9_465 ?
O2 Ca1 Al2 Ca1 -4.46(6) . . . 9_465 ?
O1 Ca1 Al2 Ca1 134.52(6) 44_456 . . 9_465 ?
O1 Ca1 Al2 Ca1 73.25(4) 17_564 . . 9_465 ?
O3 Ca1 Al2 Ca1 -95.0(18) 11_475 . . 9_465 ?
O3 Ca1 Al2 Ca1 -63(2) 9_455 . . 9_465 ?
O3 Ca1 Al2 Ca1 141(2) 2_576 . . 9_465 ?
O3 Ca1 Al2 Ca1 24(3) 1_554 . . 9_465 ?
Al1 Ca1 Al2 Ca1 67.430(17) 32_354 . . 9_465 ?
Al1 Ca1 Al2 Ca1 171.55(10) 5_455 . . 9_465 ?
O1 Ca1 Al2 Ca2 -58.46(14) . . . 31 ?
O1 Ca1 Al2 Ca2 129.06(15) 2_575 . . 31 ?
O2 Ca1 Al2 Ca2 83.19(9) 2_575 . . 31 ?
O2 Ca1 Al2 Ca2 -121.17(7) . . . 31 ?
O1 Ca1 Al2 Ca2 17.81(10) 44_456 . . 31 ?
O1 Ca1 Al2 Ca2 -43.46(6) 17_564 . . 31 ?
O3 Ca1 Al2 Ca2 148.3(18) 11_475 . . 31 ?
O3 Ca1 Al2 Ca2 -179(2) 9_455 . . 31 ?
O3 Ca1 Al2 Ca2 24(2) 2_576 . . 31 ?
O3 Ca1 Al2 Ca2 -92(3) 1_554 . . 31 ?
Al1 Ca1 Al2 Ca2 -49.28(6) 32_354 . . 31 ?
Al1 Ca1 Al2 Ca2 54.84(15) 5_455 . . 31 ?
O1 Ca1 Al2 Ca2 137.91(13) . . . . ?
O1 Ca1 Al2 Ca2 -34.57(11) 2_575 . . . ?
O2 Ca1 Al2 Ca2 -80.44(3) 2_575 . . . ?
O2 Ca1 Al2 Ca2 75.20(6) . . . . ?
O1 Ca1 Al2 Ca2 -145.82(6) 44_456 . . . ?
O1 Ca1 Al2 Ca2 152.91(4) 17_564 . . . ?
O3 Ca1 Al2 Ca2 -15.4(18) 11_475 . . . ?
O3 Ca1 Al2 Ca2 17(2) 9_455 . . . ?
O3 Ca1 Al2 Ca2 -139(2) 2_576 . . . ?
O3 Ca1 Al2 Ca2 104(3) 1_554 . . . ?
Al1 Ca1 Al2 Ca2 147.090(19) 32_354 . . . ?
Al1 Ca1 Al2 Ca2 -108.79(9) 5_455 . . . ?
O1 Ca1 Al2 Ca2 169.18(13) . . . 29_355 ?
O1 Ca1 Al2 Ca2 -3.30(13) 2_575 . . 29_355 ?
O2 Ca1 Al2 Ca2 -49.17(6) 2_575 . . 29_355 ?
O2 Ca1 Al2 Ca2 106.47(6) . . . 29_355 ?
O1 Ca1 Al2 Ca2 -114.55(8) 44_456 . . 29_355 ?
O1 Ca1 Al2 Ca2 -175.82(4) 17_564 . . 29_355 ?
O3 Ca1 Al2 Ca2 15.9(18) 11_475 . . 29_355 ?
O3 Ca1 Al2 Ca2 48(2) 9_455 . . 29_355 ?
O3 Ca1 Al2 Ca2 -108(2) 2_576 . . 29_355 ?
O3 Ca1 Al2 Ca2 135(3) 1_554 . . 29_355 ?
Al1 Ca1 Al2 Ca2 178.36(3) 32_354 . . 29_355 ?
Al1 Ca1 Al2 Ca2 -77.52(12) 5_455 . . 29_355 ?
O1 Ca1 Al2 Ca2 48.67(17) . . . 3_575 ?
O1 Ca1 Al2 Ca2 -123.8(2) 2_575 . . 3_575 ?
O2 Ca1 Al2 Ca2 -169.68(15) 2_575 . . 3_575 ?
O2 Ca1 Al2 Ca2 -14.03(12) . . . 3_575 ?
O1 Ca1 Al2 Ca2 124.94(16) 44_456 . . 3_575 ?
O1 Ca1 Al2 Ca2 63.67(12) 17_564 . . 3_575 ?
O3 Ca1 Al2 Ca2 -104.6(18) 11_475 . . 3_575 ?
O3 Ca1 Al2 Ca2 -72(2) 9_455 . . 3_575 ?
O3 Ca1 Al2 Ca2 132(2) 2_576 . . 3_575 ?
O3 Ca1 Al2 Ca2 15(3) 1_554 . . 3_575 ?
Al1 Ca1 Al2 Ca2 57.85(12) 32_354 . . 3_575 ?
Al1 Ca1 Al2 Ca2 162.0(2) 5_455 . . 3_575 ?
O1 Ca1 Al2 Ca1 -54.36(12) . . . 31 ?
O1 Ca1 Al2 Ca1 133.16(12) 2_575 . . 31 ?
O2 Ca1 Al2 Ca1 87.30(5) 2_575 . . 31 ?
O2 Ca1 Al2 Ca1 -117.06(6) . . . 31 ?
O1 Ca1 Al2 Ca1 21.92(7) 44_456 . . 31 ?
O1 Ca1 Al2 Ca1 -39.36(4) 17_564 . . 31 ?
O3 Ca1 Al2 Ca1 152.4(18) 11_475 . . 31 ?
O3 Ca1 Al2 Ca1 -175(2) 9_455 . . 31 ?
O3 Ca1 Al2 Ca1 28(2) 2_576 . . 31 ?
O3 Ca1 Al2 Ca1 -88(3) 1_554 . . 31 ?
Al1 Ca1 Al2 Ca1 -45.176(17) 32_354 . . 31 ?
Al1 Ca1 Al2 Ca1 58.95(11) 5_455 . . 31 ?
O1 Al1 O2 Ca2 105.61(17) 8_354 . . 17_564 ?
O1 Al1 O2 Ca2 -14.39(17) 38_444 . . 17_564 ?
O1 Al1 O2 Ca2 -134.39(17) 21_453 . . 17_564 ?
Ca1 Al1 O2 Ca2 161.40(18) 7 . . 17_564 ?
Ca1 Al1 O2 Ca2 41.40(18) 38_444 . . 17_564 ?
Ca1 Al1 O2 Ca2 -78.60(18) 21_453 . . 17_564 ?
Ca2 Al1 O2 Ca2 151.0(3) 7 . . 17_564 ?
Ca2 Al1 O2 Ca2 31.0(3) 38_444 . . 17_564 ?
Ca2 Al1 O2 Ca2 -89.0(3) 21_453 . . 17_564 ?
Ca2 Al1 O2 Ca2 -120.0 9_465 . . 17_564 ?
O1 Al1 O2 Ca2 -134.39(17) 8_354 . . 9_465 ?
O1 Al1 O2 Ca2 105.61(17) 38_444 . . 9_465 ?
O1 Al1 O2 Ca2 -14.39(17) 21_453 . . 9_465 ?
Ca1 Al1 O2 Ca2 -78.60(18) 7 . . 9_465 ?
Ca1 Al1 O2 Ca2 161.40(18) 38_444 . . 9_465 ?
Ca1 Al1 O2 Ca2 41.40(18) 21_453 . . 9_465 ?
Ca2 Al1 O2 Ca2 -89.0(3) 7 . . 9_465 ?
Ca2 Al1 O2 Ca2 151.0(3) 38_444 . . 9_465 ?
Ca2 Al1 O2 Ca2 31.0(3) 21_453 . . 9_465 ?
Ca2 Al1 O2 Ca2 120.0 17_564 . . 9_465 ?
O1 Al1 O2 Ca2 -14.39(17) 8_354 . . . ?
O1 Al1 O2 Ca2 -134.39(17) 38_444 . . . ?
O1 Al1 O2 Ca2 105.61(17) 21_453 . . . ?
Ca1 Al1 O2 Ca2 41.40(18) 7 . . . ?
Ca1 Al1 O2 Ca2 -78.60(18) 38_444 . . . ?
Ca1 Al1 O2 Ca2 161.40(18) 21_453 . . . ?
Ca2 Al1 O2 Ca2 31.0(3) 7 . . . ?
Ca2 Al1 O2 Ca2 -89.0(3) 38_444 . . . ?
Ca2 Al1 O2 Ca2 151.0(3) 21_453 . . . ?
Ca2 Al1 O2 Ca2 -120.0 17_564 . . . ?
Ca2 Al1 O2 Ca2 120.0 9_465 . . . ?
O1 Al1 O2 Ca1 116.05(8) 8_354 . . 17_564 ?
O1 Al1 O2 Ca1 -3.95(8) 38_444 . . 17_564 ?
O1 Al1 O2 Ca1 -123.95(8) 21_453 . . 17_564 ?
Ca1 Al1 O2 Ca1 171.84(7) 7 . . 17_564 ?
Ca1 Al1 O2 Ca1 51.84(7) 38_444 . . 17_564 ?
Ca1 Al1 O2 Ca1 -68.16(7) 21_453 . . 17_564 ?
Ca2 Al1 O2 Ca1 161.40(18) 7 . . 17_564 ?
Ca2 Al1 O2 Ca1 41.40(18) 38_444 . . 17_564 ?
Ca2 Al1 O2 Ca1 -78.60(18) 21_453 . . 17_564 ?
Ca2 Al1 O2 Ca1 10.44(12) 17_564 . . 17_564 ?
Ca2 Al1 O2 Ca1 -109.56(12) 9_465 . . 17_564 ?
O1 Al1 O2 Ca1 -123.95(8) 8_354 . . 9_465 ?
O1 Al1 O2 Ca1 116.05(8) 38_444 . . 9_465 ?
O1 Al1 O2 Ca1 -3.95(8) 21_453 . . 9_465 ?
Ca1 Al1 O2 Ca1 -68.16(7) 7 . . 9_465 ?
Ca1 Al1 O2 Ca1 171.84(7) 38_444 . . 9_465 ?
Ca1 Al1 O2 Ca1 51.84(7) 21_453 . . 9_465 ?
Ca2 Al1 O2 Ca1 -78.60(18) 7 . . 9_465 ?
Ca2 Al1 O2 Ca1 161.40(18) 38_444 . . 9_465 ?
Ca2 Al1 O2 Ca1 41.40(18) 21_453 . . 9_465 ?
Ca2 Al1 O2 Ca1 130.44(12) 17_564 . . 9_465 ?
Ca2 Al1 O2 Ca1 10.44(12) 9_465 . . 9_465 ?
O1 Al1 O2 Ca1 -3.95(8) 8_354 . . . ?
O1 Al1 O2 Ca1 -123.95(8) 38_444 . . . ?
O1 Al1 O2 Ca1 116.05(8) 21_453 . . . ?
Ca1 Al1 O2 Ca1 51.84(7) 7 . . . ?
Ca1 Al1 O2 Ca1 -68.16(7) 38_444 . . . ?
Ca1 Al1 O2 Ca1 171.84(7) 21_453 . . . ?
Ca2 Al1 O2 Ca1 41.40(18) 7 . . . ?
Ca2 Al1 O2 Ca1 -78.60(18) 38_444 . . . ?
Ca2 Al1 O2 Ca1 161.40(18) 21_453 . . . ?
Ca2 Al1 O2 Ca1 -109.56(12) 17_564 . . . ?
Ca2 Al1 O2 Ca1 130.44(12) 9_465 . . . ?
O1 Ca1 O2 Al1 -145.74(5) . . . . ?
O1 Ca1 O2 Al1 28.54(8) 2_575 . . . ?
O2 Ca1 O2 Al1 -56.69(2) 2_575 . . . ?
O1 Ca1 O2 Al1 97.03(9) 44_456 . . . ?
O1 Ca1 O2 Al1 144.77(4) 17_564 . . . ?
O3 Ca1 O2 Al1 -47.2(19) 11_475 . . . ?
O3 Ca1 O2 Al1 -67(2) 9_455 . . . ?
O3 Ca1 O2 Al1 -170(2) 2_576 . . . ?
O3 Ca1 O2 Al1 75.2(18) 1_554 . . . ?
Al1 Ca1 O2 Al1 180.0 32_354 . . . ?
Al1 Ca1 O2 Al1 57.99(7) 5_455 . . . ?
O1 Ca1 O2 Ca2 95.83(16) . . . 17_564 ?
O1 Ca1 O2 Ca2 -89.9(2) 2_575 . . 17_564 ?
O2 Ca1 O2 Ca2 -175.12(18) 2_575 . . 17_564 ?
O1 Ca1 O2 Ca2 -21.4(2) 44_456 . . 17_564 ?
O1 Ca1 O2 Ca2 26.34(17) 17_564 . . 17_564 ?
O3 Ca1 O2 Ca2 -165.6(19) 11_475 . . 17_564 ?
O3 Ca1 O2 Ca2 174(2) 9_455 . . 17_564 ?
O3 Ca1 O2 Ca2 72(2) 2_576 . . 17_564 ?
O3 Ca1 O2 Ca2 -43.2(18) 1_554 . . 17_564 ?
Al1 Ca1 O2 Ca2 61.57(16) 32_354 . . 17_564 ?
Al1 Ca1 O2 Ca2 -60.4(2) 5_455 . . 17_564 ?
O1 Ca1 O2 Ca2 -14.82(8) . . . 9_465 ?
O1 Ca1 O2 Ca2 159.47(10) 2_575 . . 9_465 ?
O2 Ca1 O2 Ca2 74.23(6) 2_575 . . 9_465 ?
O1 Ca1 O2 Ca2 -132.04(7) 44_456 . . 9_465 ?
O1 Ca1 O2 Ca2 -84.31(9) 17_564 . . 9_465 ?
O3 Ca1 O2 Ca2 83.8(19) 11_475 . . 9_465 ?
O3 Ca1 O2 Ca2 64(2) 9_455 . . 9_465 ?
O3 Ca1 O2 Ca2 -39(2) 2_576 . . 9_465 ?
O3 Ca1 O2 Ca2 -153.9(18) 1_554 . . 9_465 ?
Al1 Ca1 O2 Ca2 -49.08(7) 32_354 . . 9_465 ?
Al1 Ca1 O2 Ca2 -171.08(7) 5_455 . . 9_465 ?
O1 Ca1 O2 Ca2 -89.05(6) . . . . ?
O1 Ca1 O2 Ca2 85.24(6) 2_575 . . . ?
O2 Ca1 O2 Ca2 0.0 2_575 . . . ?
O1 Ca1 O2 Ca2 153.73(7) 44_456 . . . ?
O1 Ca1 O2 Ca2 -158.54(5) 17_564 . . . ?
O3 Ca1 O2 Ca2 9.5(19) 11_475 . . . ?
O3 Ca1 O2 Ca2 -11(2) 9_455 . . . ?
O3 Ca1 O2 Ca2 -113(2) 2_576 . . . ?
O3 Ca1 O2 Ca2 131.9(18) 1_554 . . . ?
Al1 Ca1 O2 Ca2 -123.31(2) 32_354 . . . ?
Al1 Ca1 O2 Ca2 114.69(5) 5_455 . . . ?
O1 Ca1 O2 Ca1 84.68(8) . . . 17_564 ?
O1 Ca1 O2 Ca1 -101.03(11) 2_575 . . 17_564 ?
O2 Ca1 O2 Ca1 173.73(8) 2_575 . . 17_564 ?
O1 Ca1 O2 Ca1 -32.54(14) 44_456 . . 17_564 ?
O1 Ca1 O2 Ca1 15.19(6) 17_564 . . 17_564 ?
O3 Ca1 O2 Ca1 -176.7(19) 11_475 . . 17_564 ?
O3 Ca1 O2 Ca1 163(2) 9_455 . . 17_564 ?
O3 Ca1 O2 Ca1 60(2) 2_576 . . 17_564 ?
O3 Ca1 O2 Ca1 -54.4(18) 1_554 . . 17_564 ?
Al1 Ca1 O2 Ca1 50.42(6) 32_354 . . 17_564 ?
Al1 Ca1 O2 Ca1 -71.58(12) 5_455 . . 17_564 ?
O1 Ca1 O2 Ca1 -16.17(7) . . . 9_465 ?
O1 Ca1 O2 Ca1 158.12(8) 2_575 . . 9_465 ?
O2 Ca1 O2 Ca1 72.88(5) 2_575 . . 9_465 ?
O1 Ca1 O2 Ca1 -133.39(6) 44_456 . . 9_465 ?
O1 Ca1 O2 Ca1 -85.66(8) 17_564 . . 9_465 ?
O3 Ca1 O2 Ca1 82.4(19) 11_475 . . 9_465 ?
O3 Ca1 O2 Ca1 62(2) 9_455 . . 9_465 ?
O3 Ca1 O2 Ca1 -40(2) 2_576 . . 9_465 ?
O3 Ca1 O2 Ca1 -155.2(18) 1_554 . . 9_465 ?
Al1 Ca1 O2 Ca1 -50.42(6) 32_354 . . 9_465 ?
Al1 Ca1 O2 Ca1 -172.43(5) 5_455 . . 9_465 ?
O1 Al2 O1 Al1 -23.20(15) 31 . . 32_354 ?
O1 Al2 O1 Al1 -140.3(2) 29_355 . . 32_354 ?
O1 Al2 O1 Al1 98.24(18) 3_575 . . 32_354 ?
Ca1 Al2 O1 Al1 -81.76(18) 37_465 . . 32_354 ?
Ca1 Al2 O1 Al1 98.24(18) 9_465 . . 32_354 ?
Ca2 Al2 O1 Al1 -40.47(19) 31 . . 32_354 ?
Ca2 Al2 O1 Al1 -167.4(3) . . . 32_354 ?
Ca2 Al2 O1 Al1 -175.59(11) 29_355 . . 32_354 ?
Ca2 Al2 O1 Al1 57.6(2) 3_575 . . 32_354 ?
Ca1 Al2 O1 Al1 -33.74(17) 31 . . 32_354 ?
Ca1 Al2 O1 Al1 -159.4(3) . . . 32_354 ?
O1 Al2 O1 Ca1 136.21(16) 31 . . . ?
O1 Al2 O1 Ca1 19.08(9) 29_355 . . . ?
O1 Al2 O1 Ca1 -102.36(12) 3_575 . . . ?
Ca1 Al2 O1 Ca1 77.64(12) 37_465 . . . ?
Ca1 Al2 O1 Ca1 -102.36(12) 9_465 . . . ?
Ca2 Al2 O1 Ca1 118.94(14) 31 . . . ?
Ca2 Al2 O1 Ca1 -7.98(9) . . . . ?
Ca2 Al2 O1 Ca1 -16.19(19) 29_355 . . . ?
Ca2 Al2 O1 Ca1 -143.04(12) 3_575 . . . ?
Ca1 Al2 O1 Ca1 125.66(11) 31 . . . ?
O1 Al2 O1 Ca2 144.19(17) 31 . . . ?
O1 Al2 O1 Ca2 27.06(12) 29_355 . . . ?
O1 Al2 O1 Ca2 -94.38(14) 3_575 . . . ?
Ca1 Al2 O1 Ca2 85.62(14) 37_465 . . . ?
Ca1 Al2 O1 Ca2 -94.38(14) 9_465 . . . ?
Ca2 Al2 O1 Ca2 126.92(10) 31 . . . ?
Ca2 Al2 O1 Ca2 -8.21(17) 29_355 . . . ?
Ca2 Al2 O1 Ca2 -135.06(7) 3_575 . . . ?
Ca1 Al2 O1 Ca2 133.64(13) 31 . . . ?
Ca1 Al2 O1 Ca2 7.98(9) . . . . ?
O1 Al2 O1 Ca1 -121.44(4) 31 . . 9_465 ?
O1 Al2 O1 Ca1 121.44(4) 29_355 . . 9_465 ?
O1 Al2 O1 Ca1 0.0 3_575 . . 9_465 ?
Ca1 Al2 O1 Ca1 180.0 37_465 . . 9_465 ?
Ca2 Al2 O1 Ca1 -138.71(12) 31 . . 9_465 ?
Ca2 Al2 O1 Ca1 94.38(14) . . . 9_465 ?
Ca2 Al2 O1 Ca1 86.17(12) 29_355 . . 9_465 ?
Ca2 Al2 O1 Ca1 -40.69(10) 3_575 . . 9_465 ?
Ca1 Al2 O1 Ca1 -131.98(5) 31 . . 9_465 ?
Ca1 Al2 O1 Ca1 102.36(12) . . . 9_465 ?
O1 Al2 O1 Ca2 -121.44(4) 31 . . 9_465 ?
O1 Al2 O1 Ca2 121.44(4) 29_355 . . 9_465 ?
O1 Al2 O1 Ca2 0.0 3_575 . . 9_465 ?
Ca1 Al2 O1 Ca2 180.0 37_465 . . 9_465 ?
Ca1 Al2 O1 Ca2 0.0 9_465 . . 9_465 ?
Ca2 Al2 O1 Ca2 -138.71(12) 31 . . 9_465 ?
Ca2 Al2 O1 Ca2 94.38(14) . . . 9_465 ?
Ca2 Al2 O1 Ca2 86.17(12) 29_355 . . 9_465 ?
Ca2 Al2 O1 Ca2 -40.69(10) 3_575 . . 9_465 ?
Ca1 Al2 O1 Ca2 -131.98(5) 31 . . 9_465 ?
Ca1 Al2 O1 Ca2 102.36(12) . . . 9_465 ?
O1 Ca1 O1 Al2 38.68(11) 2_575 . . . ?
O2 Ca1 O1 Al2 -37.82(14) 2_575 . . . ?
O2 Ca1 O1 Al2 115.99(12) . . . . ?
O1 Ca1 O1 Al2 -117.79(11) 44_456 . . . ?
O1 Ca1 O1 Al2 -163.82(14) 17_564 . . . ?
O3 Ca1 O1 Al2 26.3(18) 11_475 . . . ?
O3 Ca1 O1 Al2 51.3(18) 9_455 . . . ?
O3 Ca1 O1 Al2 -82.9(19) 2_576 . . . ?
O3 Ca1 O1 Al2 157.2(19) 1_554 . . . ?
Al1 Ca1 O1 Al2 -166.03(19) 32_354 . . . ?
Al1 Ca1 O1 Al2 -112.30(14) 5_455 . . . ?
O1 Ca1 O1 Al1 -155.29(8) 2_575 . . 32_354 ?
O2 Ca1 O1 Al1 128.21(9) 2_575 . . 32_354 ?
O2 Ca1 O1 Al1 -77.97(9) . . . 32_354 ?
O1 Ca1 O1 Al1 48.24(10) 44_456 . . 32_354 ?
O1 Ca1 O1 Al1 2.21(7) 17_564 . . 32_354 ?
O3 Ca1 O1 Al1 -167.7(18) 11_475 . . 32_354 ?
O3 Ca1 O1 Al1 -142.7(18) 9_455 . . 32_354 ?
O3 Ca1 O1 Al1 83.1(19) 2_576 . . 32_354 ?
O3 Ca1 O1 Al1 -36.8(19) 1_554 . . 32_354 ?
Al1 Ca1 O1 Al1 53.73(15) 5_455 . . 32_354 ?
O1 Ca1 O1 Ca2 0.0 2_575 . . . ?
O2 Ca1 O1 Ca2 -76.50(5) 2_575 . . . ?
O2 Ca1 O1 Ca2 77.32(5) . . . . ?
O1 Ca1 O1 Ca2 -156.47(5) 44_456 . . . ?
O1 Ca1 O1 Ca2 157.50(5) 17_564 . . . ?
O3 Ca1 O1 Ca2 -12.4(18) 11_475 . . . ?
O3 Ca1 O1 Ca2 12.6(18) 9_455 . . . ?
O3 Ca1 O1 Ca2 -121.6(19) 2_576 . . . ?
O3 Ca1 O1 Ca2 118.5(19) 1_554 . . . ?
Al1 Ca1 O1 Ca2 155.29(8) 32_354 . . . ?
Al1 Ca1 O1 Ca2 -150.98(10) 5_455 . . . ?
O1 Ca1 O1 Ca1 -61.92(5) 2_575 . . 9_465 ?
O2 Ca1 O1 Ca1 -138.42(8) 2_575 . . 9_465 ?
O2 Ca1 O1 Ca1 15.40(5) . . . 9_465 ?
O1 Ca1 O1 Ca1 141.61(7) 44_456 . . 9_465 ?
O1 Ca1 O1 Ca1 95.58(6) 17_564 . . 9_465 ?
O3 Ca1 O1 Ca1 -74.3(18) 11_475 . . 9_465 ?
O3 Ca1 O1 Ca1 -49.3(18) 9_455 . . 9_465 ?
O3 Ca1 O1 Ca1 176.5(19) 2_576 . . 9_465 ?
O3 Ca1 O1 Ca1 56.6(19) 1_554 . . 9_465 ?
Al1 Ca1 O1 Ca1 93.37(8) 32_354 . . 9_465 ?
Al1 Ca1 O1 Ca1 147.10(10) 5_455 . . 9_465 ?
O1 Ca1 O1 Ca2 -66.24(7) 2_575 . . 9_465 ?
O2 Ca1 O1 Ca2 -142.74(10) 2_575 . . 9_465 ?
O2 Ca1 O1 Ca2 11.08(6) . . . 9_465 ?
O1 Ca1 O1 Ca2 137.29(9) 44_456 . . 9_465 ?
O1 Ca1 O1 Ca2 91.26(7) 17_564 . . 9_465 ?
O3 Ca1 O1 Ca2 -78.6(18) 11_475 . . 9_465 ?
O3 Ca1 O1 Ca2 -53.6(18) 9_455 . . 9_465 ?
O3 Ca1 O1 Ca2 172.2(19) 2_576 . . 9_465 ?
O3 Ca1 O1 Ca2 52.2(19) 1_554 . . 9_465 ?
Al1 Ca1 O1 Ca2 89.05(9) 32_354 . . 9_465 ?
Al1 Ca1 O1 Ca2 142.78(13) 5_455 . . 9_465 ?
Al1 O2 Ca2 O3 -40(2) . . . 11_475 ?
Ca2 O2 Ca2 O3 -163(2) 17_564 . . 11_475 ?
Ca2 O2 Ca2 O3 83(2) 9_465 . . 11_475 ?
Ca1 O2 Ca2 O3 -174(2) 17_564 . . 11_475 ?
Ca1 O2 Ca2 O3 84(2) 9_465 . . 11_475 ?
Ca1 O2 Ca2 O3 -168(2) . . . 11_475 ?
Al1 O2 Ca2 O3 -65(2) . . . 9_455 ?
Ca2 O2 Ca2 O3 173(2) 17_564 . . 9_455 ?
Ca2 O2 Ca2 O3 58(2) 9_465 . . 9_455 ?
Ca1 O2 Ca2 O3 161(2) 17_564 . . 9_455 ?
Ca1 O2 Ca2 O3 59(2) 9_465 . . 9_455 ?
Ca1 O2 Ca2 O3 168(2) . . . 9_455 ?
Al1 O2 Ca2 O2 -52.24(6) . . . 2_575 ?
Ca2 O2 Ca2 O2 -174.92(19) 17_564 . . 2_575 ?
Ca2 O2 Ca2 O2 70.43(10) 9_465 . . 2_575 ?
Ca1 O2 Ca2 O2 173.38(8) 17_564 . . 2_575 ?
Ca1 O2 Ca2 O2 71.46(6) 9_465 . . 2_575 ?
Ca1 O2 Ca2 O2 180.001(2) . . . 2_575 ?
Al1 O2 Ca2 O1 -151.44(10) . . . . ?
Ca2 O2 Ca2 O1 85.89(10) 17_564 . . . ?
Ca2 O2 Ca2 O1 -28.8(2) 9_465 . . . ?
Ca1 O2 Ca2 O1 74.19(16) 17_564 . . . ?
Ca1 O2 Ca2 O1 -27.74(18) 9_465 . . . ?
Ca1 O2 Ca2 O1 80.81(16) . . . . ?
Al1 O2 Ca2 O1 46.6(3) . . . 2_575 ?
Ca2 O2 Ca2 O1 -76.1(4) 17_564 . . 2_575 ?
Ca2 O2 Ca2 O1 169.23(16) 9_465 . . 2_575 ?
Ca1 O2 Ca2 O1 -87.8(2) 17_564 . . 2_575 ?
Ca1 O2 Ca2 O1 170.3(2) 9_465 . . 2_575 ?
Ca1 O2 Ca2 O1 -81.2(2) . . . 2_575 ?
Al1 O2 Ca2 O3 -39.6(16) . . . 7_556 ?
Ca2 O2 Ca2 O3 -162.3(16) 17_564 . . 7_556 ?
Ca2 O2 Ca2 O3 83.0(15) 9_465 . . 7_556 ?
Ca1 O2 Ca2 O3 -174.0(16) 17_564 . . 7_556 ?
Ca1 O2 Ca2 O3 84.1(15) 9_465 . . 7_556 ?
Ca1 O2 Ca2 O3 -167.4(16) . . . 7_556 ?
Al1 O2 Ca2 O3 -64.8(15) . . . 30_553 ?
Ca2 O2 Ca2 O3 172.6(15) 17_564 . . 30_553 ?
Ca2 O2 Ca2 O3 57.9(16) 9_465 . . 30_553 ?
Ca1 O2 Ca2 O3 160.9(15) 17_564 . . 30_553 ?
Ca1 O2 Ca2 O3 58.9(16) 9_465 . . 30_553 ?
Ca1 O2 Ca2 O3 167.5(15) . . . 30_553 ?
Al1 O2 Ca2 O1 108.45(14) . . . 44_456 ?
Ca2 O2 Ca2 O1 -14.2(3) 17_564 . . 44_456 ?
Ca2 O2 Ca2 O1 -128.87(6) 9_465 . . 44_456 ?
Ca1 O2 Ca2 O1 -25.92(15) 17_564 . . 44_456 ?
Ca1 O2 Ca2 O1 -127.84(7) 9_465 . . 44_456 ?
Ca1 O2 Ca2 O1 -19.30(9) . . . 44_456 ?
Al1 O2 Ca2 O1 146.72(5) . . . 17_564 ?
Ca2 O2 Ca2 O1 24.04(16) 17_564 . . 17_564 ?
Ca2 O2 Ca2 O1 -90.61(14) 9_465 . . 17_564 ?
Ca1 O2 Ca2 O1 12.34(7) 17_564 . . 17_564 ?
Ca1 O2 Ca2 O1 -89.58(10) 9_465 . . 17_564 ?
Ca1 O2 Ca2 O1 18.96(5) . . . 17_564 ?
Al1 O2 Ca2 Al1 180.0 . . . 32_354 ?
Ca2 O2 Ca2 Al1 57.32(14) 17_564 . . 32_354 ?
Ca2 O2 Ca2 Al1 -57.32(14) 9_465 . . 32_354 ?
Ca1 O2 Ca2 Al1 45.63(8) 17_564 . . 32_354 ?
Ca1 O2 Ca2 Al1 -56.30(10) 9_465 . . 32_354 ?
Ca1 O2 Ca2 Al1 52.25(6) . . . 32_354 ?
Al1 O2 Ca2 Al1 74.8(2) . . . 5_455 ?
Ca2 O2 Ca2 Al1 -47.9(3) 17_564 . . 5_455 ?
Ca2 O2 Ca2 Al1 -162.57(10) 9_465 . . 5_455 ?
Ca1 O2 Ca2 Al1 -59.6(2) 17_564 . . 5_455 ?
Ca1 O2 Ca2 Al1 -161.54(14) 9_465 . . 5_455 ?
Ca1 O2 Ca2 Al1 -53.00(16) . . . 5_455 ?
Al2 O1 Ca2 O3 19(2) . . . 11_475 ?
Al1 O1 Ca2 O3 -170(2) 32_354 . . 11_475 ?
Ca1 O1 Ca2 O3 164(2) . . . 11_475 ?
Ca1 O1 Ca2 O3 -77(2) 9_465 . . 11_475 ?
Ca2 O1 Ca2 O3 -82(2) 9_465 . . 11_475 ?
Al2 O1 Ca2 O3 50(2) . . . 9_455 ?
Al1 O1 Ca2 O3 -139(2) 32_354 . . 9_455 ?
Ca1 O1 Ca2 O3 -165(2) . . . 9_455 ?
Ca1 O1 Ca2 O3 -46(2) 9_465 . . 9_455 ?
Ca2 O1 Ca2 O3 -51(2) 9_465 . . 9_455 ?
Al2 O1 Ca2 O2 -55.0(3) . . . 2_575 ?
Al1 O1 Ca2 O2 116.0(2) 32_354 . . 2_575 ?
Ca1 O1 Ca2 O2 90.0(2) . . . 2_575 ?
Ca1 O1 Ca2 O2 -151.0(2) 9_465 . . 2_575 ?
Ca2 O1 Ca2 O2 -155.7(3) 9_465 . . 2_575 ?
Al2 O1 Ca2 O2 122.29(15) . . . . ?
Al1 O1 Ca2 O2 -66.74(19) 32_354 . . . ?
Ca1 O1 Ca2 O2 -92.67(15) . . . . ?
Ca1 O1 Ca2 O2 26.33(15) 9_465 . . . ?
Ca2 O1 Ca2 O2 21.58(10) 9_465 . . . ?
Al2 O1 Ca2 O1 -145.05(11) . . . 2_575 ?
Al1 O1 Ca2 O1 25.93(8) 32_354 . . 2_575 ?
Ca1 O1 Ca2 O1 0.0 . . . 2_575 ?
Ca1 O1 Ca2 O1 119.00(5) 9_465 . . 2_575 ?
Ca2 O1 Ca2 O1 114.25(7) 9_465 . . 2_575 ?
Al2 O1 Ca2 O3 45.9(19) . . . 7_556 ?
Al1 O1 Ca2 O3 -143.1(19) 32_354 . . 7_556 ?
Ca1 O1 Ca2 O3 -169.0(19) . . . 7_556 ?
Ca1 O1 Ca2 O3 -50.0(19) 9_465 . . 7_556 ?
Ca2 O1 Ca2 O3 -54.8(19) 9_465 . . 7_556 ?
Al2 O1 Ca2 O3 24.6(18) . . . 30_553 ?
Al1 O1 Ca2 O3 -164.4(18) 32_354 . . 30_553 ?
Ca1 O1 Ca2 O3 169.7(18) . . . 30_553 ?
Ca1 O1 Ca2 O3 -71.3(18) 9_465 . . 30_553 ?
Ca2 O1 Ca2 O3 -76.1(18) 9_465 . . 30_553 ?
Al2 O1 Ca2 O1 -126.87(13) . . . 44_456 ?
Al1 O1 Ca2 O1 44.11(11) 32_354 . . 44_456 ?
Ca1 O1 Ca2 O1 18.17(7) . . . 44_456 ?
Ca1 O1 Ca2 O1 137.18(9) 9_465 . . 44_456 ?
Ca2 O1 Ca2 O1 132.42(13) 9_465 . . 44_456 ?
Al2 O1 Ca2 O1 -165.47(14) . . . 17_564 ?
Al1 O1 Ca2 O1 5.51(8) 32_354 . . 17_564 ?
Ca1 O1 Ca2 O1 -20.42(5) . . . 17_564 ?
Ca1 O1 Ca2 O1 98.58(5) 9_465 . . 17_564 ?
Ca2 O1 Ca2 O1 93.82(6) 9_465 . . 17_564 ?
Al2 O1 Ca2 Al1 -170.98(19) . . . 32_354 ?
Ca1 O1 Ca2 Al1 -25.93(8) . . . 32_354 ?
Ca1 O1 Ca2 Al1 93.07(10) 9_465 . . 32_354 ?
Ca2 O1 Ca2 Al1 88.31(12) 9_465 . . 32_354 ?
Al2 O1 Ca2 Al1 -127.64(16) . . . 5_455 ?
Al1 O1 Ca2 Al1 43.34(15) 32_354 . . 5_455 ?
Ca1 O1 Ca2 Al1 17.41(11) . . . 5_455 ?
Ca1 O1 Ca2 Al1 136.41(12) 9_465 . . 5_455 ?
Ca2 O1 Ca2 Al1 131.66(17) 9_465 . . 5_455 ?
 
_diffrn_measured_fraction_theta_max    1.000
_diffrn_reflns_theta_full              34.89
_diffrn_measured_fraction_theta_full   1.000
_refine_diff_density_max    2.138
_refine_diff_density_min   -1.038
_refine_diff_density_rms    0.179
